# Supplementary material for: Unsaturated fatty acids and a prenylated tryptophan derivative from a rare actinomycete of the genus Couchioplanes
Source: publisher site journal article supplement (doi:10.3762/bjoc.17.203), 2021-12-16

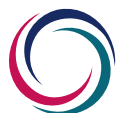

## Supporting Information

for

### Unsaturated fatty acids and a prenylated tryptophan derivative from a rare actinomycete of the genus *Couchioplanes*

Shun Saito, Kanji Indo, Naoya Oku, Hisayuki Komaki, Masashi Kawasaki  
and Yasuhiro Igarashi

*Beilstein J. Org. Chem.* **2021**, *17*, 2939–2949. doi:10.3762/bjoc.17.203

## Copies of NMR spectra

## Table of contents

|                                                                                                        |     |
|--------------------------------------------------------------------------------------------------------|-----|
| <b>Figure S1.</b> $^1\text{H}$ NMR spectrum of compound <b>1</b> (500 MHz, $\text{CDCl}_3$ )           | S4  |
| <b>Figure S2.</b> $^{13}\text{C}$ NMR spectrum of <b>1</b> (125 MHz, $\text{CDCl}_3$ )                 | S5  |
| <b>Figure S3.</b> $^1\text{H}$ - $^1\text{H}$ COSY spectrum of <b>1</b> (500 MHz, $\text{CDCl}_3$ )    | S6  |
| <b>Figure S4.</b> HSQC spectrum of <b>1</b> (500 MHz, $\text{CDCl}_3$ )                                | S7  |
| <b>Figure S5.</b> HMBC spectrum of <b>1</b> (500 MHz, $\text{CDCl}_3$ )                                | S8  |
| <b>Figure S6.</b> NOESY spectrum of <b>1</b> (500 MHz, $\text{CDCl}_3$ )                               | S9  |
| <b>Figure S7.</b> $^1\text{H}$ NMR spectrum of compound <b>2</b> (500 MHz, $\text{CDCl}_3$ )           | S10 |
| <b>Figure S8.</b> $^{13}\text{C}$ NMR spectrum of <b>2</b> (125 MHz, $\text{CDCl}_3$ )                 | S11 |
| <b>Figure S9.</b> $^1\text{H}$ - $^1\text{H}$ COSY spectrum of <b>2</b> (500 MHz, $\text{CDCl}_3$ )    | S12 |
| <b>Figure S10.</b> HSQC spectrum of <b>2</b> (500 MHz, $\text{CDCl}_3$ )                               | S13 |
| <b>Figure S11.</b> HMBC spectrum of <b>2</b> (500 MHz, $\text{CDCl}_3$ )                               | S14 |
| <b>Figure S12.</b> NOESY spectrum of <b>2</b> (500 MHz, $\text{CDCl}_3$ )                              | S15 |
| <b>Figure S13.</b> $^1\text{H}$ NMR spectrum of compound <b>3</b> (500 MHz, $\text{CDCl}_3$ )          | S16 |
| <b>Figure S14.</b> $^{13}\text{C}$ NMR spectrum of <b>3</b> (125 MHz, $\text{CDCl}_3$ )                | S17 |
| <b>Figure S15.</b> $^1\text{H}$ - $^1\text{H}$ COSY spectrum of <b>3</b> (500 MHz, $\text{CDCl}_3$ )   | S18 |
| <b>Figure S16.</b> HSQC spectrum of <b>3</b> (500 MHz, $\text{CDCl}_3$ )                               | S19 |
| <b>Figure S17.</b> HMBC spectrum of <b>3</b> (500 MHz, $\text{CDCl}_3$ )                               | S20 |
| <b>Figure S18.</b> NOESY spectrum of <b>3</b> (500 MHz, $\text{CDCl}_3$ )                              | S21 |
| <b>Figure S19.</b> $^1\text{H}$ NMR spectrum of compound <b>4</b> (500 MHz, $\text{CDCl}_3$ )          | S22 |
| <b>Figure S20.</b> $^{13}\text{C}$ NMR spectrum of <b>4</b> (125 MHz, $\text{CDCl}_3$ )                | S23 |
| <b>Figure S21.</b> $^1\text{H}$ - $^1\text{H}$ COSY spectrum of <b>4</b> (500 MHz, $\text{CDCl}_3$ )   | S24 |
| <b>Figure S22.</b> HSQC spectrum of <b>4</b> (500 MHz, $\text{CDCl}_3$ )                               | S25 |
| <b>Figure S23.</b> HMBC spectrum of <b>4</b> (500 MHz, $\text{CDCl}_3$ )                               | S26 |
| <b>Figure S24.</b> NOESY spectrum of <b>4</b> (500 MHz, $\text{CDCl}_3$ )                              | S27 |
| <b>Figure S25.</b> $^1\text{H}$ - $^1\text{H}$ COSY spectrum of <b>4'a</b> (500 MHz, $\text{CDCl}_3$ ) | S28 |
| <b>Figure S26.</b> $^1\text{H}$ - $^1\text{H}$ COSY spectrum of <b>4'b</b> (500 MHz, $\text{CDCl}_3$ ) | S29 |
| <b>Figure S27.</b> $^1\text{H}$ NMR spectrum of compound <b>5</b> (500 MHz, $\text{CDCl}_3$ )          | S30 |
| <b>Figure S28.</b> $^{13}\text{C}$ NMR spectrum of <b>5</b> (125 MHz, $\text{CDCl}_3$ )                | S31 |
| <b>Figure S29.</b> $^1\text{H}$ - $^1\text{H}$ COSY spectrum of <b>5</b> (500 MHz, $\text{CDCl}_3$ )   | S32 |
| <b>Figure S30.</b> HSQC spectrum of <b>5</b> (500 MHz, $\text{CDCl}_3$ )                               | S33 |
| <b>Figure S31.</b> HMBC spectrum of <b>5</b> (500 MHz, $\text{CDCl}_3$ )                               | S34 |
| <b>Figure S32.</b> NOESY spectrum of <b>5</b> (500 MHz, $\text{CDCl}_3$ )                              | S35 |
| <b>Figure S33.</b> $^1\text{H}$ NMR spectrum of compound <b>6</b> (500 MHz, $\text{CDCl}_3$ )          | S36 |
| <b>Figure S34.</b> $^{13}\text{C}$ NMR spectrum of <b>6</b> (125 MHz, $\text{CDCl}_3$ )                | S37 |

|                                                                                                         |     |
|---------------------------------------------------------------------------------------------------------|-----|
| <b>Figure S35.</b> $^1\text{H}$ - $^1\text{H}$ COSY spectrum of <b>6</b> (500 MHz, $\text{CDCl}_3$ )    | S38 |
| <b>Figure S36.</b> HSQC spectrum of <b>6</b> (500 MHz, $\text{CDCl}_3$ )                                | S39 |
| <b>Figure S37.</b> HMBC spectrum of <b>6</b> (500 MHz, $\text{CDCl}_3$ )                                | S40 |
| <b>Figure S38.</b> $^1\text{H}$ NMR spectrum of <b>6a</b> (500 MHz, $\text{DMSO}-d_6$ )                 | S41 |
| <b>Figure S39.</b> $^1\text{H}$ - $^1\text{H}$ COSY spectrum of <b>6a</b> (500 MHz, $\text{DMSO}-d_6$ ) | S42 |
| <b>Figure S40.</b> HSQC spectrum of <b>6a</b> (500 MHz, $\text{DMSO}-d_6$ )                             | S43 |
| <b>Figure S41.</b> HMBC spectrum of <b>6a</b> (500 MHz, $\text{DMSO}-d_6$ )                             | S44 |
| <b>Figure S42.</b> $^1\text{H}$ NMR spectrum of <b>6b</b> (500 MHz, $\text{DMSO}-d_6$ )                 | S45 |
| <b>Figure S43.</b> $^1\text{H}$ - $^1\text{H}$ COSY spectrum of <b>6b</b> (500 MHz, $\text{DMSO}-d_6$ ) | S46 |
| <b>Figure S44.</b> HSQC spectrum of <b>6b</b> (500 MHz, $\text{DMSO}-d_6$ )                             | S47 |
| <b>Figure S45.</b> HMBC spectrum of <b>6b</b> (500 MHz, $\text{DMSO}-d_6$ )                             | S48 |

**Figure S1.**  $^1\text{H}$  NMR spectrum of compound **1** (500 MHz,  $\text{CDCl}_3$ ).

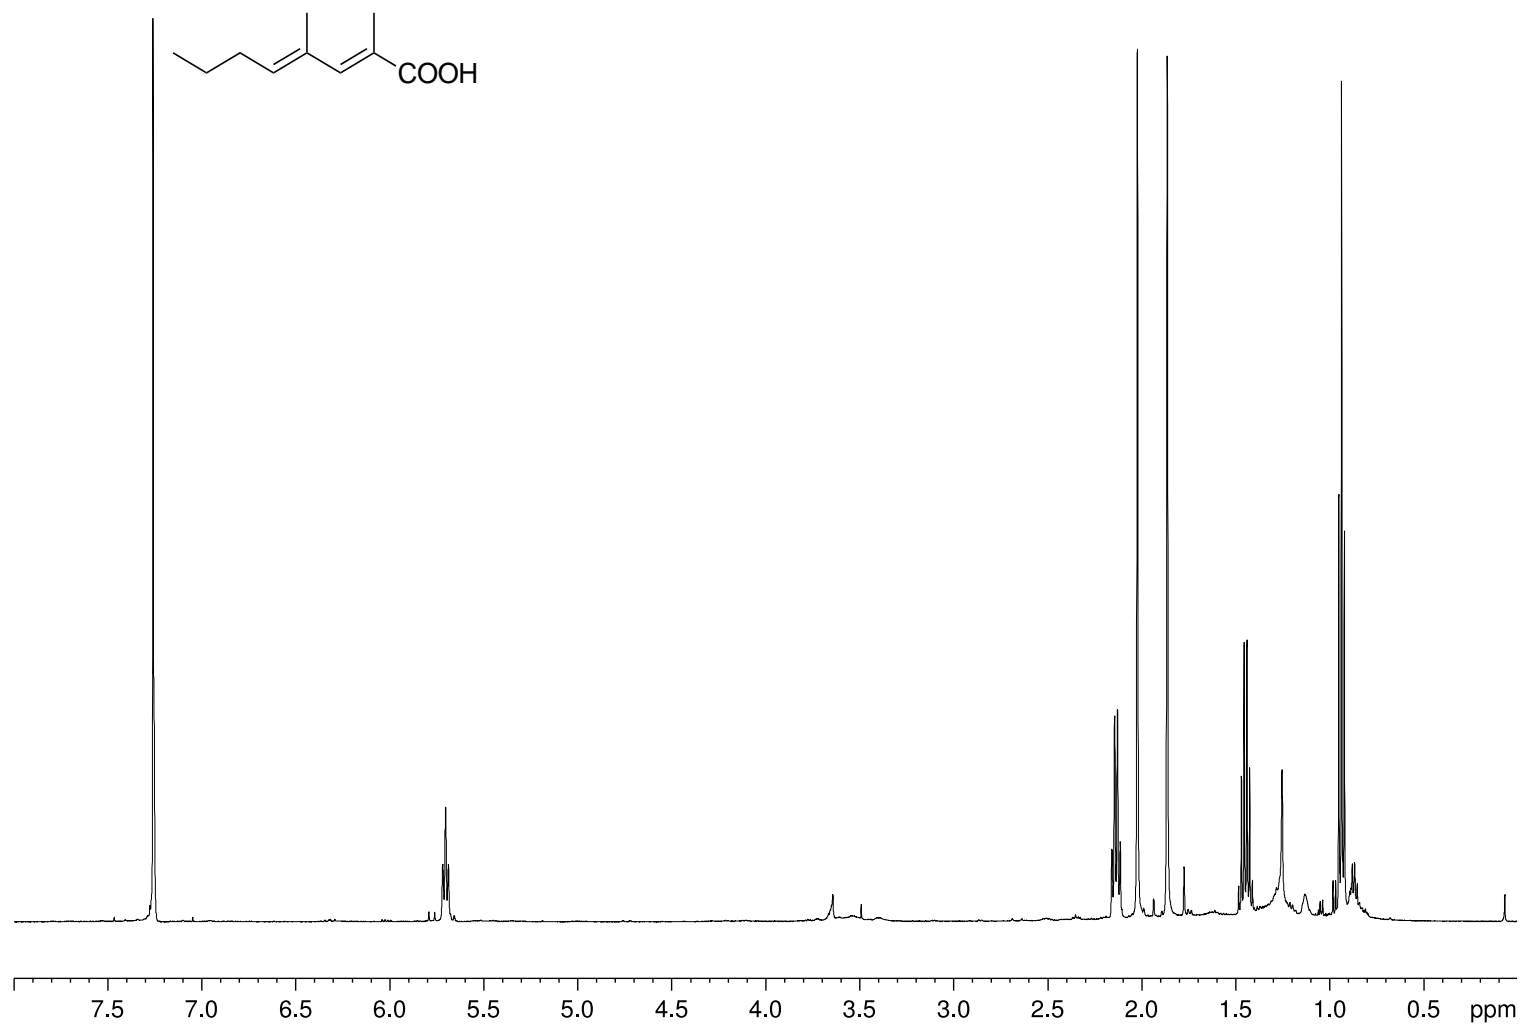

**Figure S2.**  $^{13}\text{C}$  NMR spectrum of **1** (500 MHz,  $\text{CDCl}_3$ ).

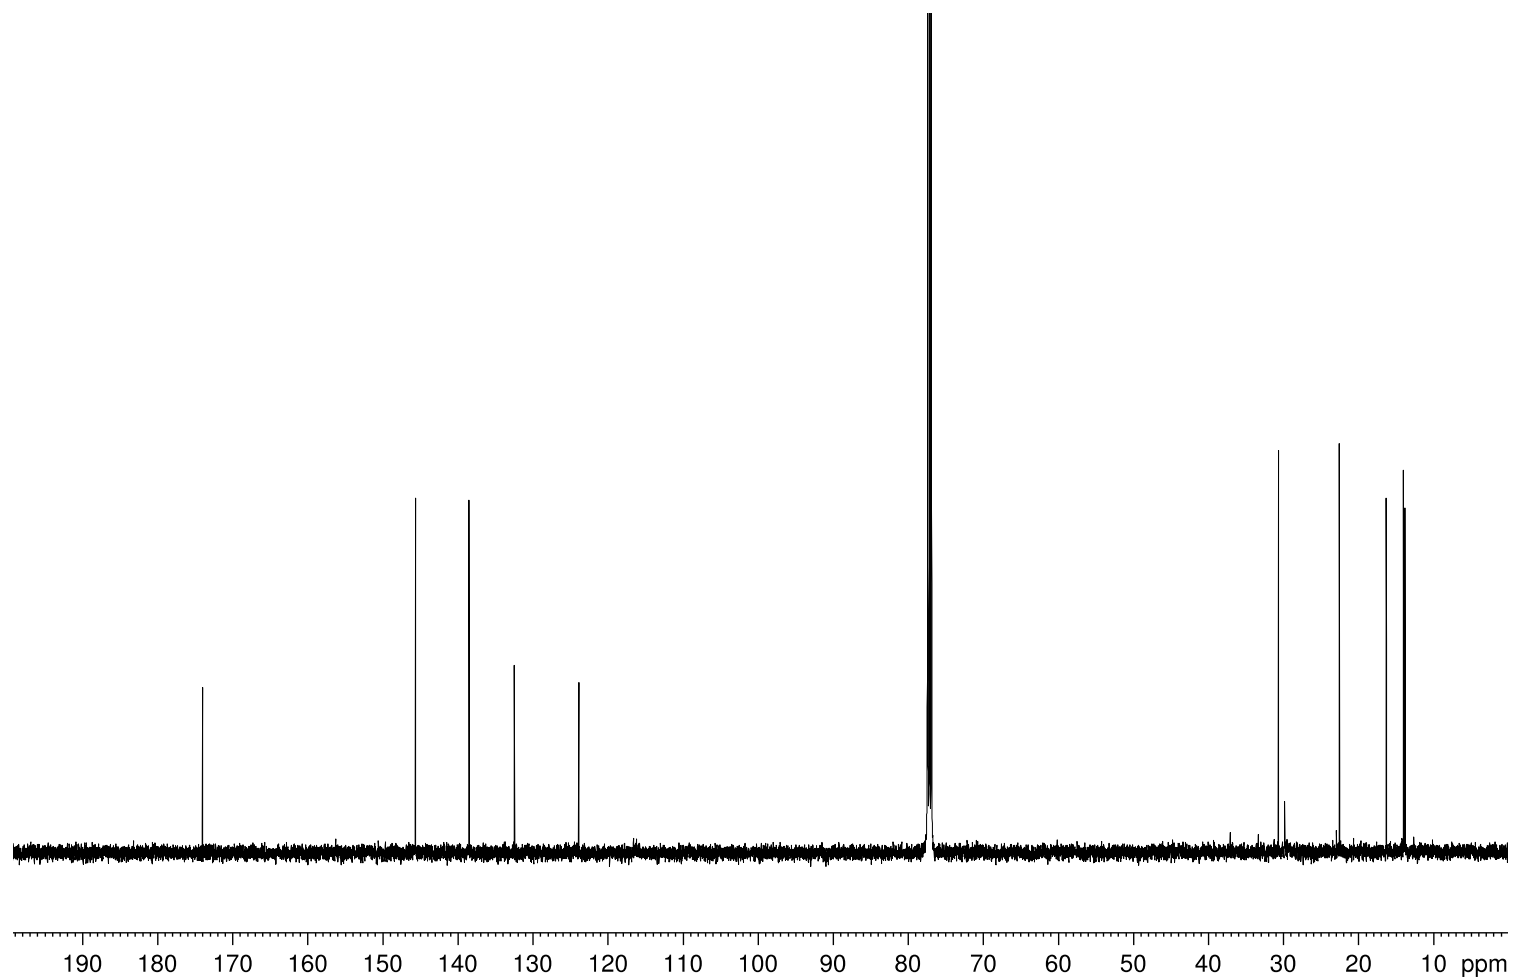

**Figure S3.**  $^1\text{H}$ - $^1\text{H}$  COSY spectrum of **1** (500 MHz,  $\text{CDCl}_3$ ).

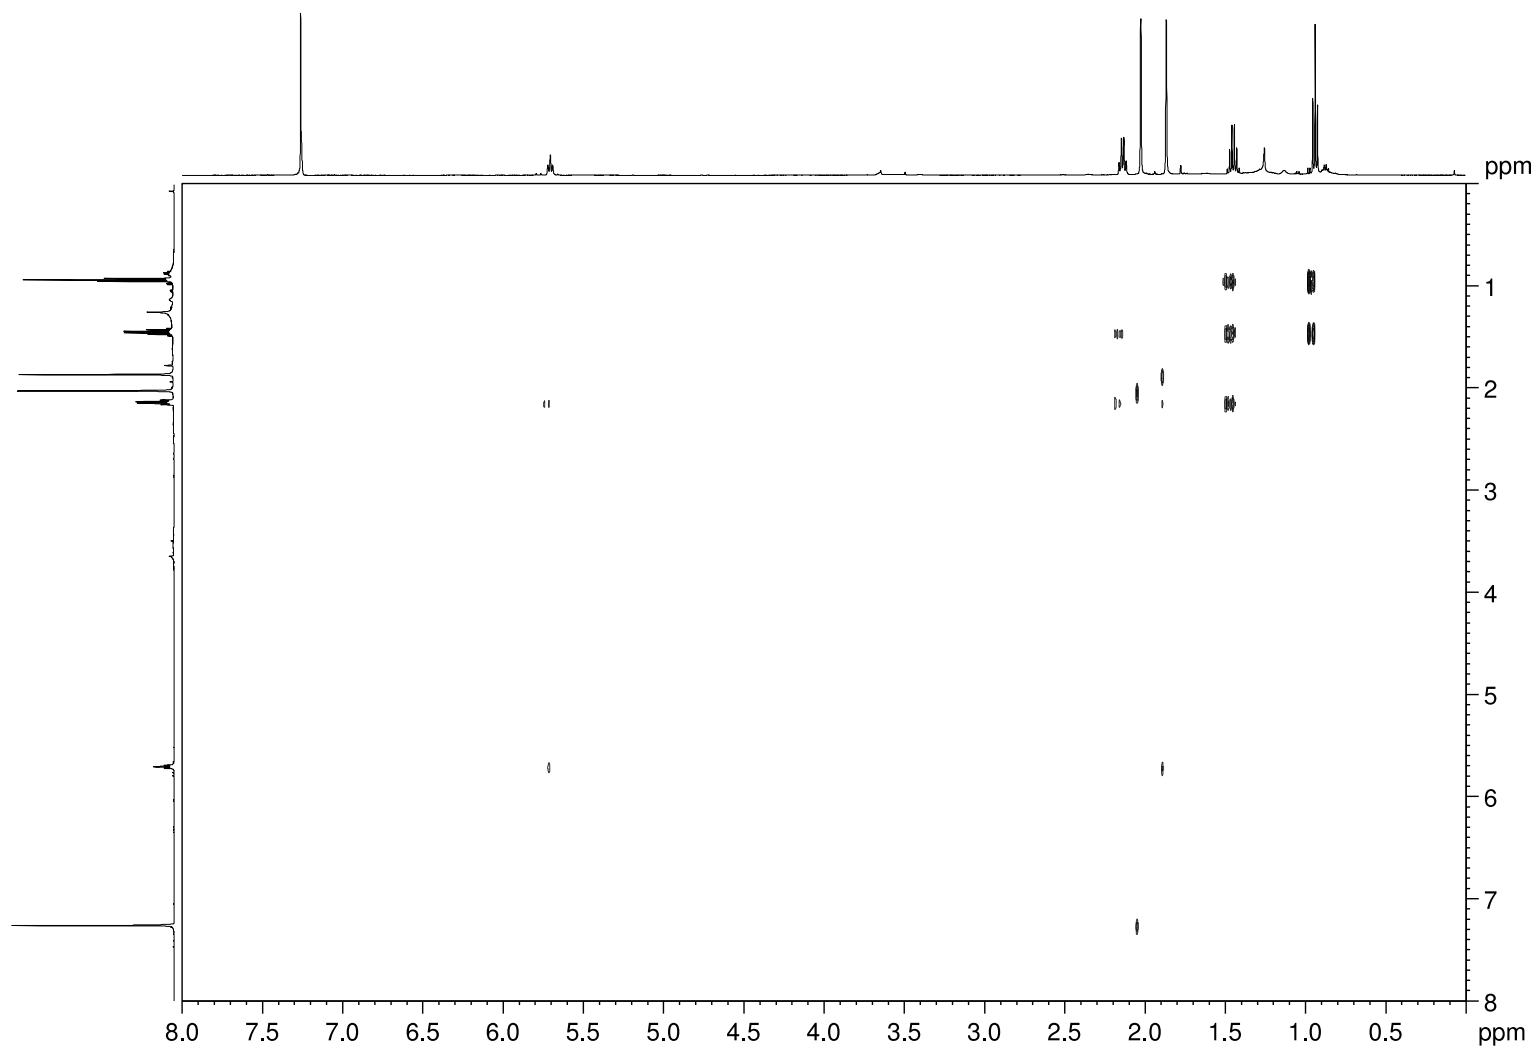

**Figure S4.** HSQC spectrum of **1** (500 MHz, CDCl<sub>3</sub>).

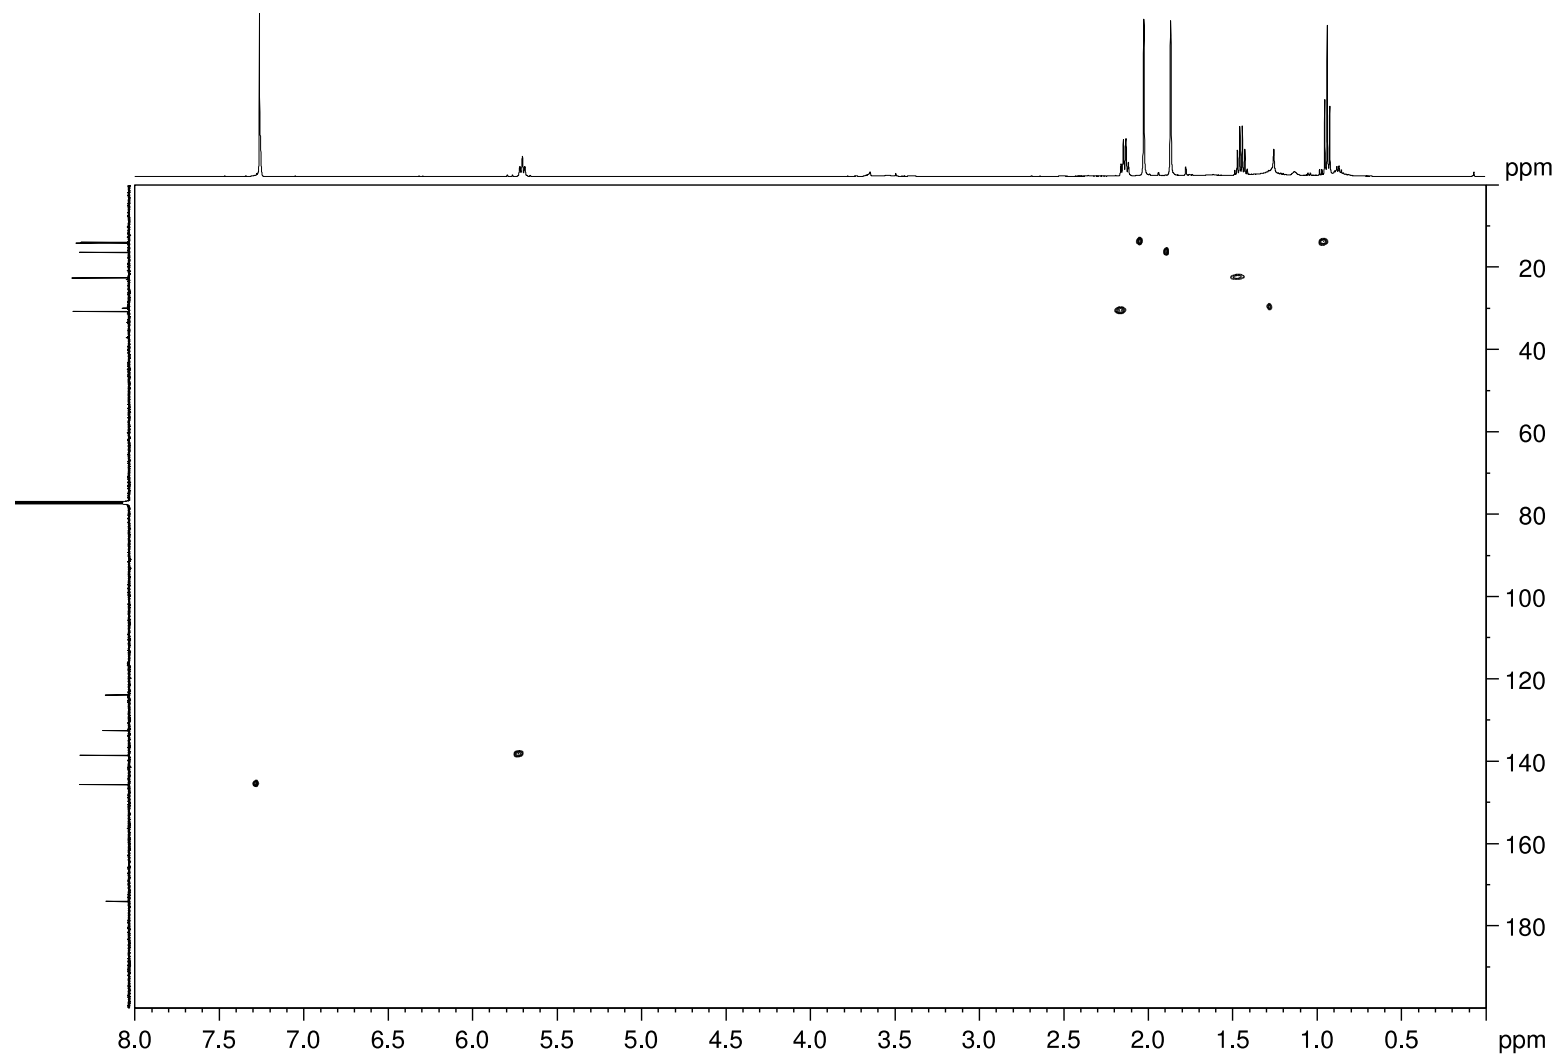

**Figure S5.** HMBC spectrum of **1** (500 MHz, CDCl<sub>3</sub>).

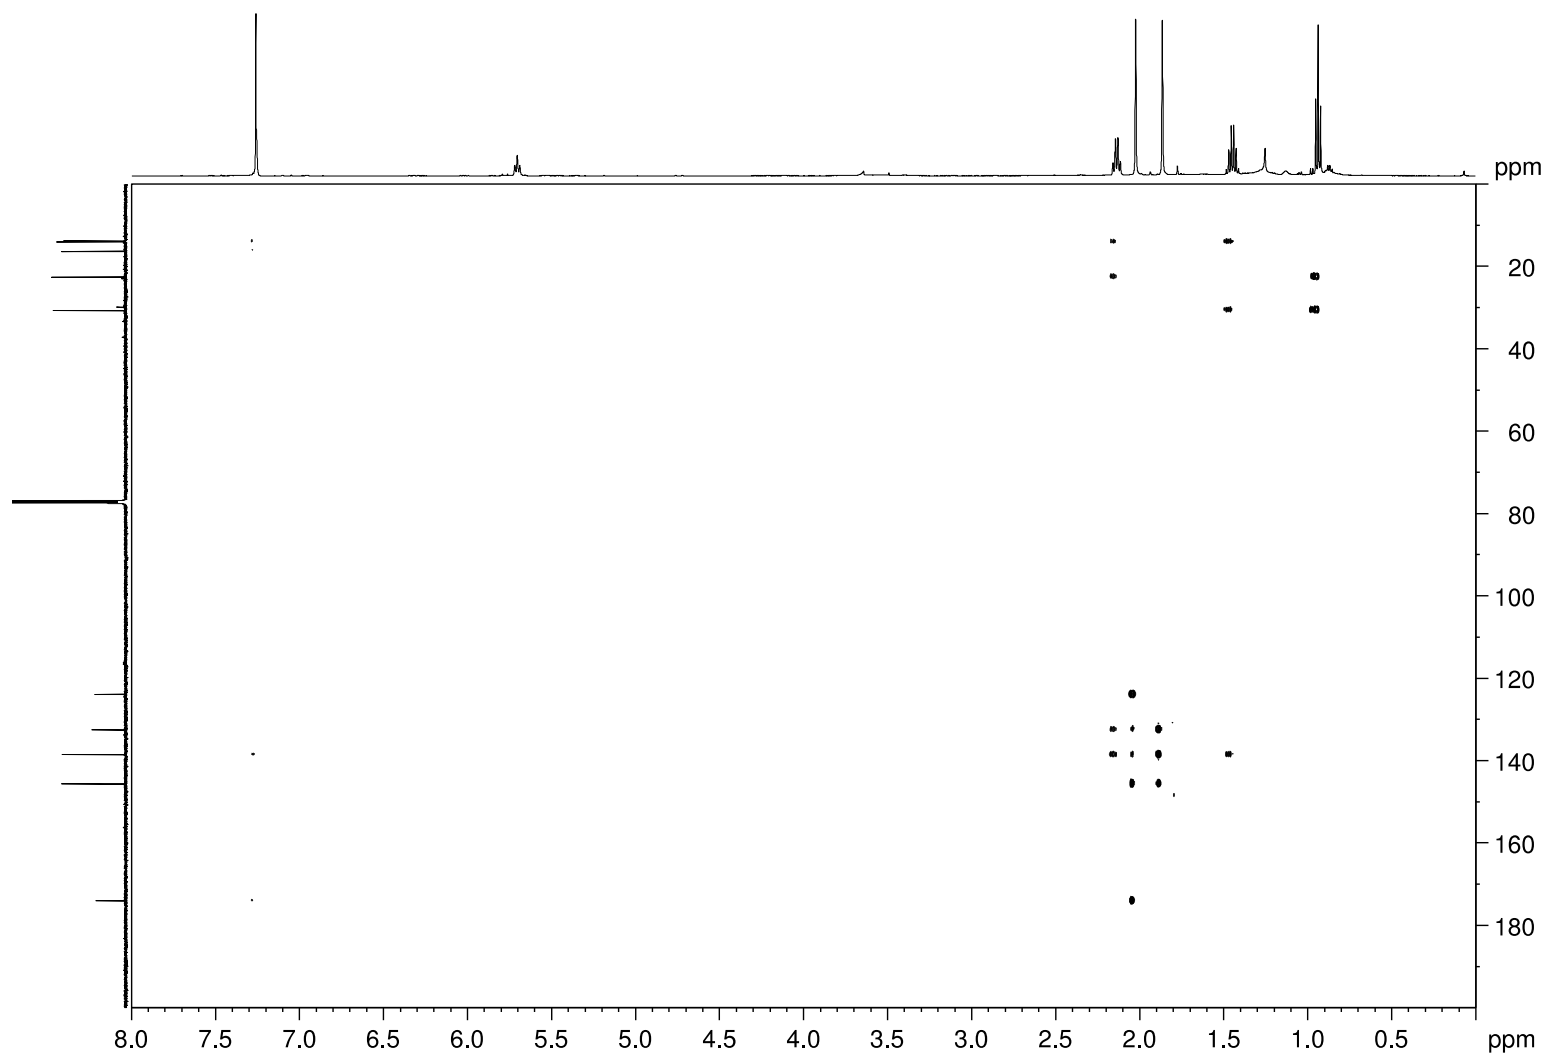



**Figure S6.** NOESY spectrum of **1** (500 MHz, CDCl<sub>3</sub>).

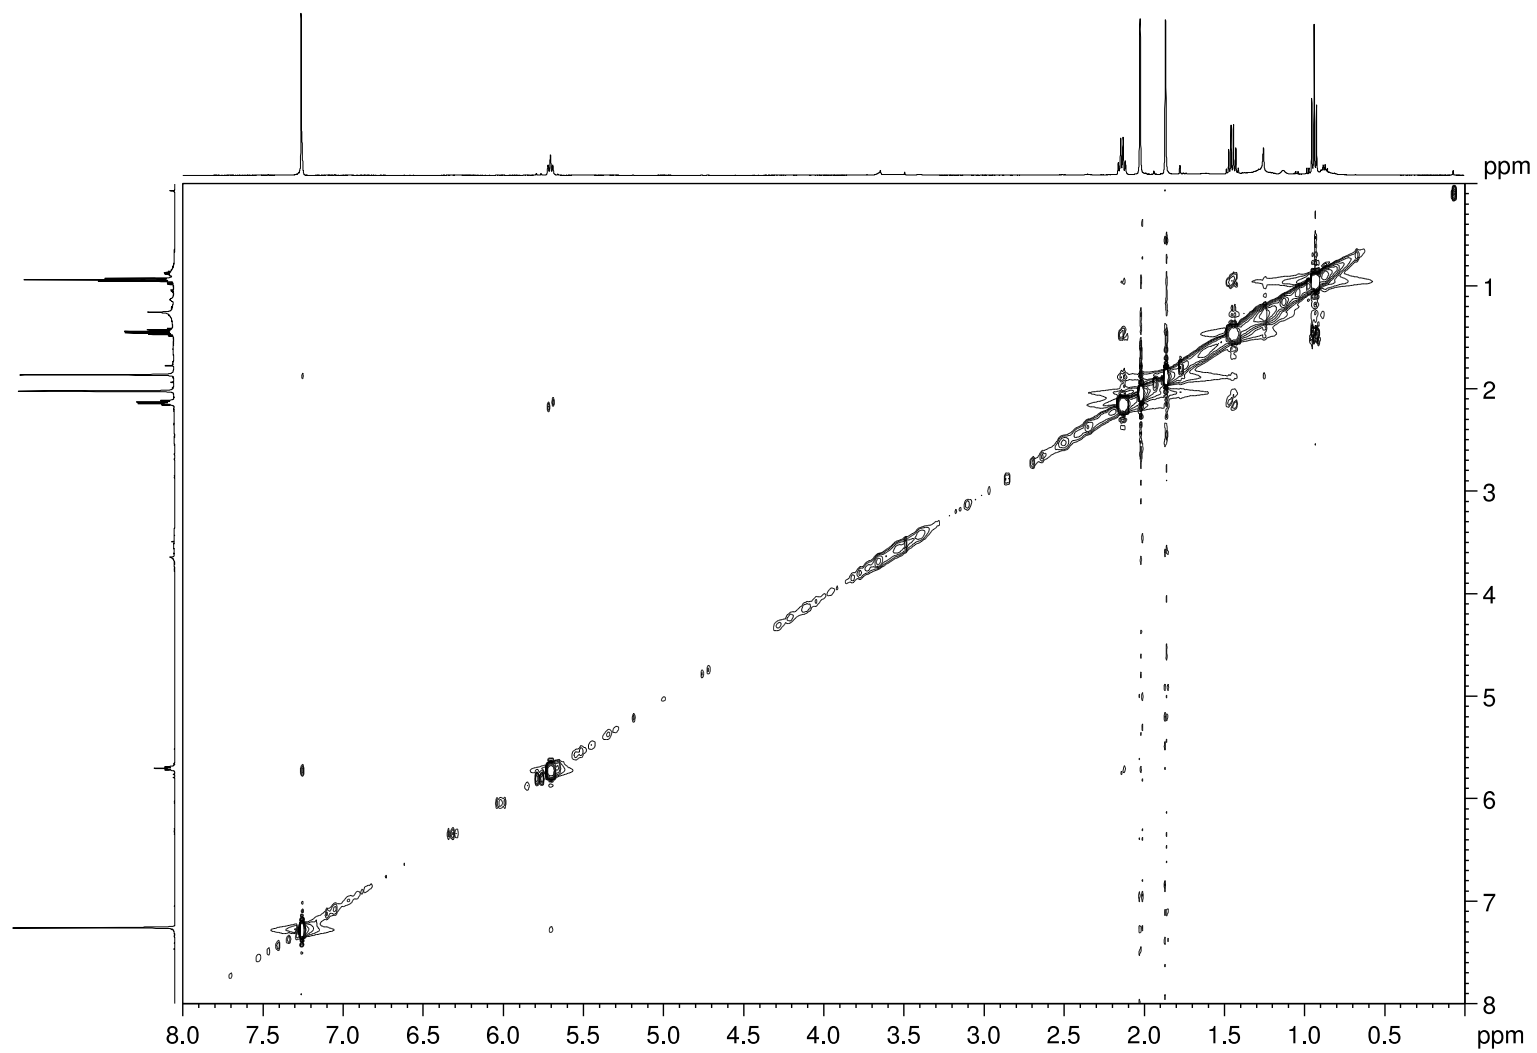

**Figure S7.**  $^1\text{H}$  NMR spectrum of compound **2** (500 MHz,  $\text{CDCl}_3$ ).

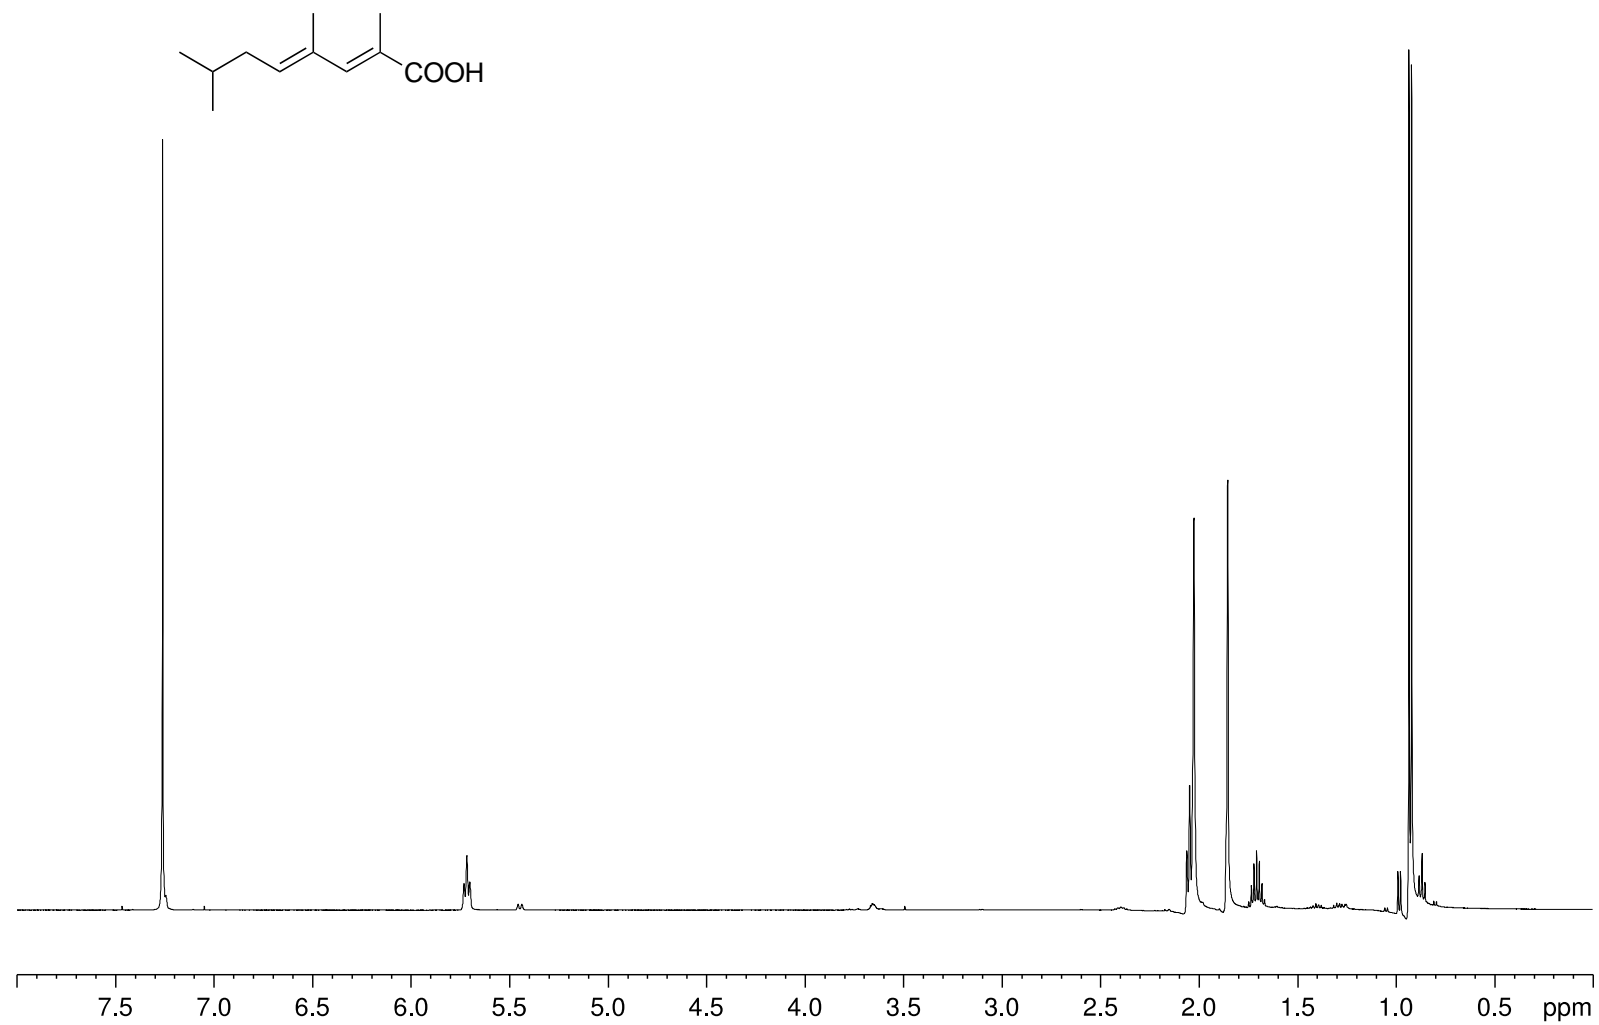

**Figure S8.**  $^{13}\text{C}$  NMR spectrum of **2** (125 MHz,  $\text{CDCl}_3$ ).

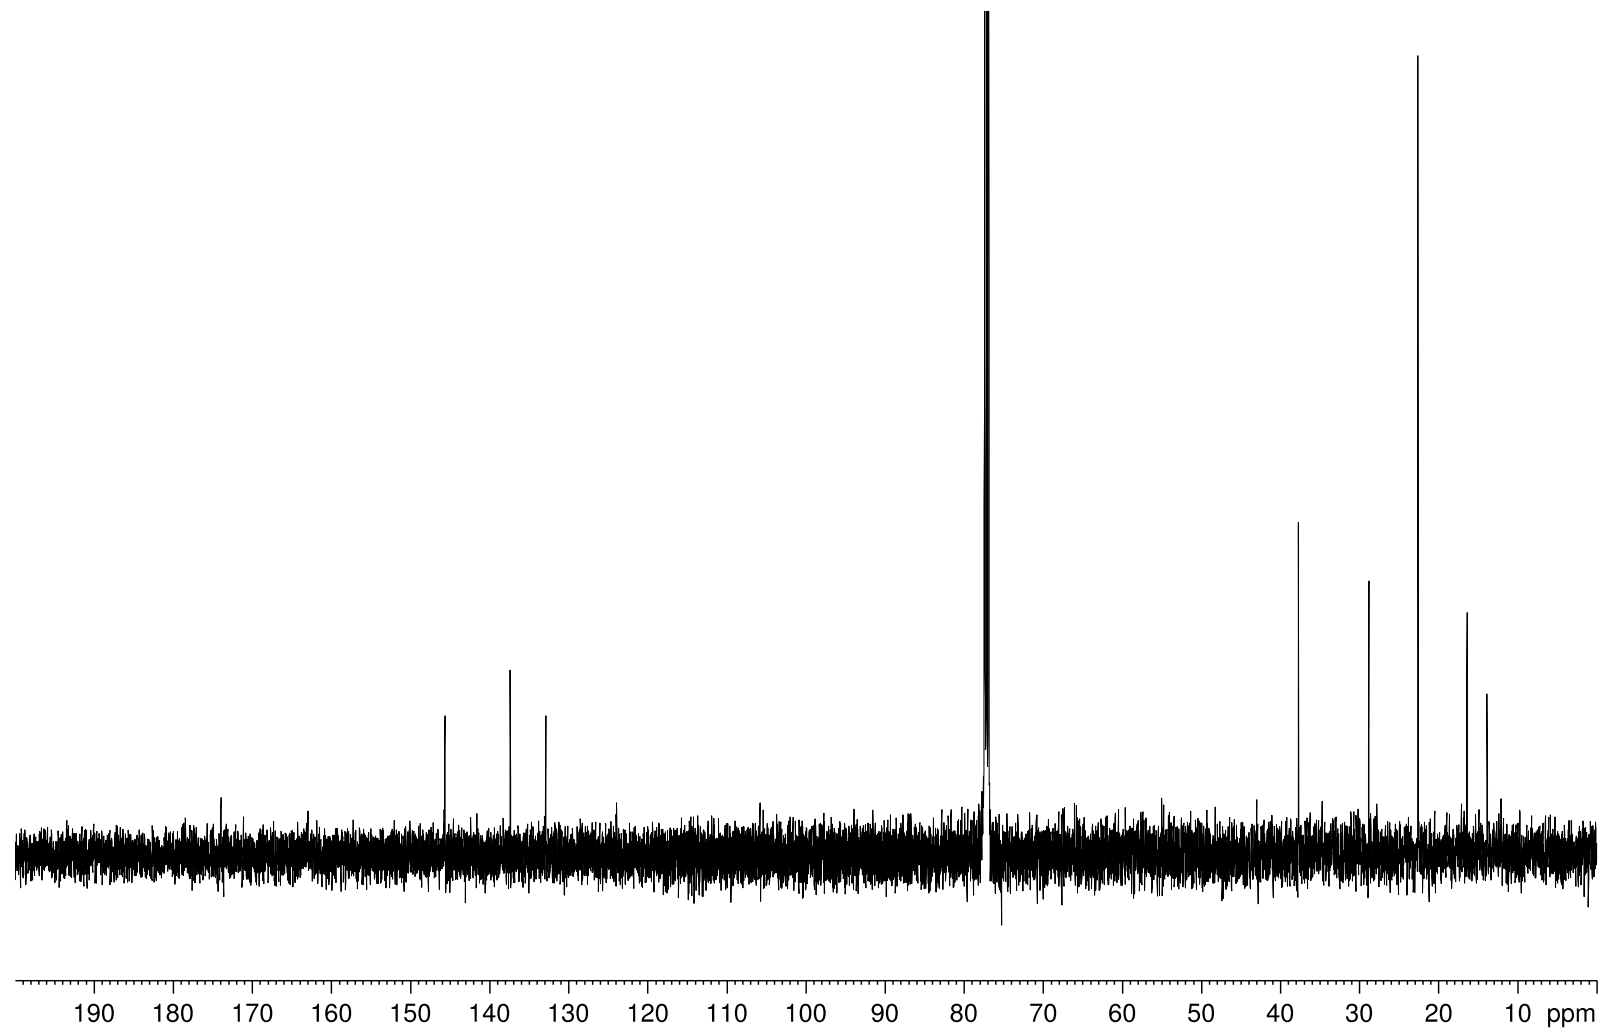

**Figure S9.**  $^1\text{H}$ - $^1\text{H}$  COSY spectrum of **2** (500 MHz,  $\text{CDCl}_3$ ).

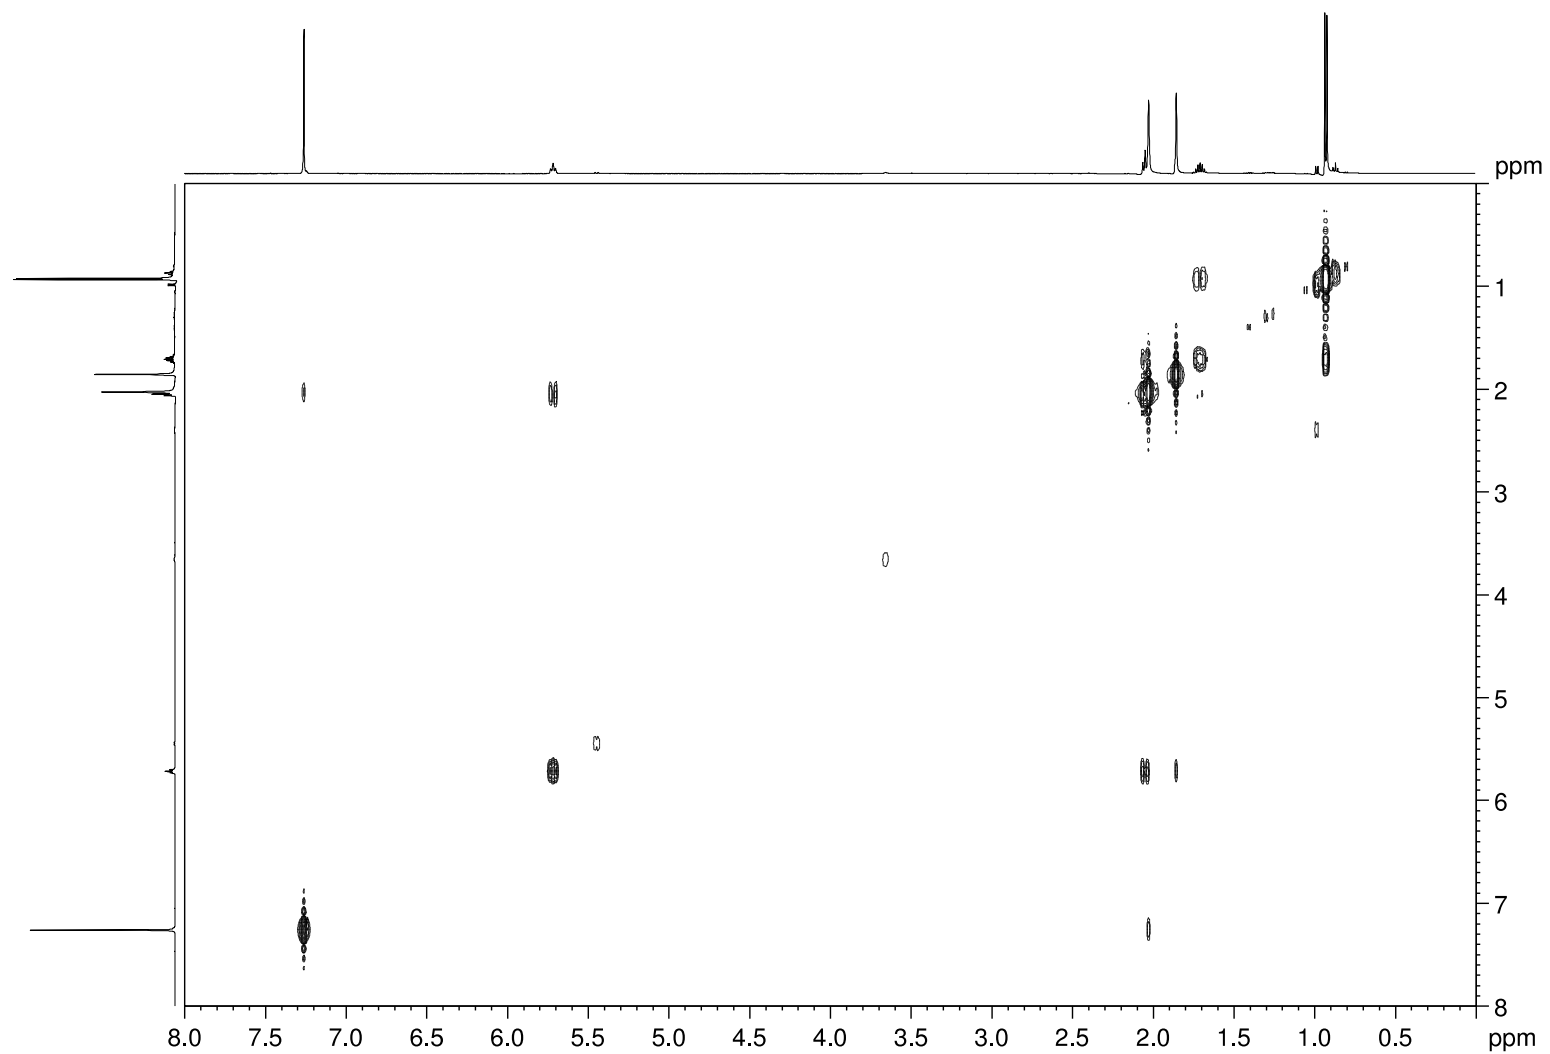

**Figure S10.** HSQC spectrum of **2** (500 MHz, CDCl<sub>3</sub>).

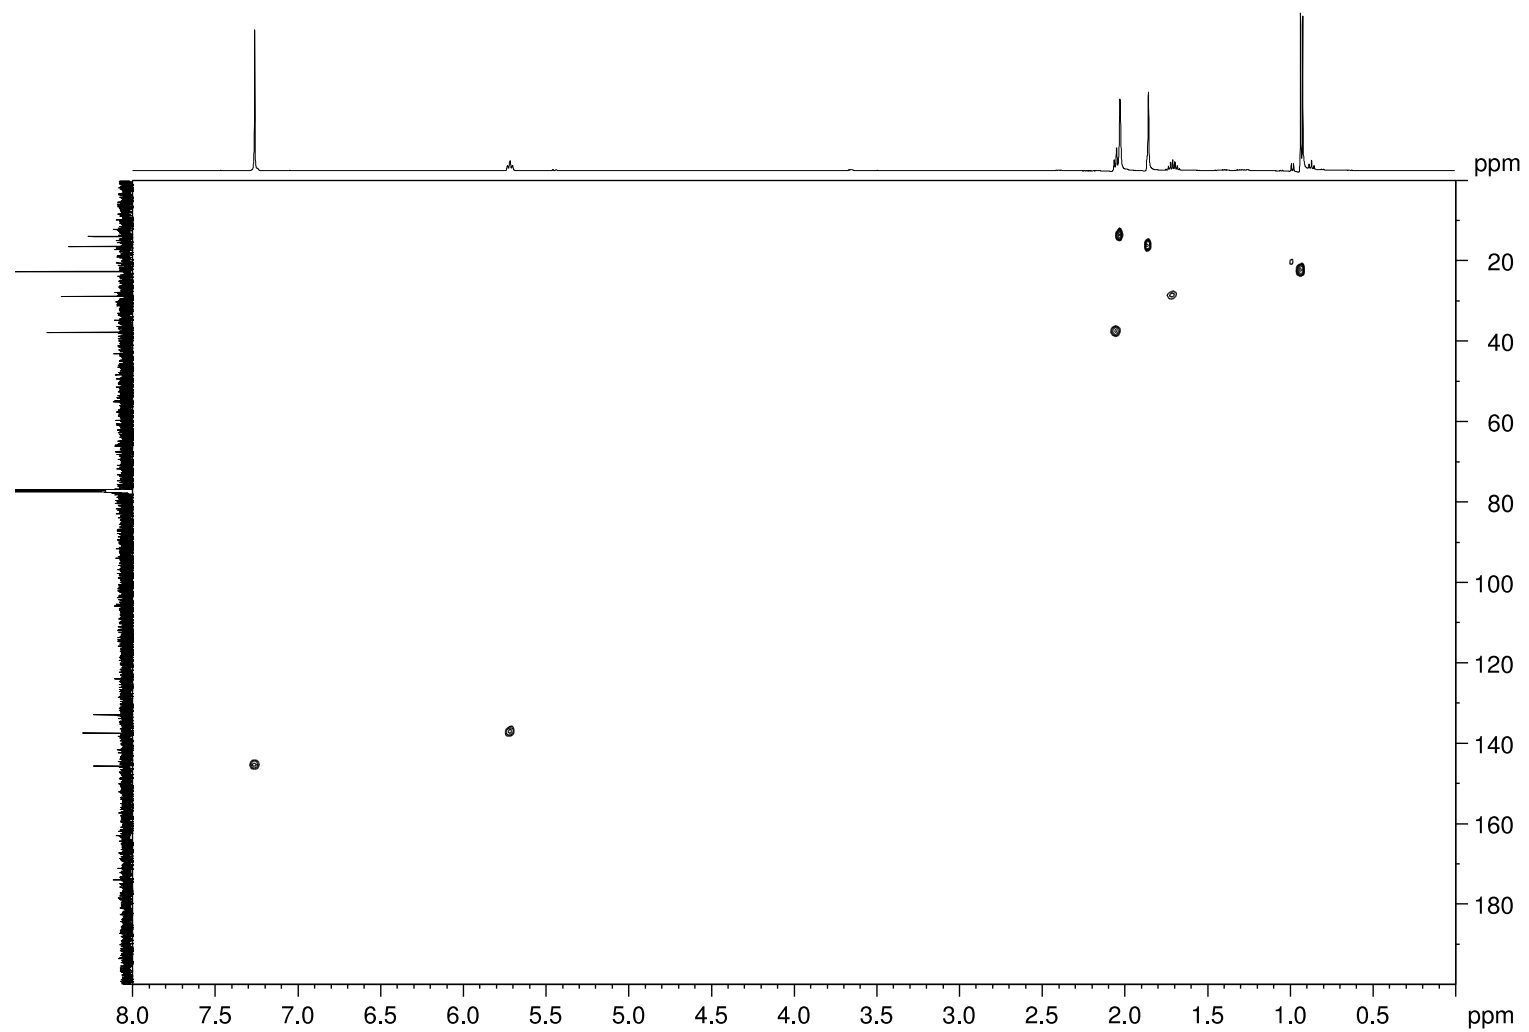

**Figure S11.** HMBC spectrum of **2** (500 MHz, CDCl<sub>3</sub>).

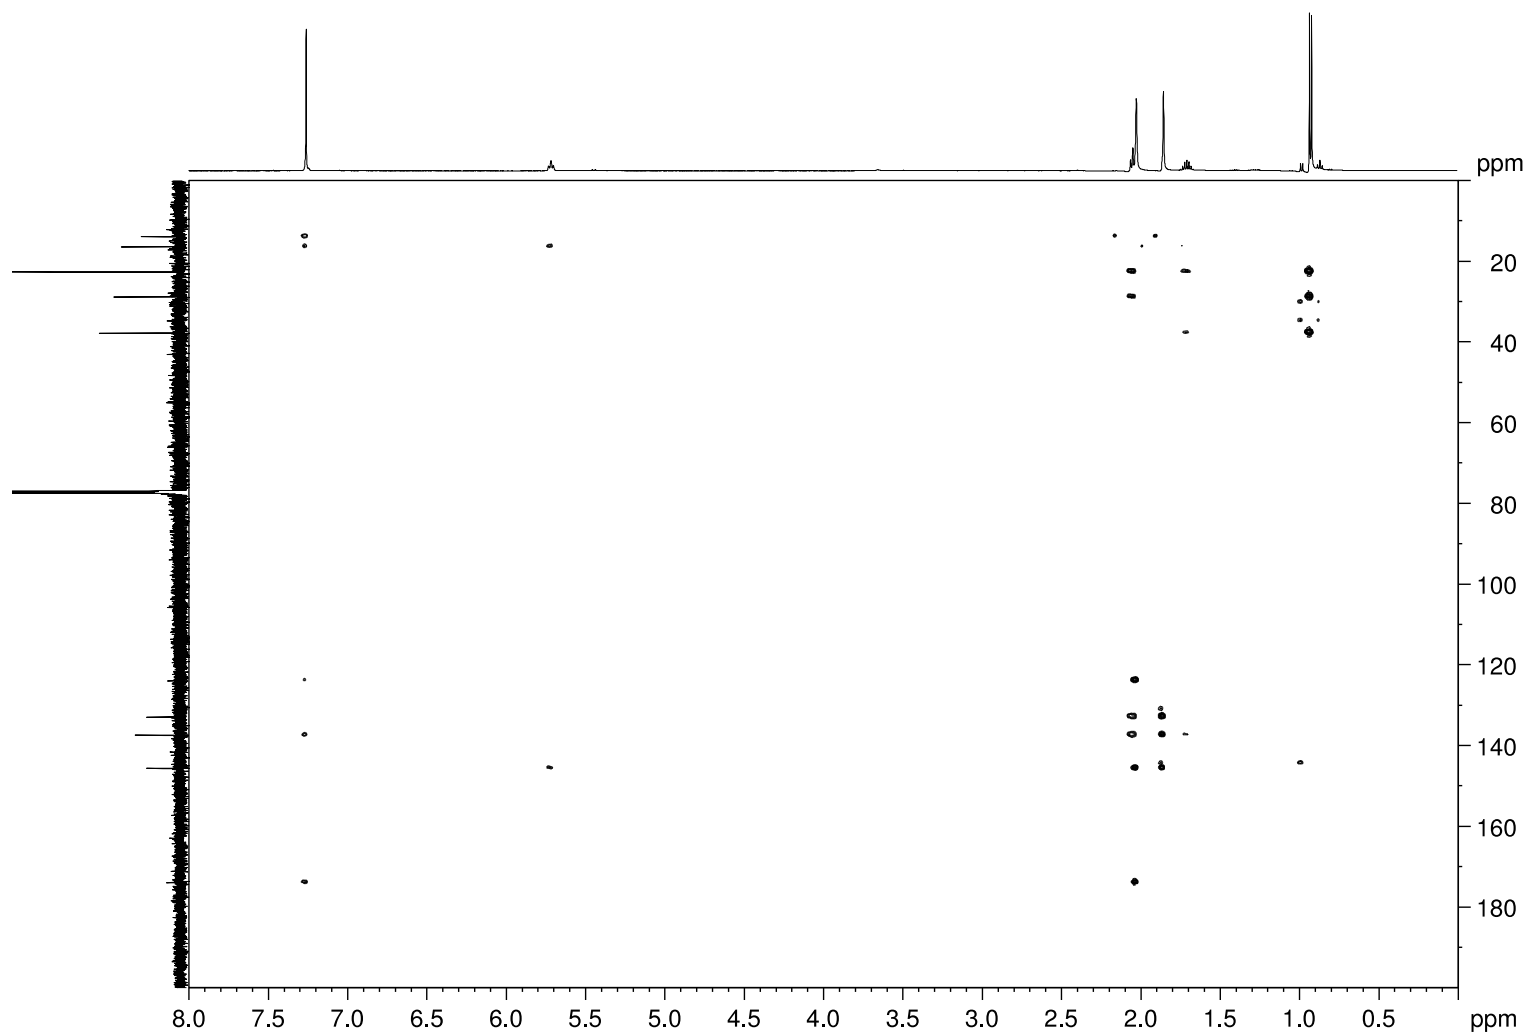

**Figure S12.** NOESY spectrum of **2** (500 MHz, CDCl<sub>3</sub>).

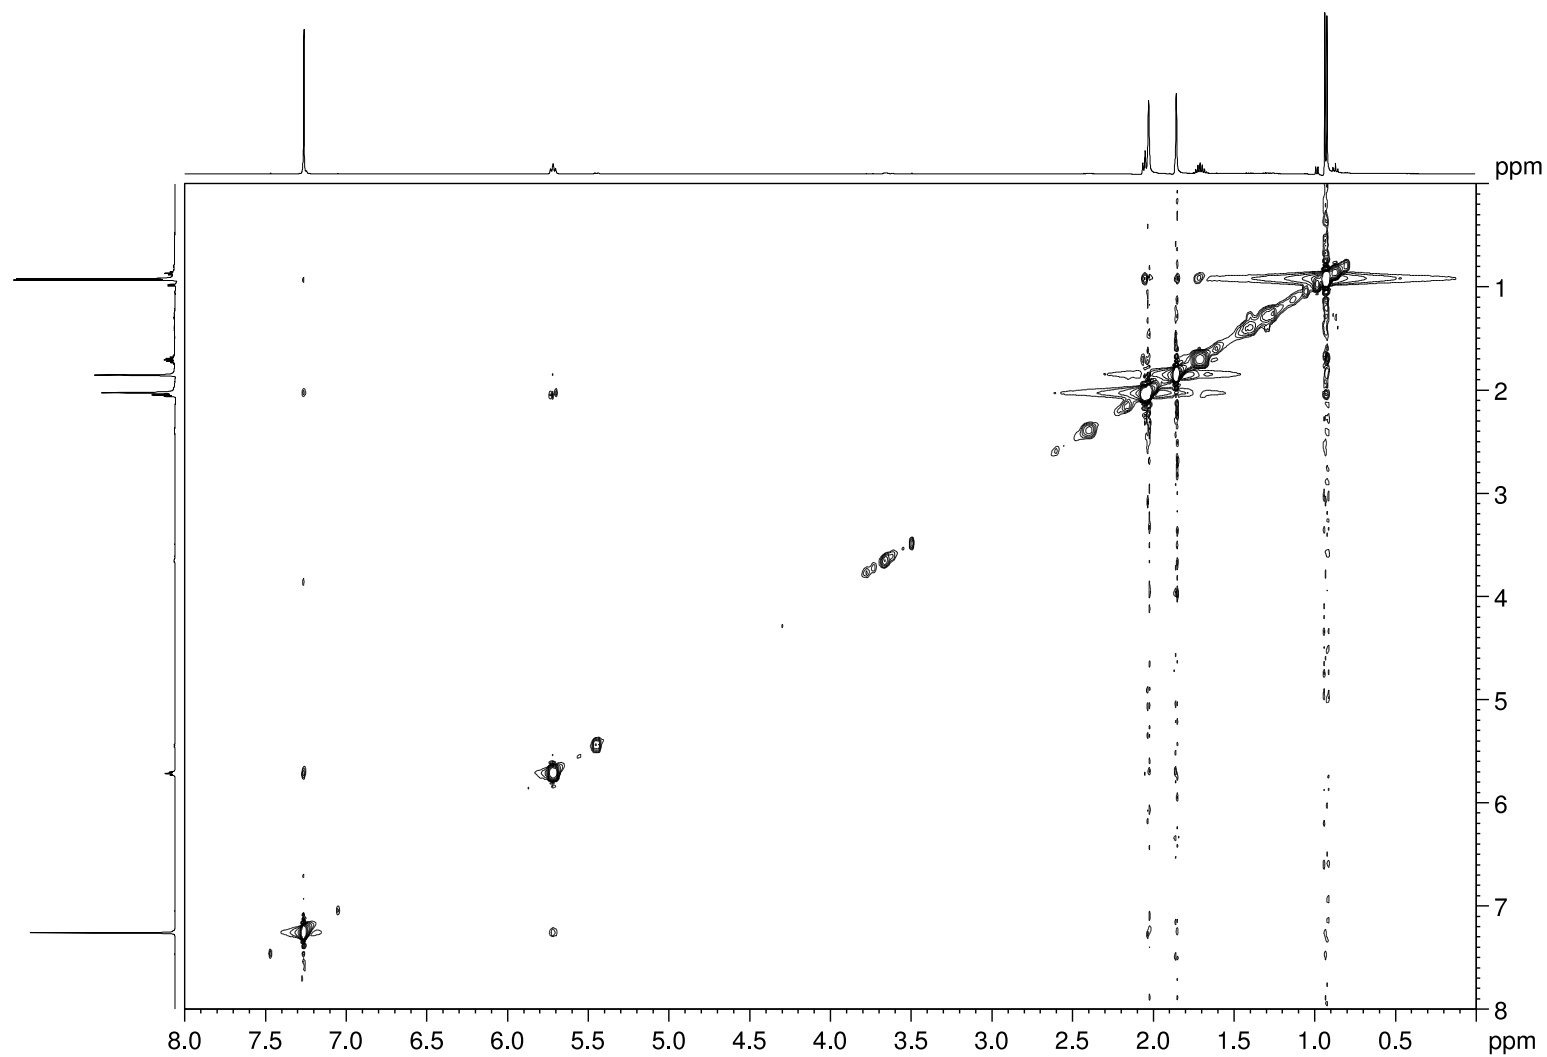

**Figure S13.**  $^1\text{H}$  NMR spectrum of compound **3** (500 MHz,  $\text{CDCl}_3$ ).

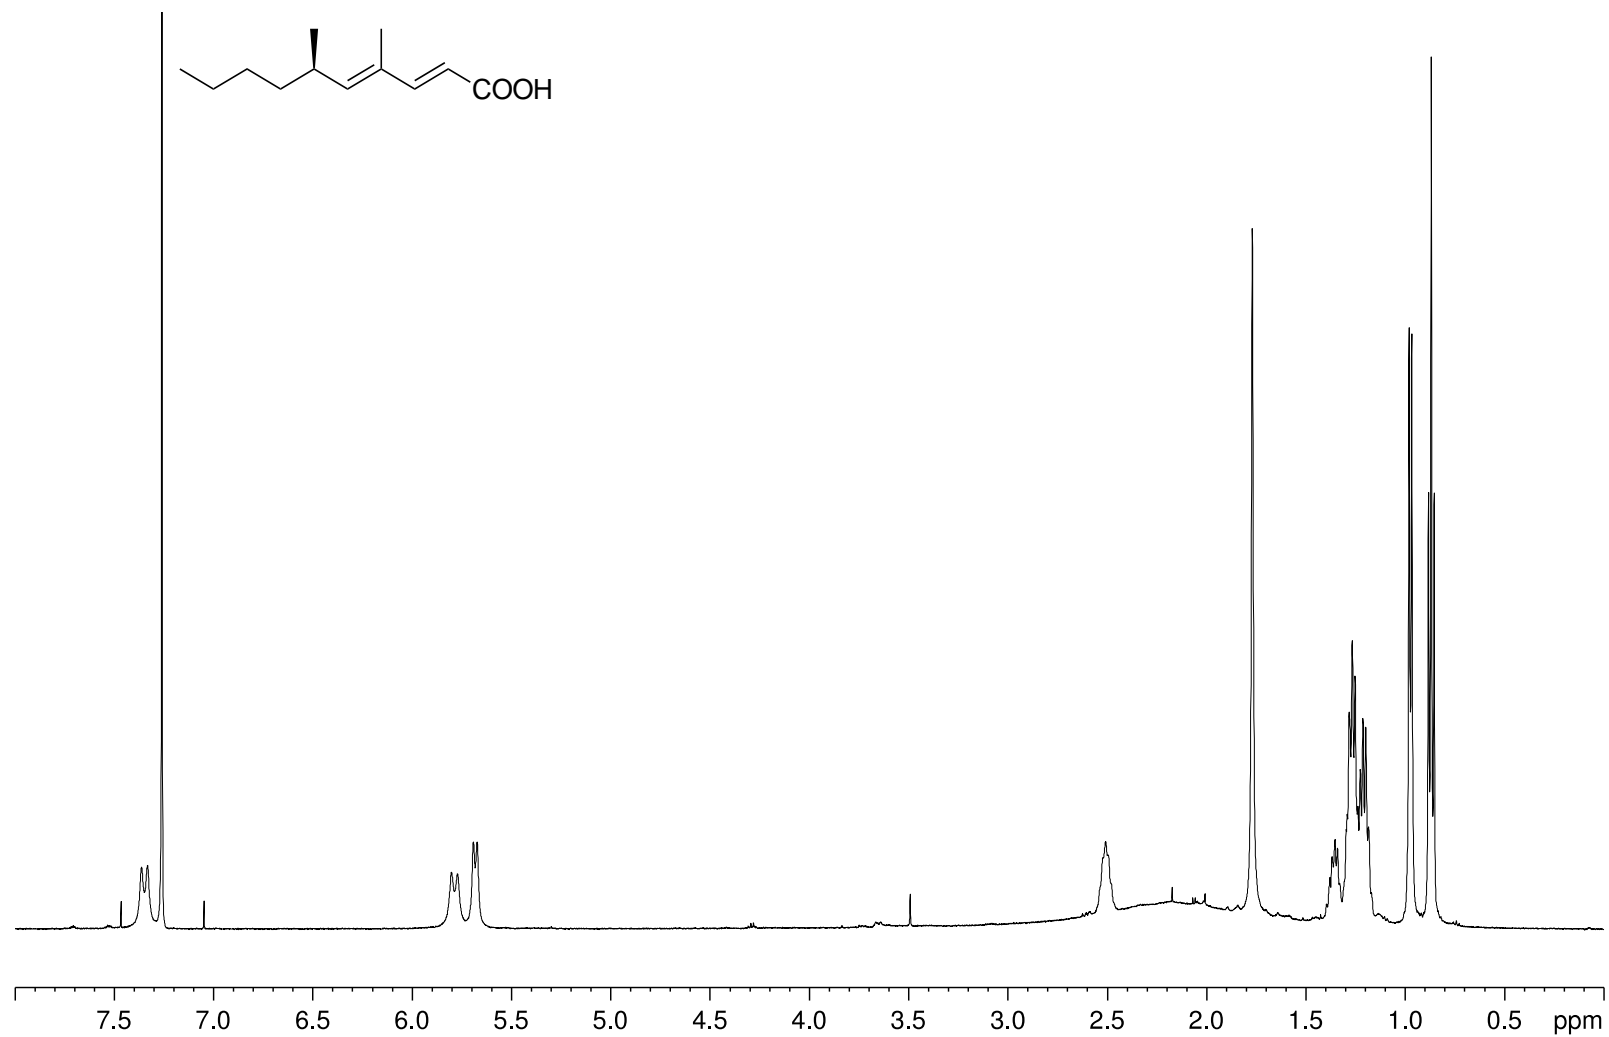



**Figure S14.**  $^{13}\text{C}$  NMR spectrum of **3** (125 MHz,  $\text{CDCl}_3$ ).

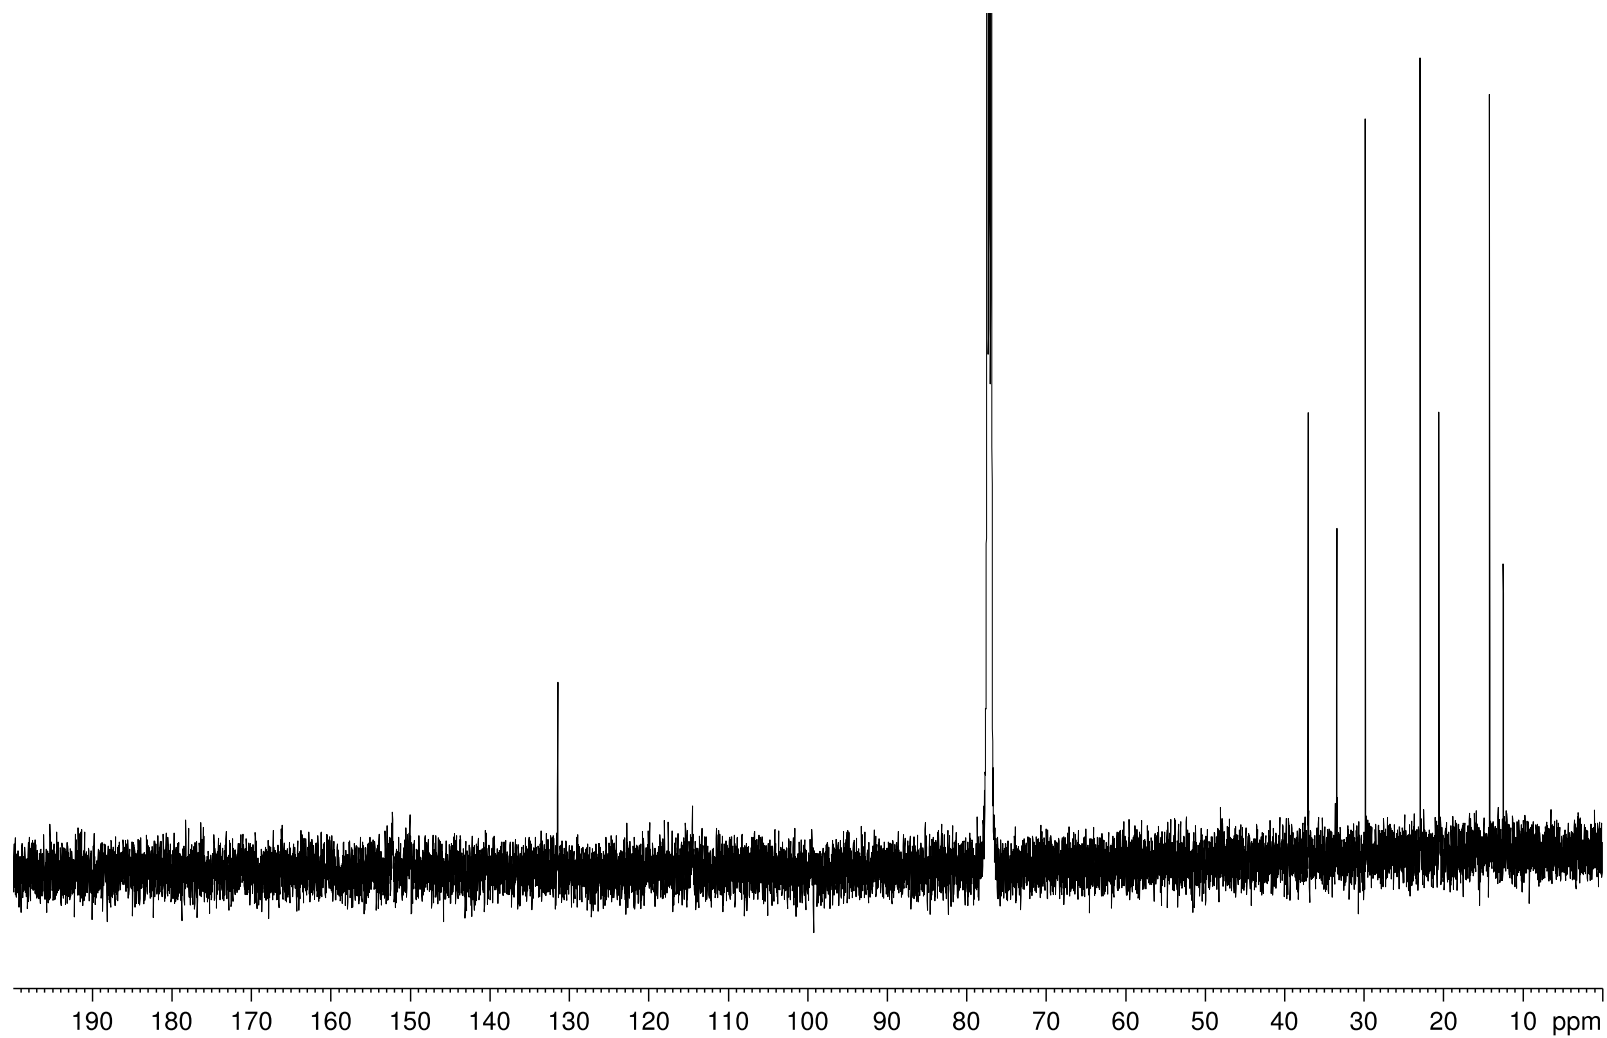

**Figure S15.**  $^1\text{H}$ - $^1\text{H}$  COSY spectrum of **3** (500 MHz,  $\text{CDCl}_3$ ).

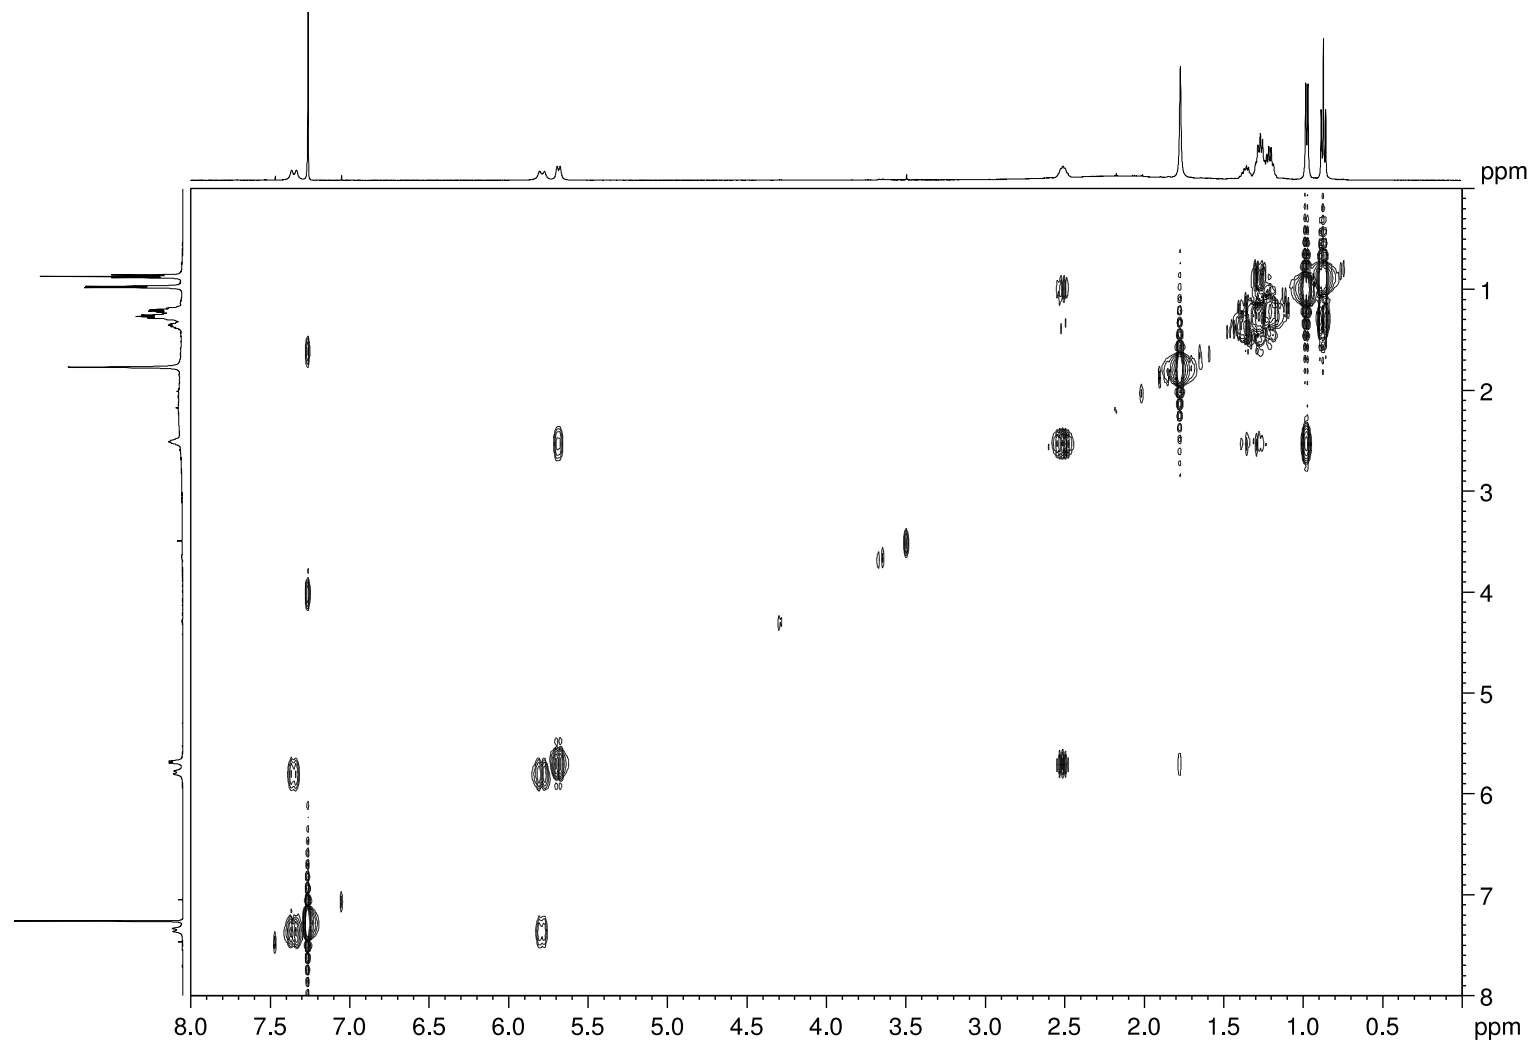

**Figure S16.** HSQC spectrum of **3** (500 MHz, CDCl<sub>3</sub>).

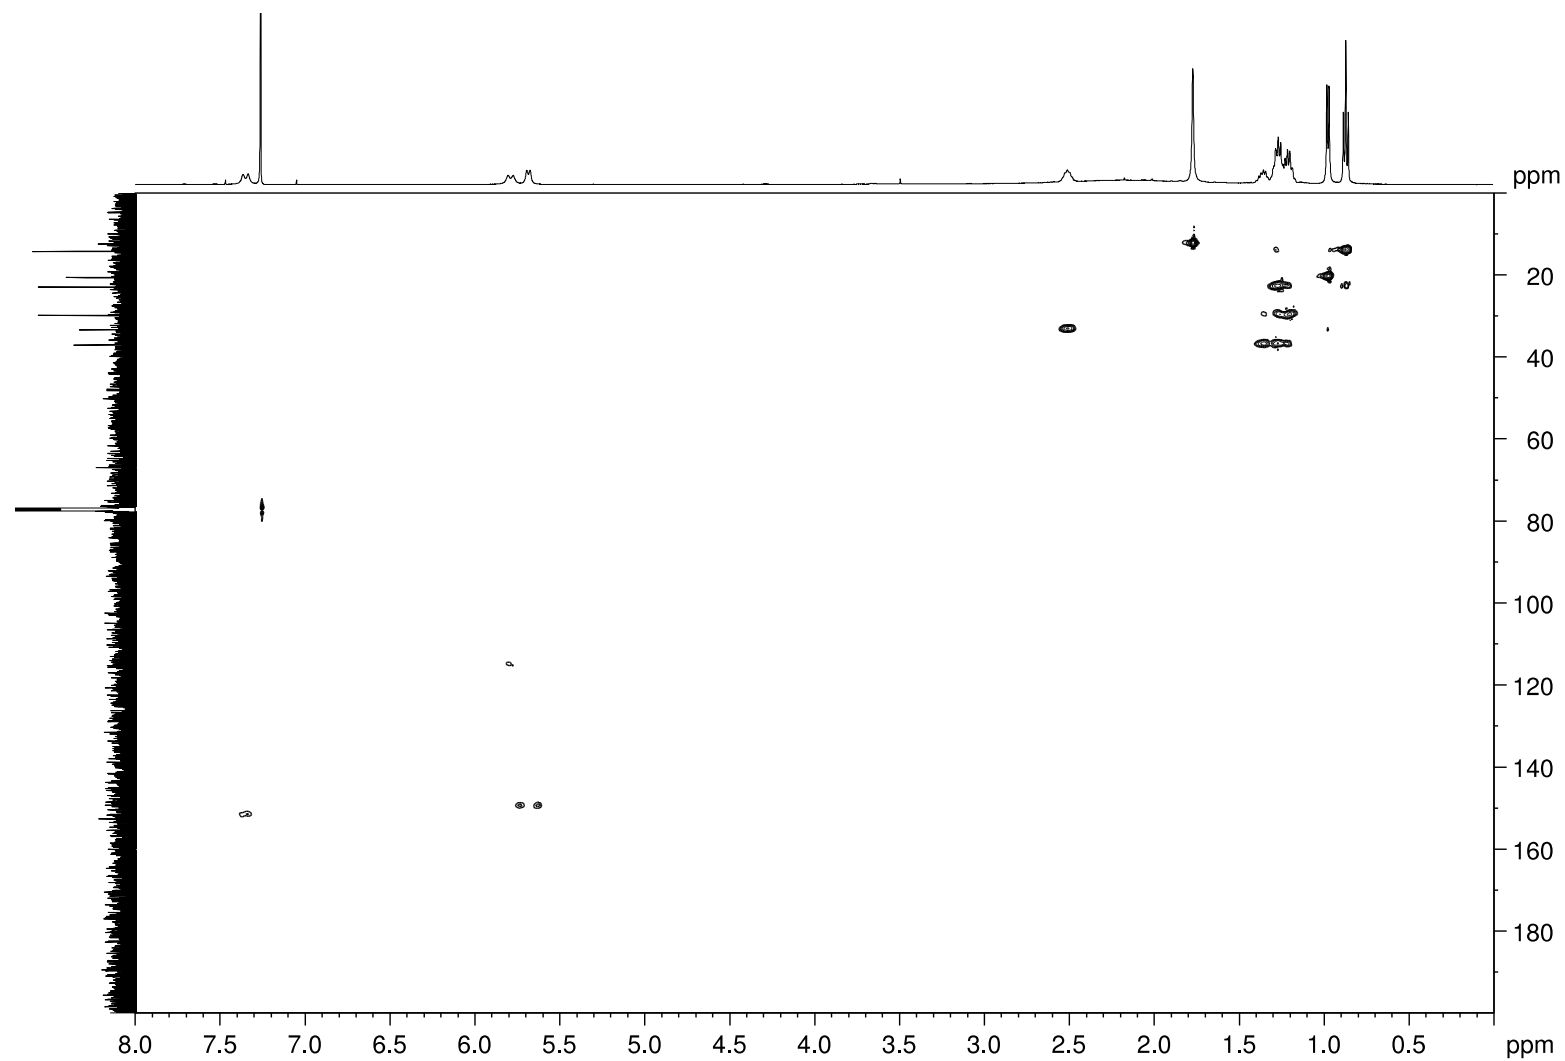

**Figure S17.** HMBC spectrum of **3** (500 MHz, CDCl<sub>3</sub>).

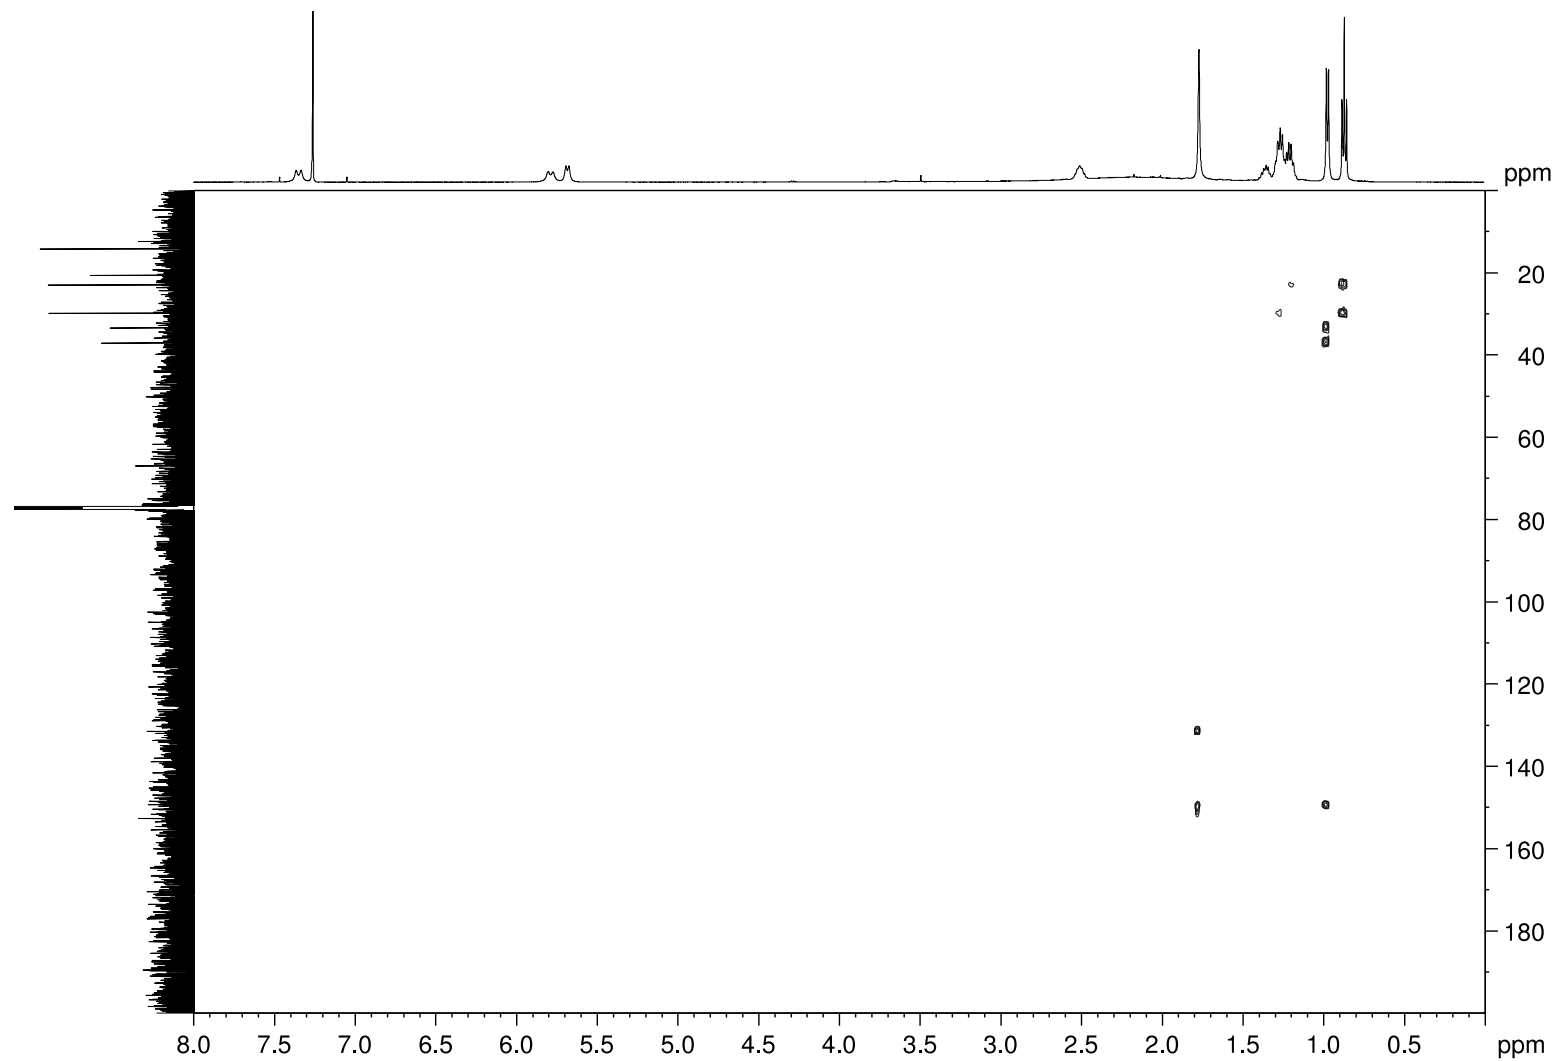

**Figure S18.** NOESY spectrum of **3** (500 MHz, CDCl<sub>3</sub>).

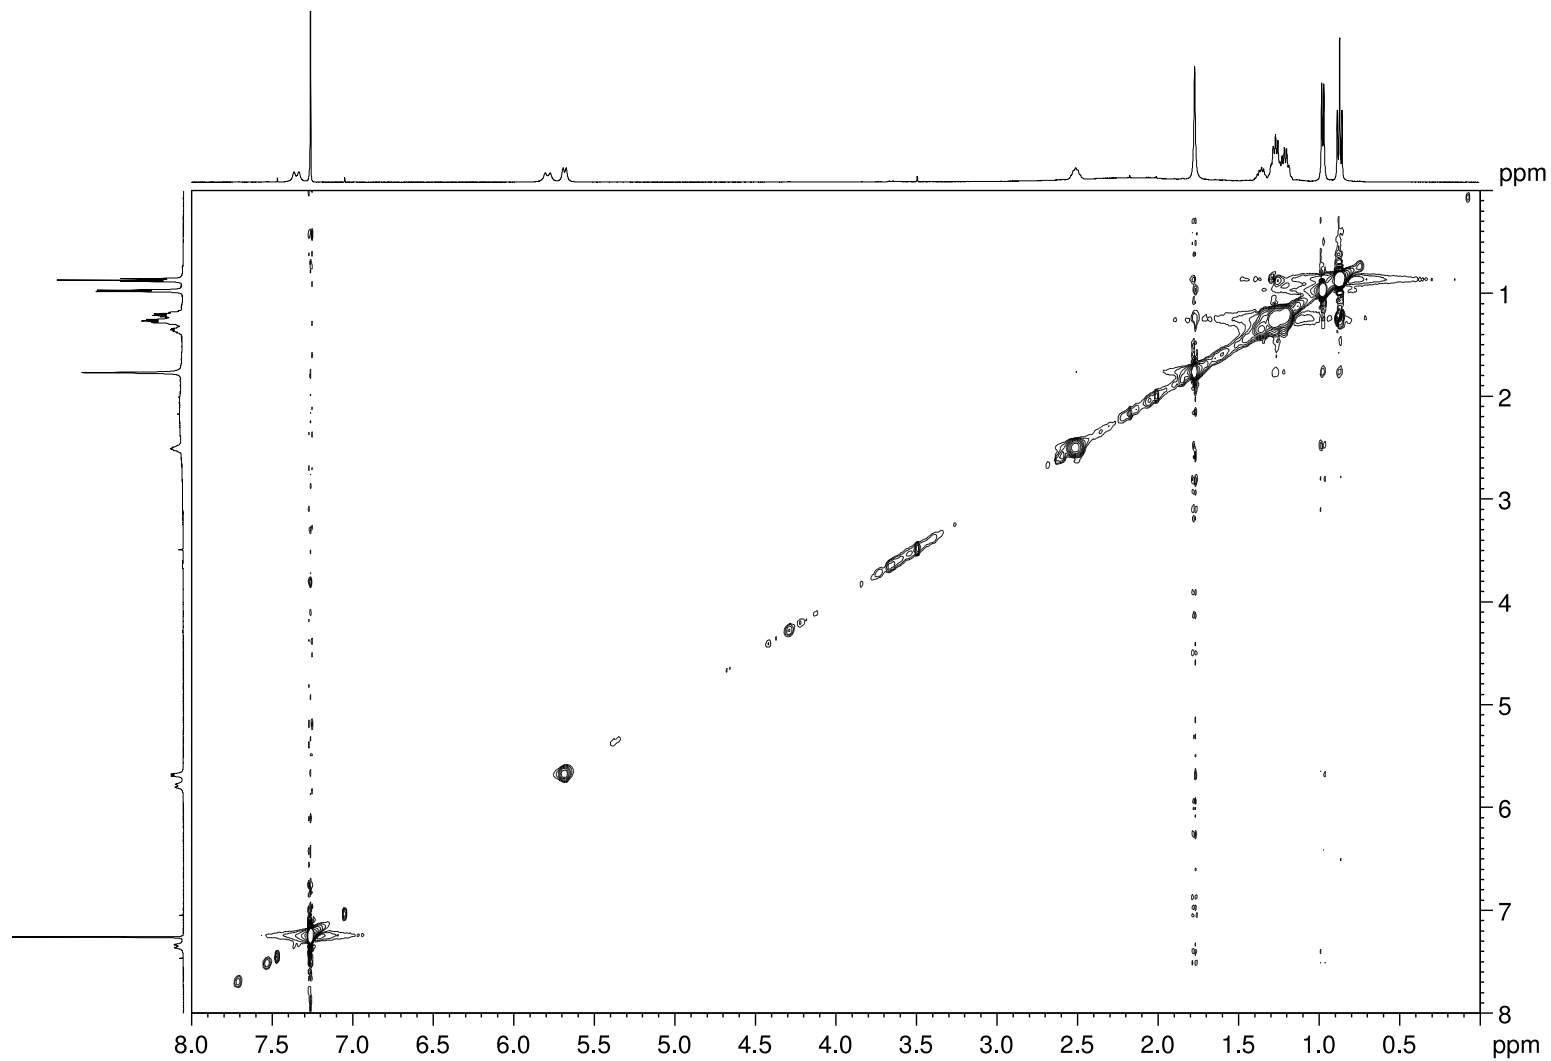

**Figure S19.**  $^1\text{H}$  NMR spectrum of compound **4** (500 MHz,  $\text{CDCl}_3$ ).

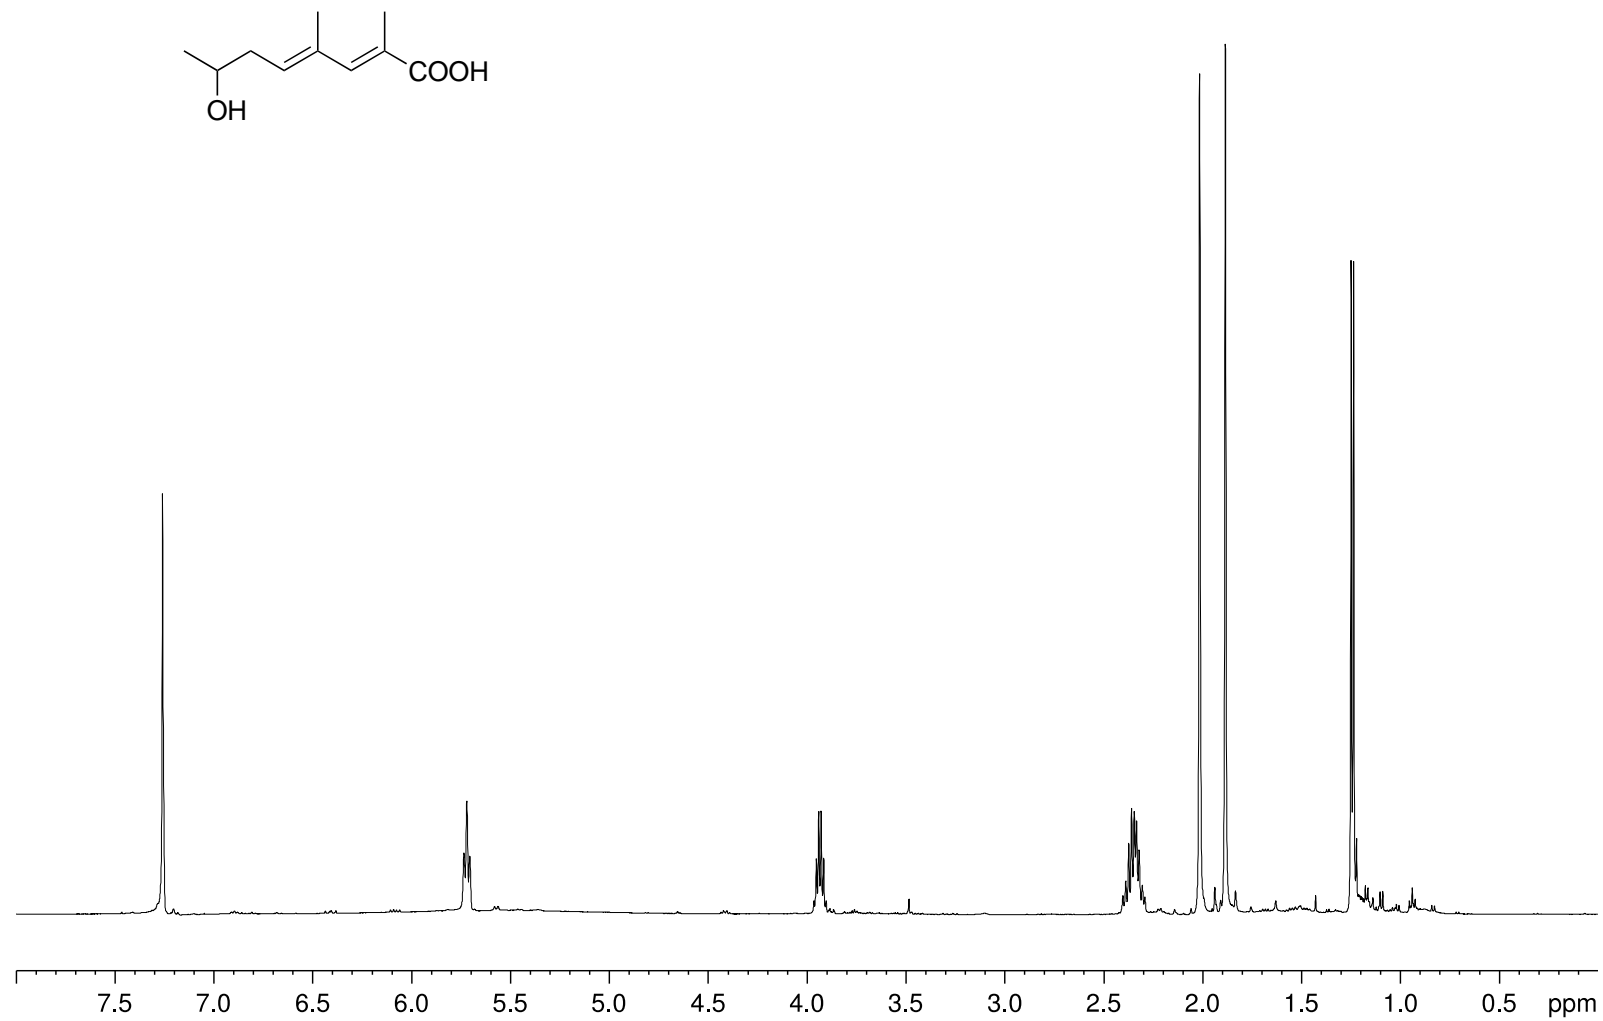

**Figure S20.**  $^{13}\text{C}$  NMR spectrum of **4** (125 MHz,  $\text{CDCl}_3$ ).

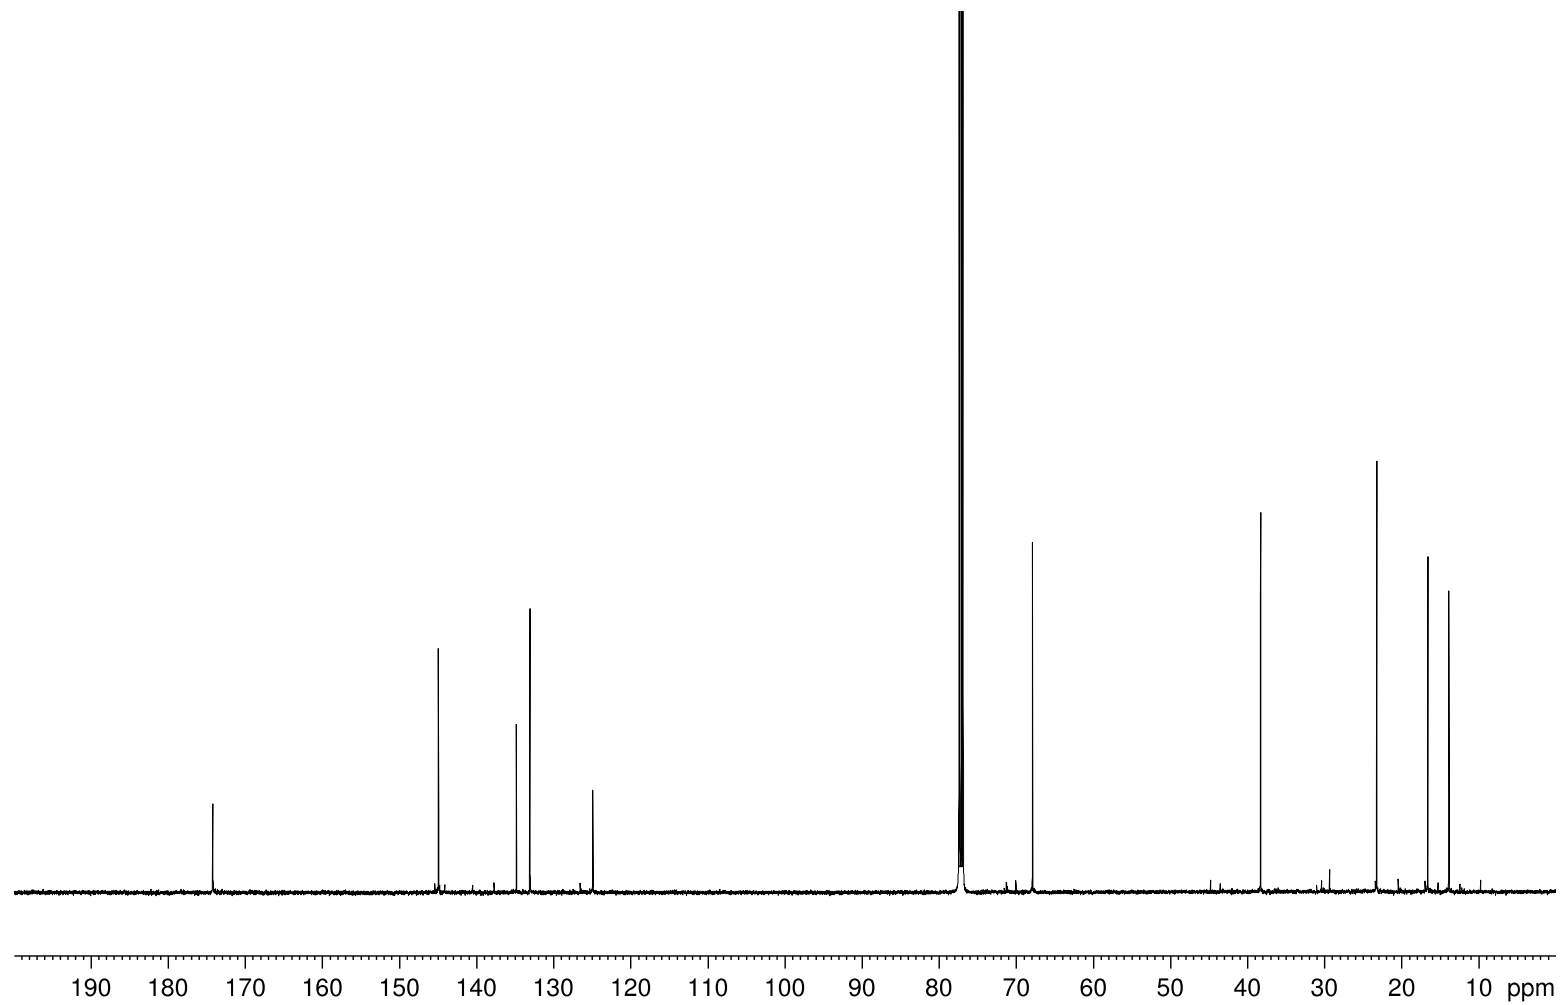

**Figure S21.**  $^1\text{H}$ - $^1\text{H}$  COSY spectrum of **4** (500 MHz,  $\text{CDCl}_3$ ).

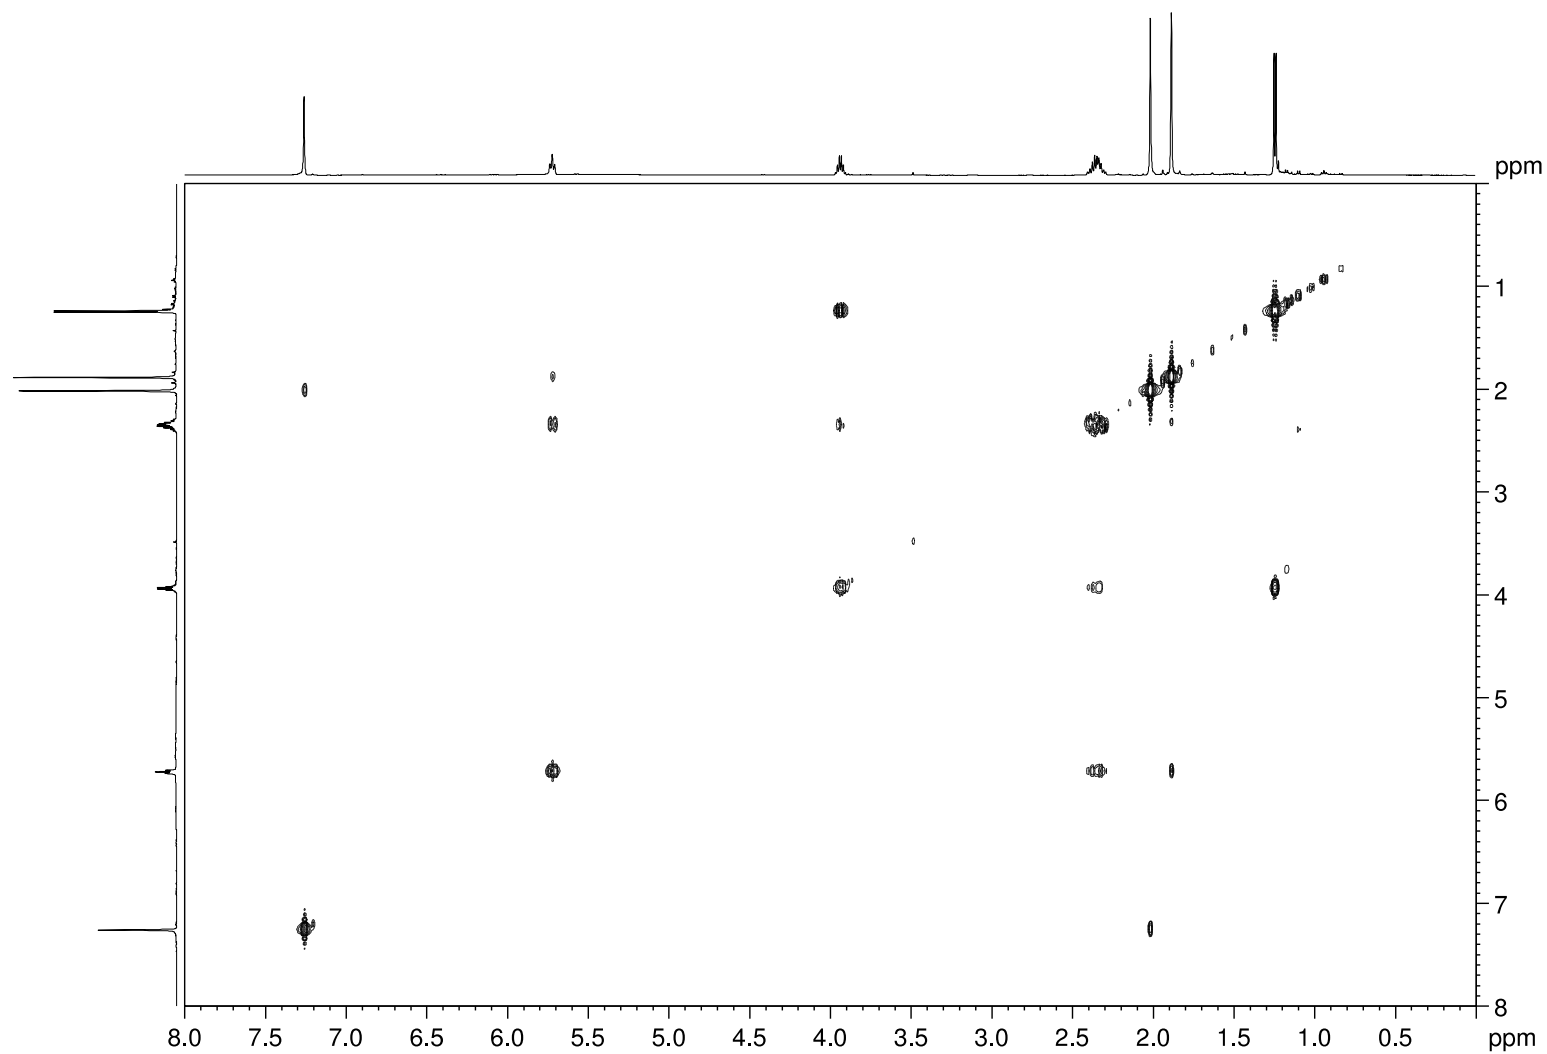



**Figure S22.** HSQC spectrum of **4** (500 MHz, CDCl<sub>3</sub>).

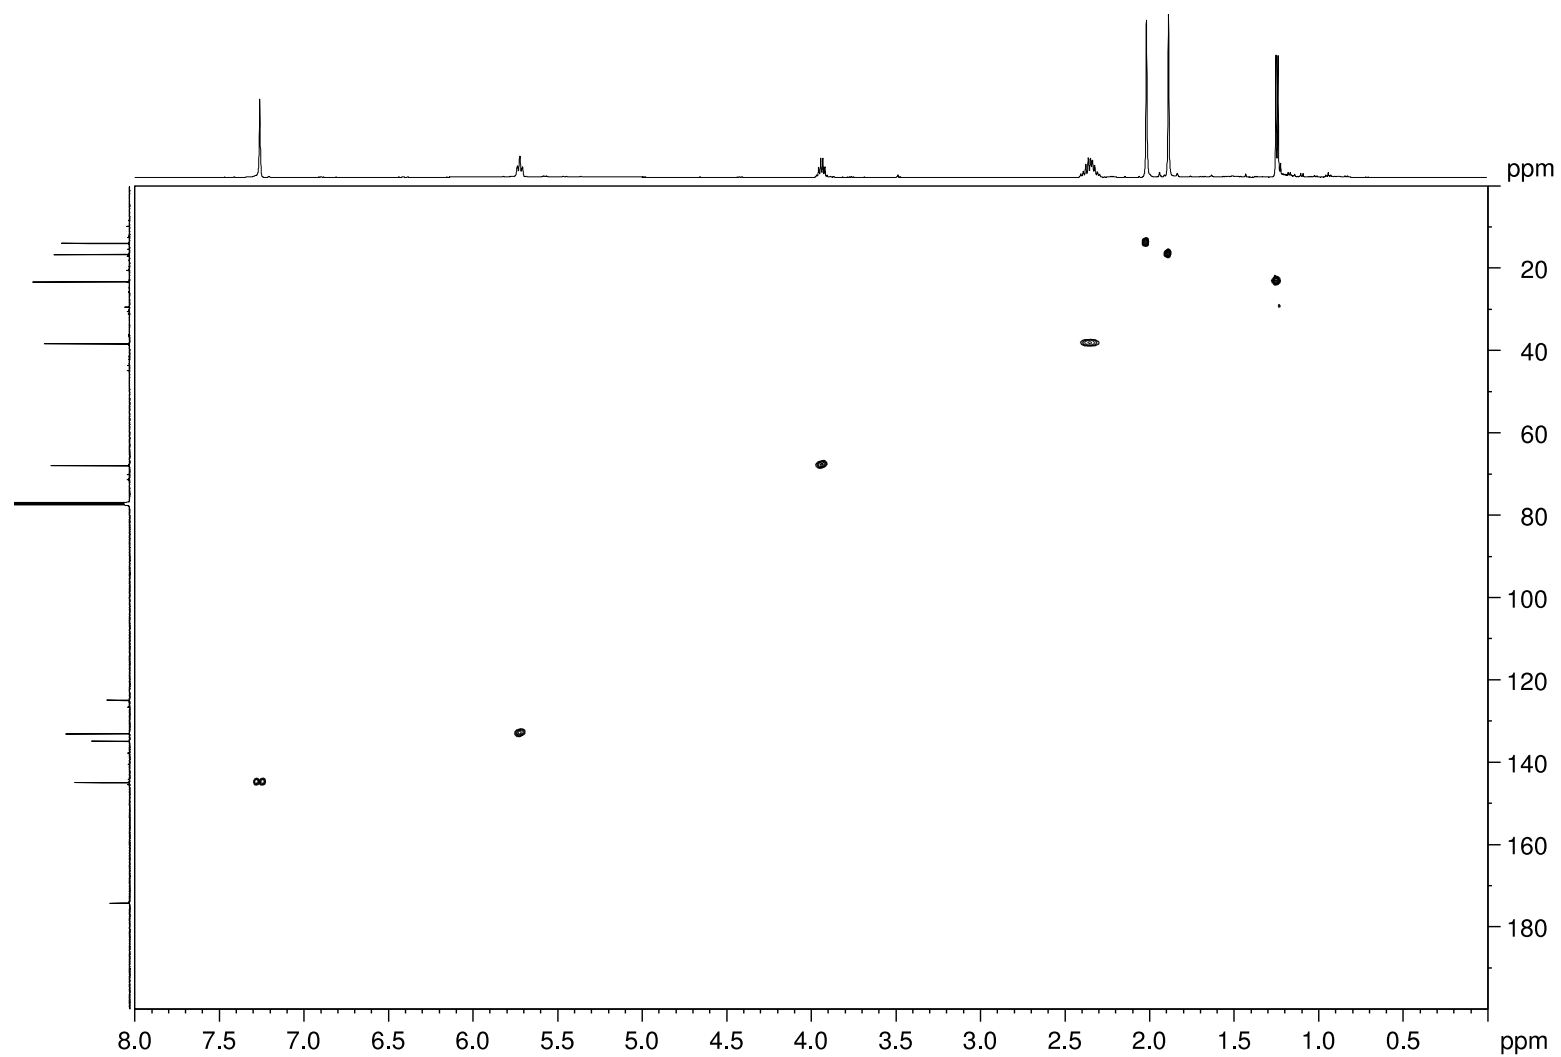

**Figure S23.** HMBC spectrum of **4** (500 MHz, CDCl<sub>3</sub>).

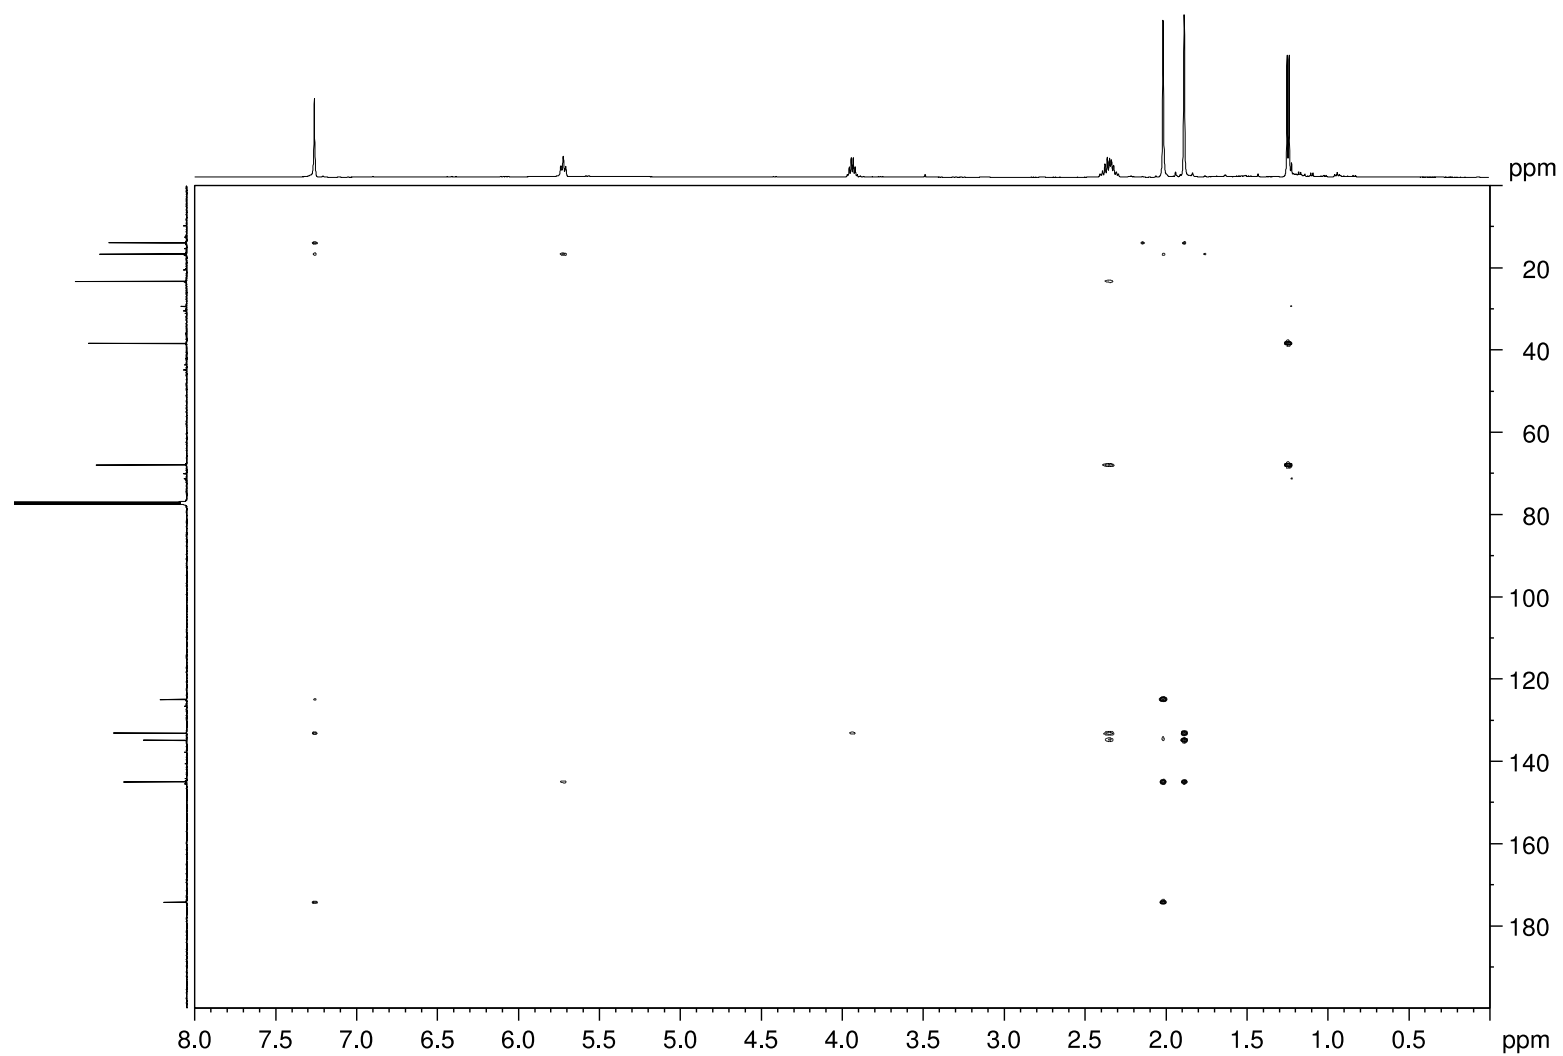

**Figure S24.** NOESY spectrum of **4** (500 MHz, CDCl<sub>3</sub>).

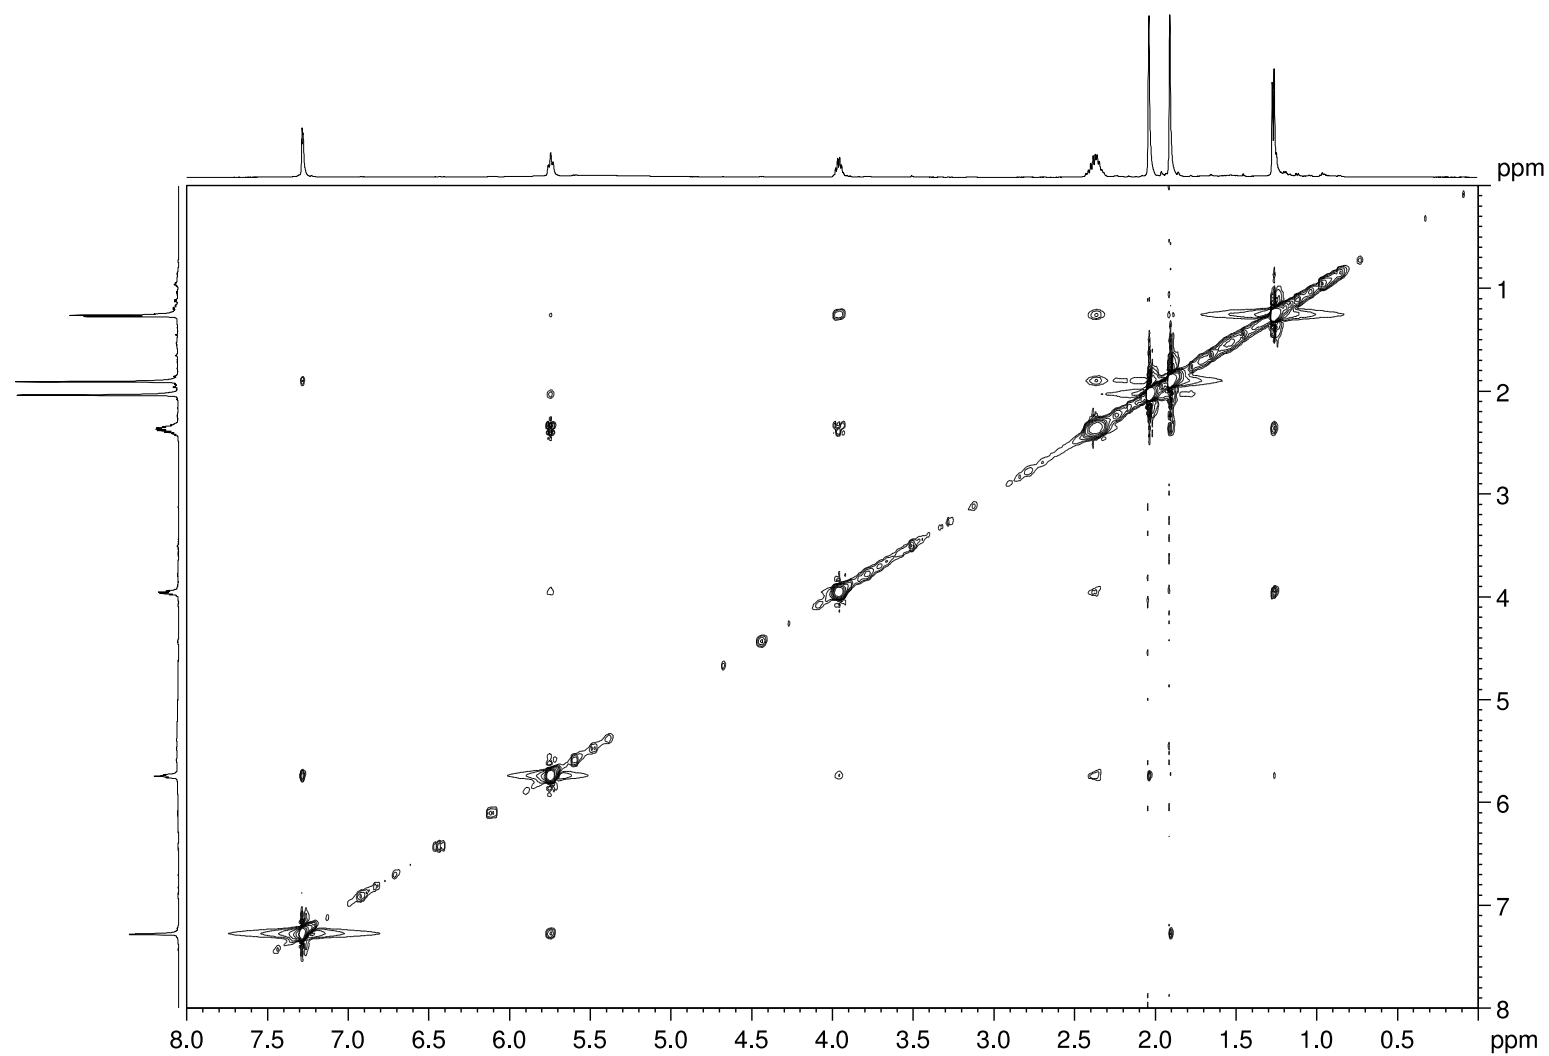

**Figure S25.**  $^1\text{H}$ - $^1\text{H}$  COSY spectrum of **4'a** (500 MHz,  $\text{CDCl}_3$ ).

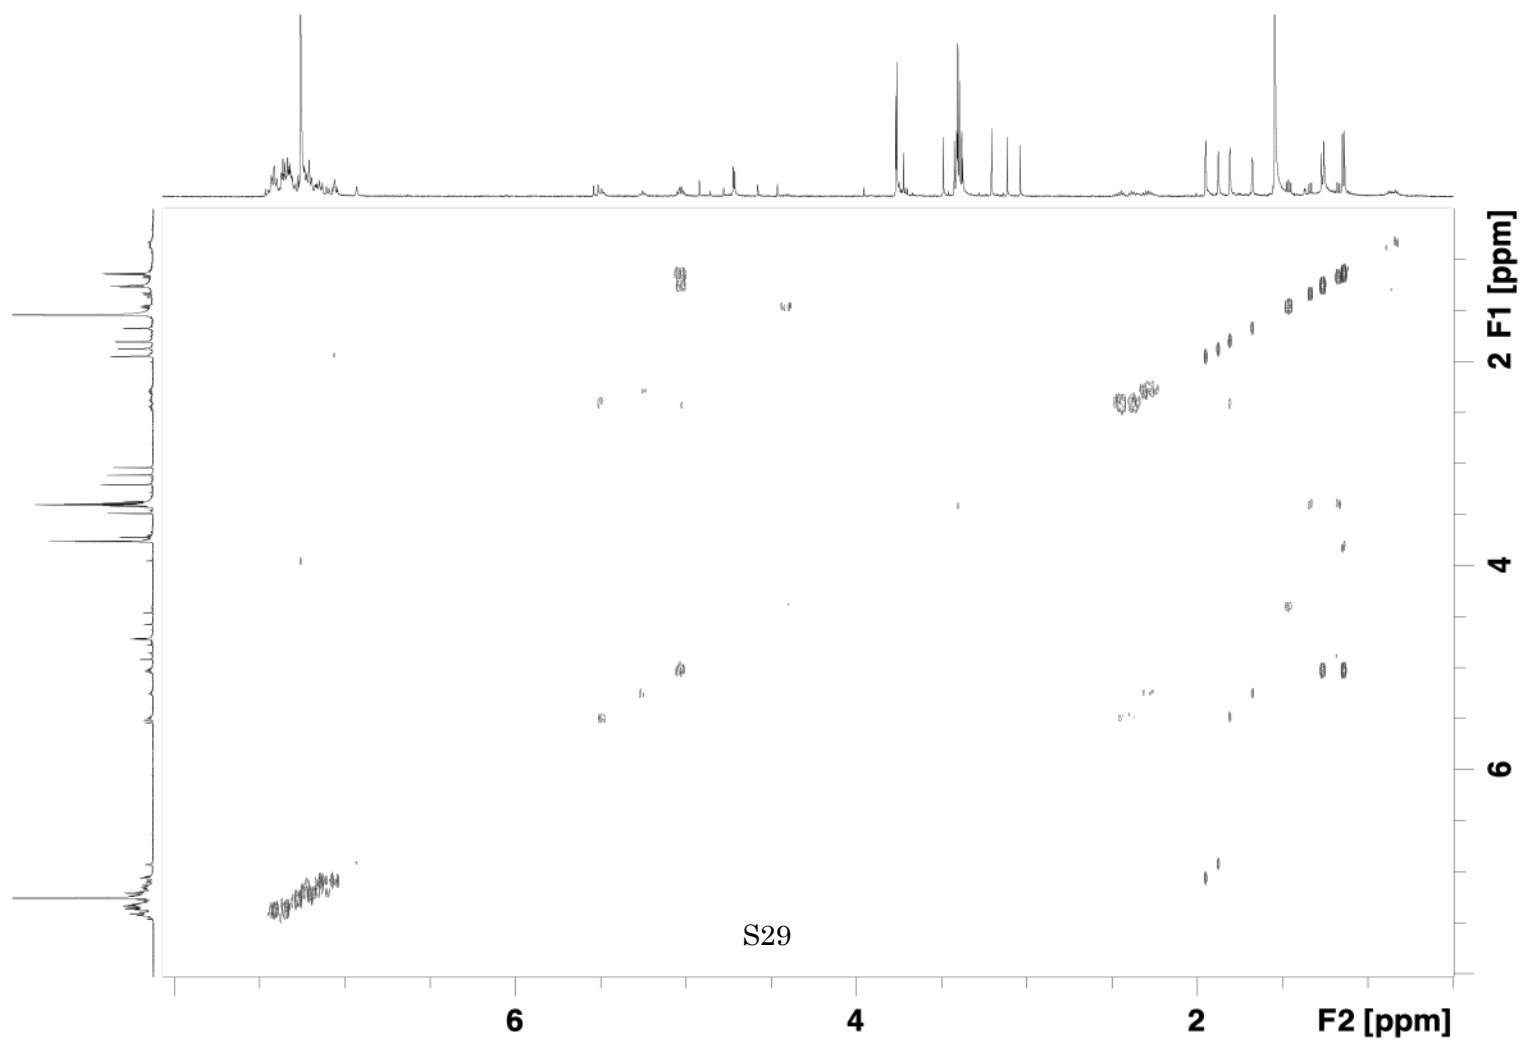

**Figure S26.**  $^1\text{H}$ - $^1\text{H}$  COSY spectrum of **4'b** (500 MHz,  $\text{CDCl}_3$ ).

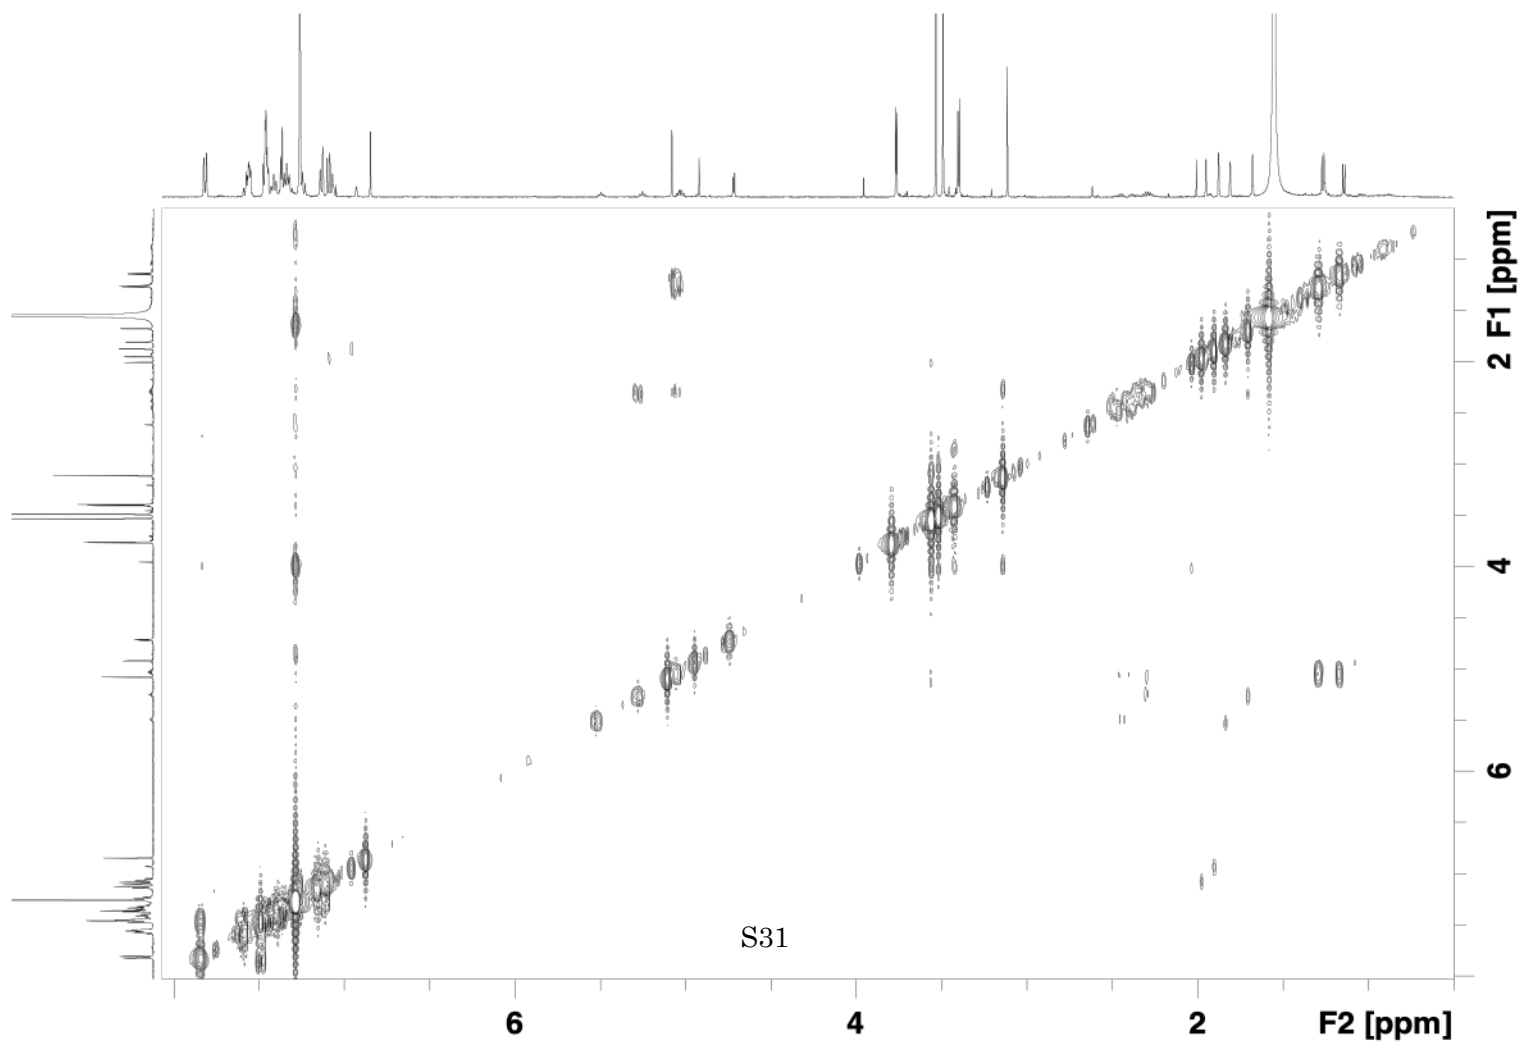

**Figure S27.**  $^1\text{H}$  NMR spectrum of compound **5** (500 MHz,  $\text{CDCl}_3$ ).

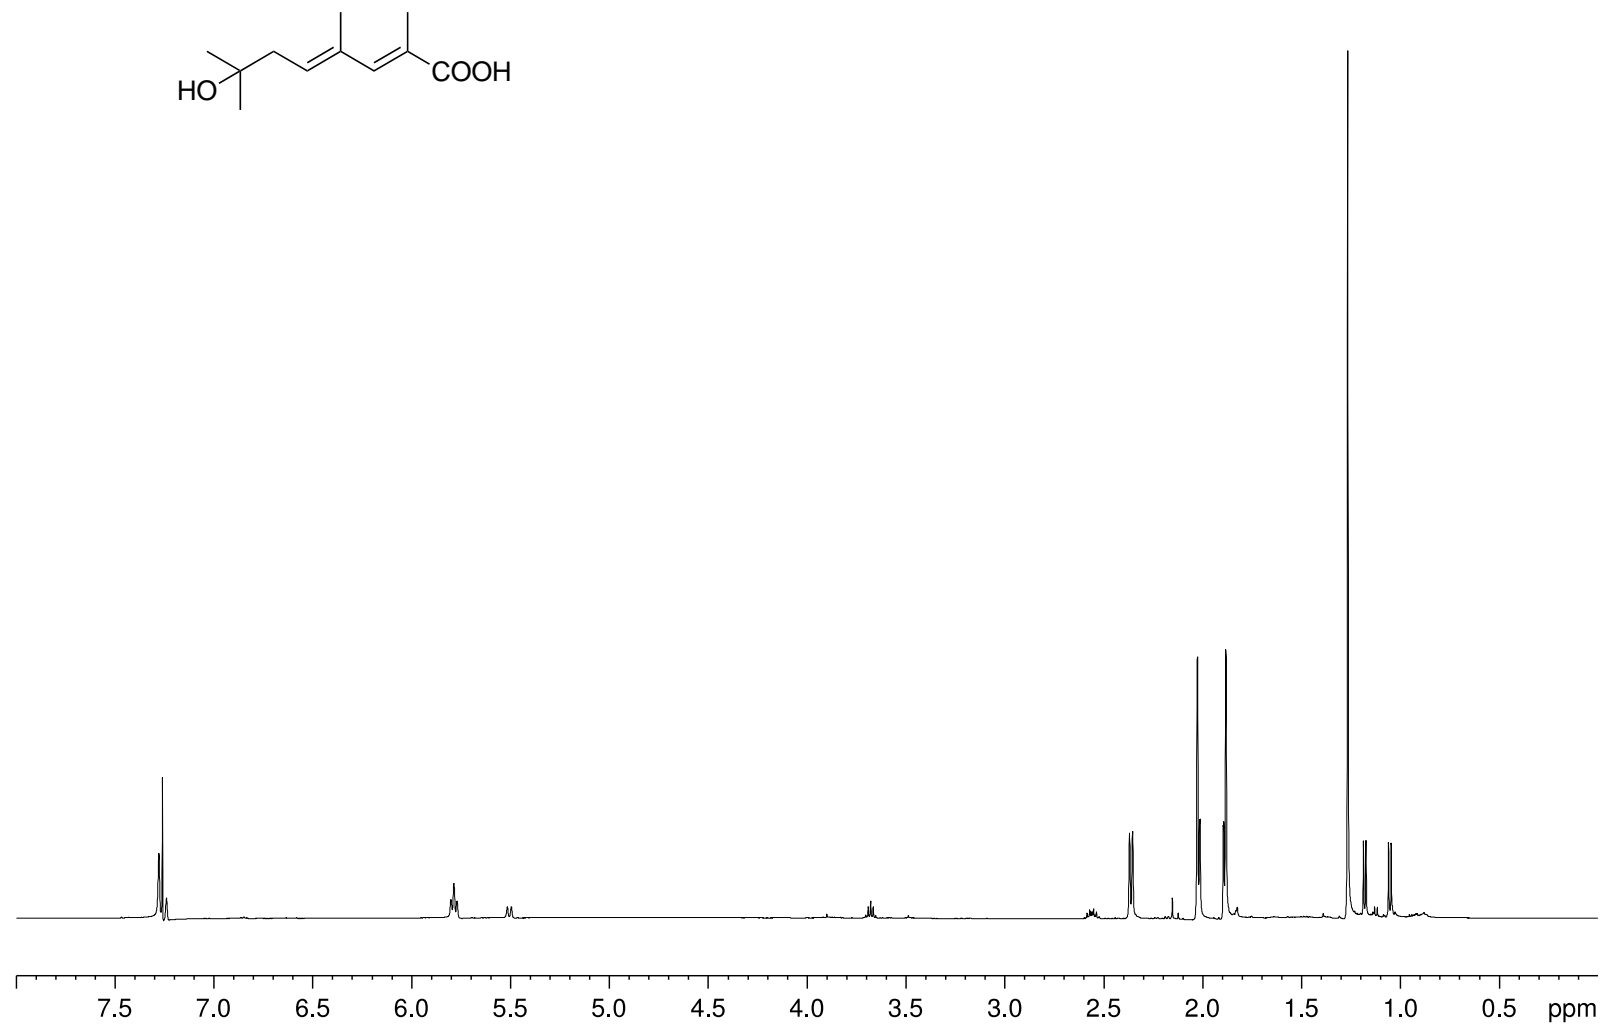



**Figure S28.**  $^{13}\text{C}$  NMR spectrum of **5** (125 MHz,  $\text{CDCl}_3$ ).

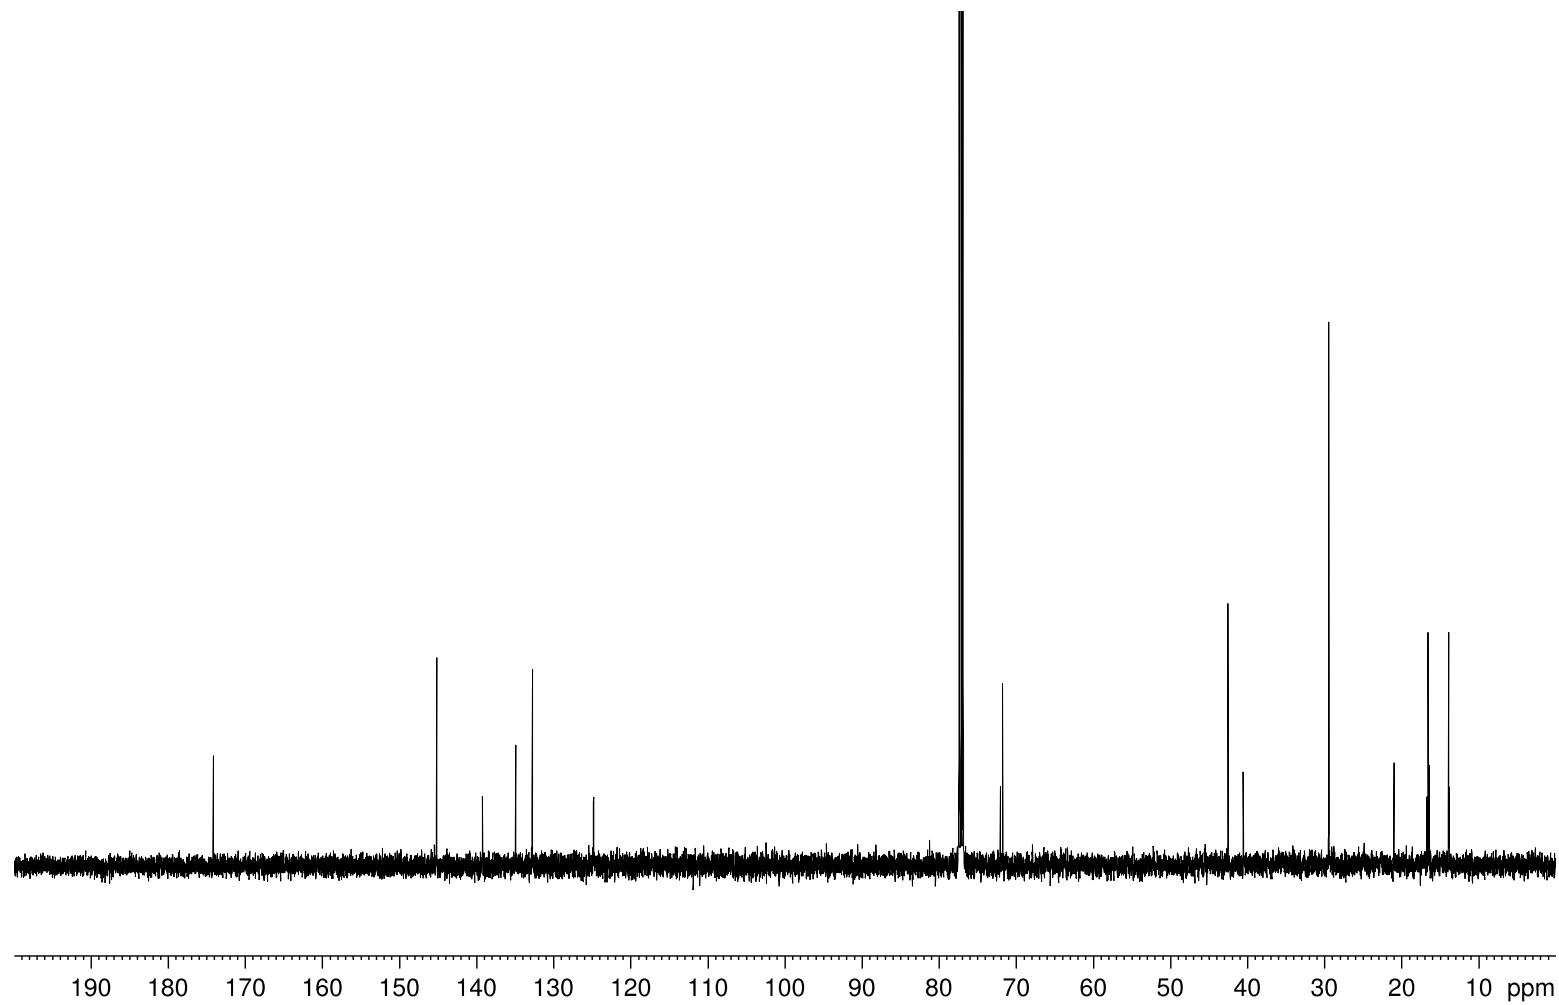

**Figure S29.**  $^1\text{H}$ - $^1\text{H}$  COSY spectrum of **5** (500 MHz,  $\text{CDCl}_3$ ).

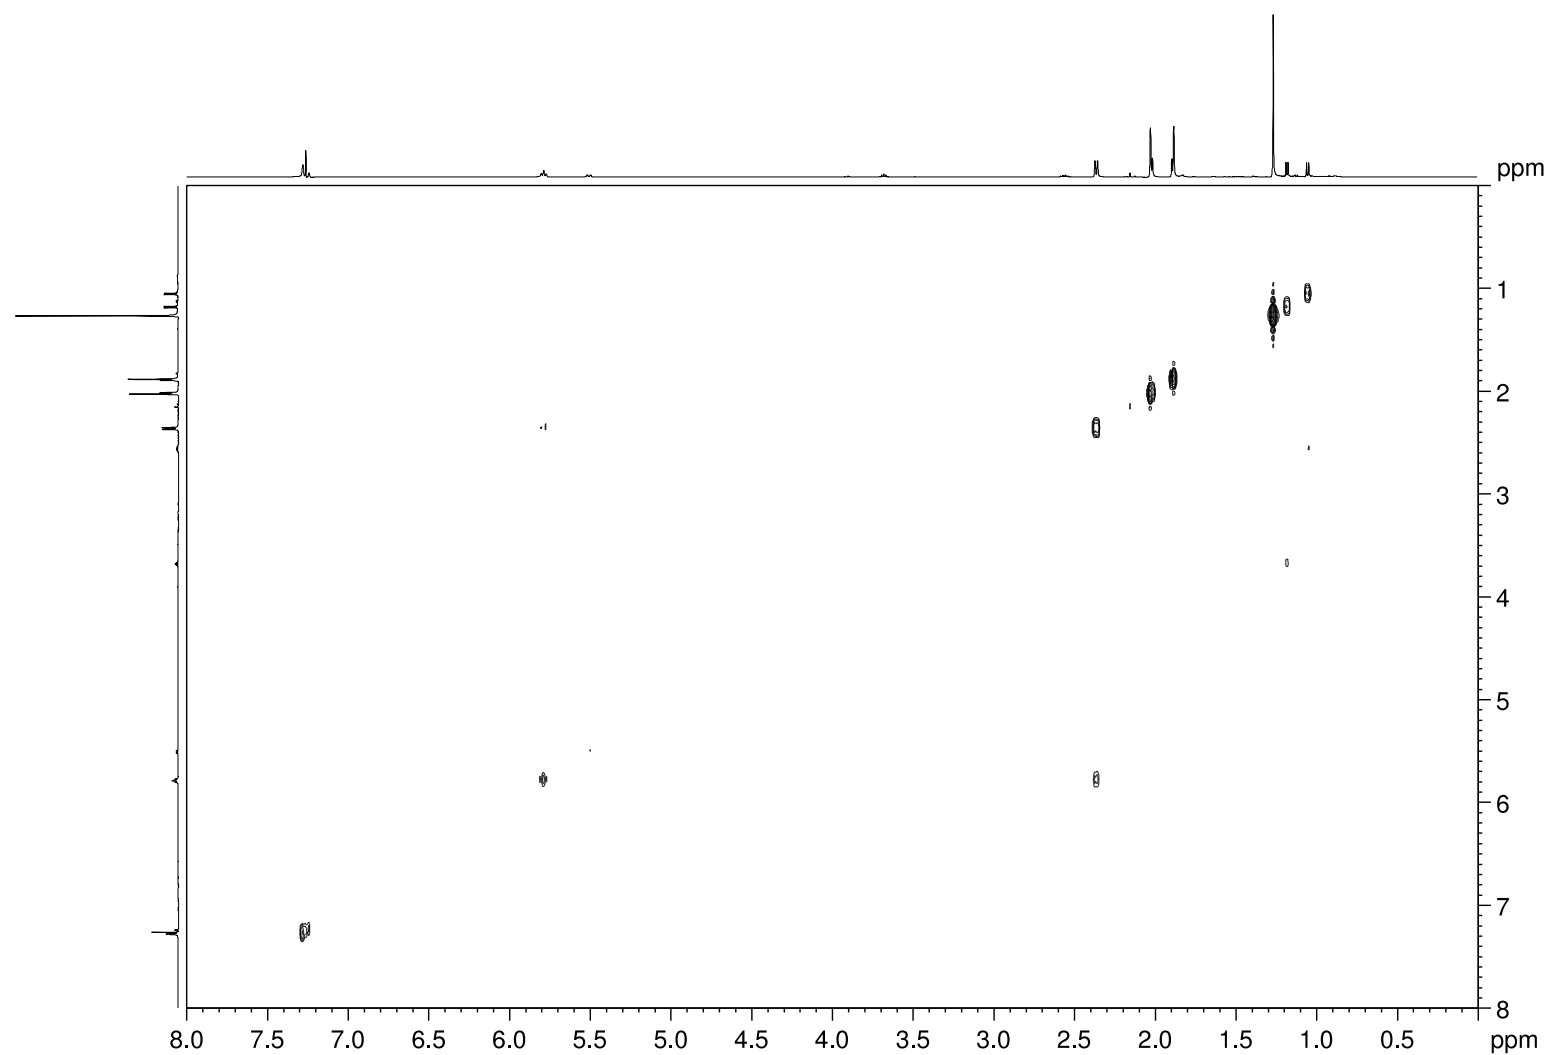

**Figure S30.** HSQC spectrum of **5** (500 MHz, CDCl<sub>3</sub>).

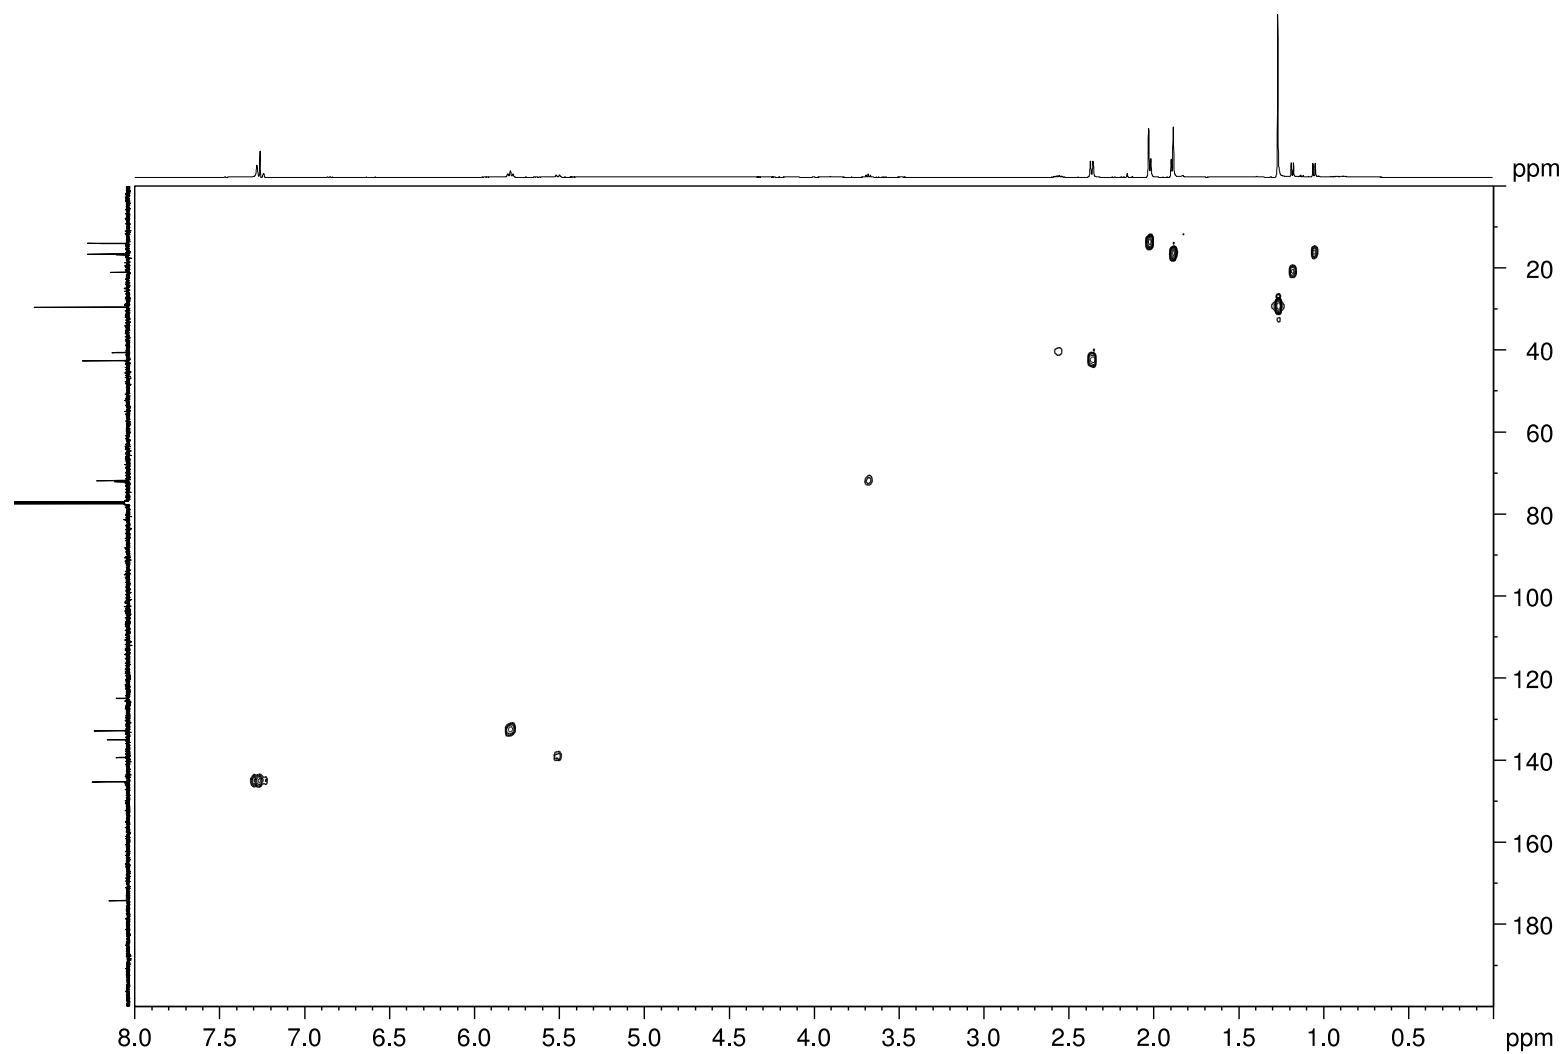

**Figure S31.** HMBC spectrum of **5** (500 MHz, CDCl<sub>3</sub>).

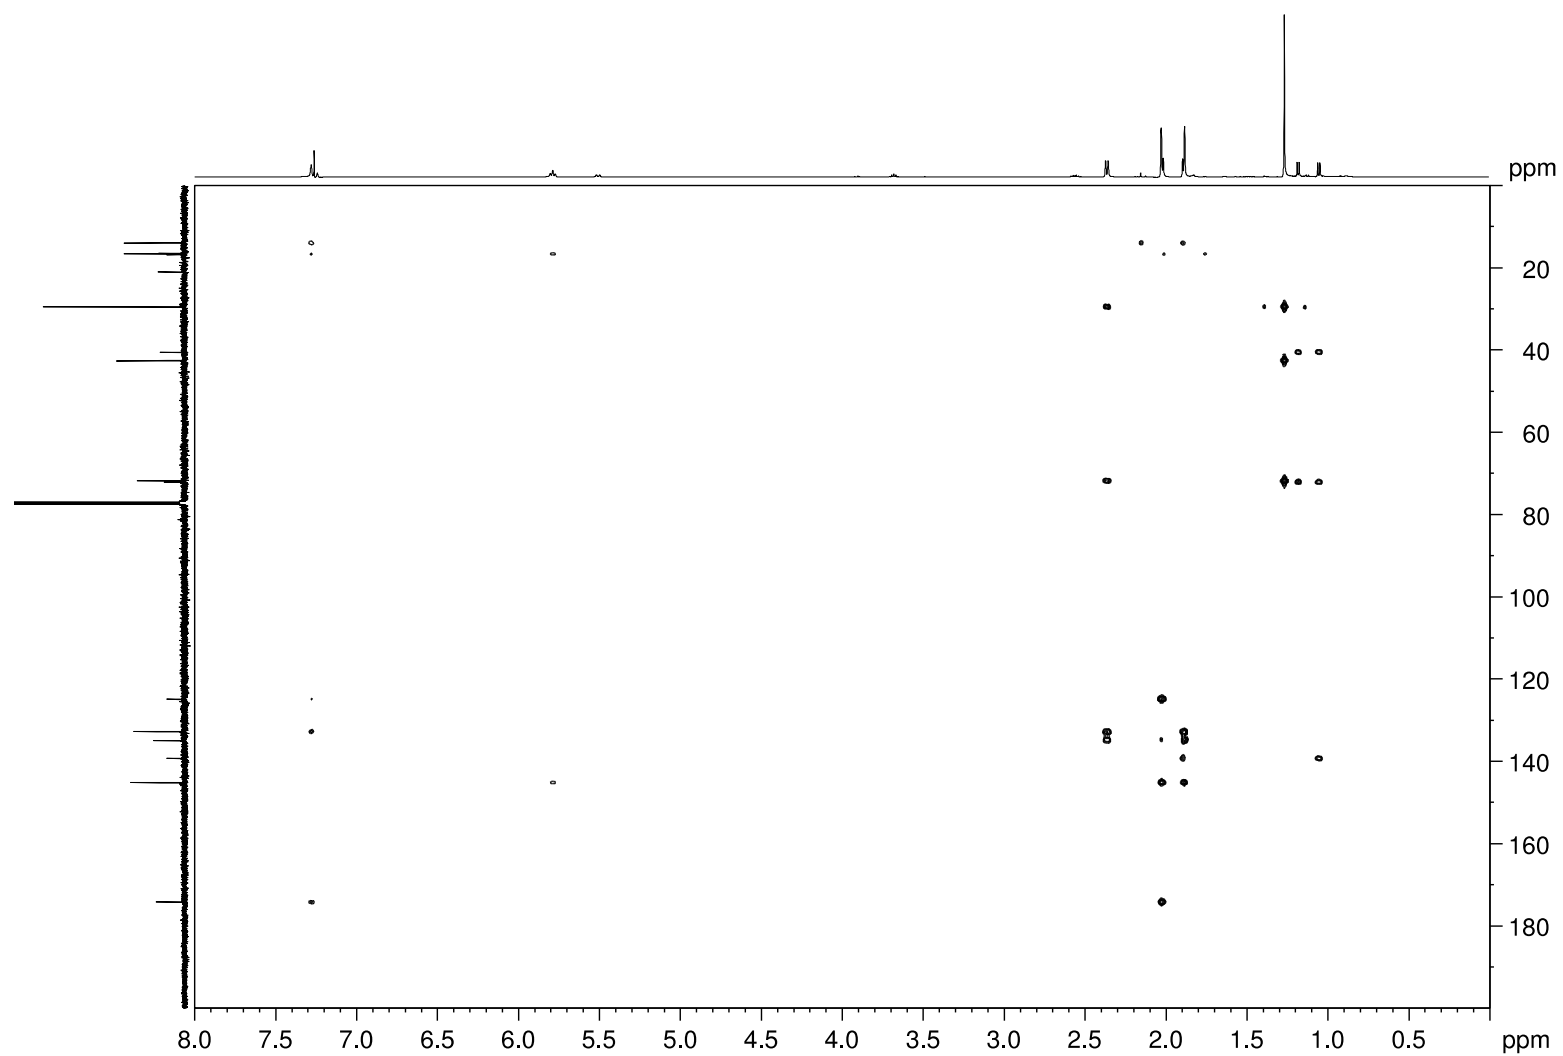

**Figure S32.** NOESY spectrum of **5** (500 MHz, CDCl<sub>3</sub>).

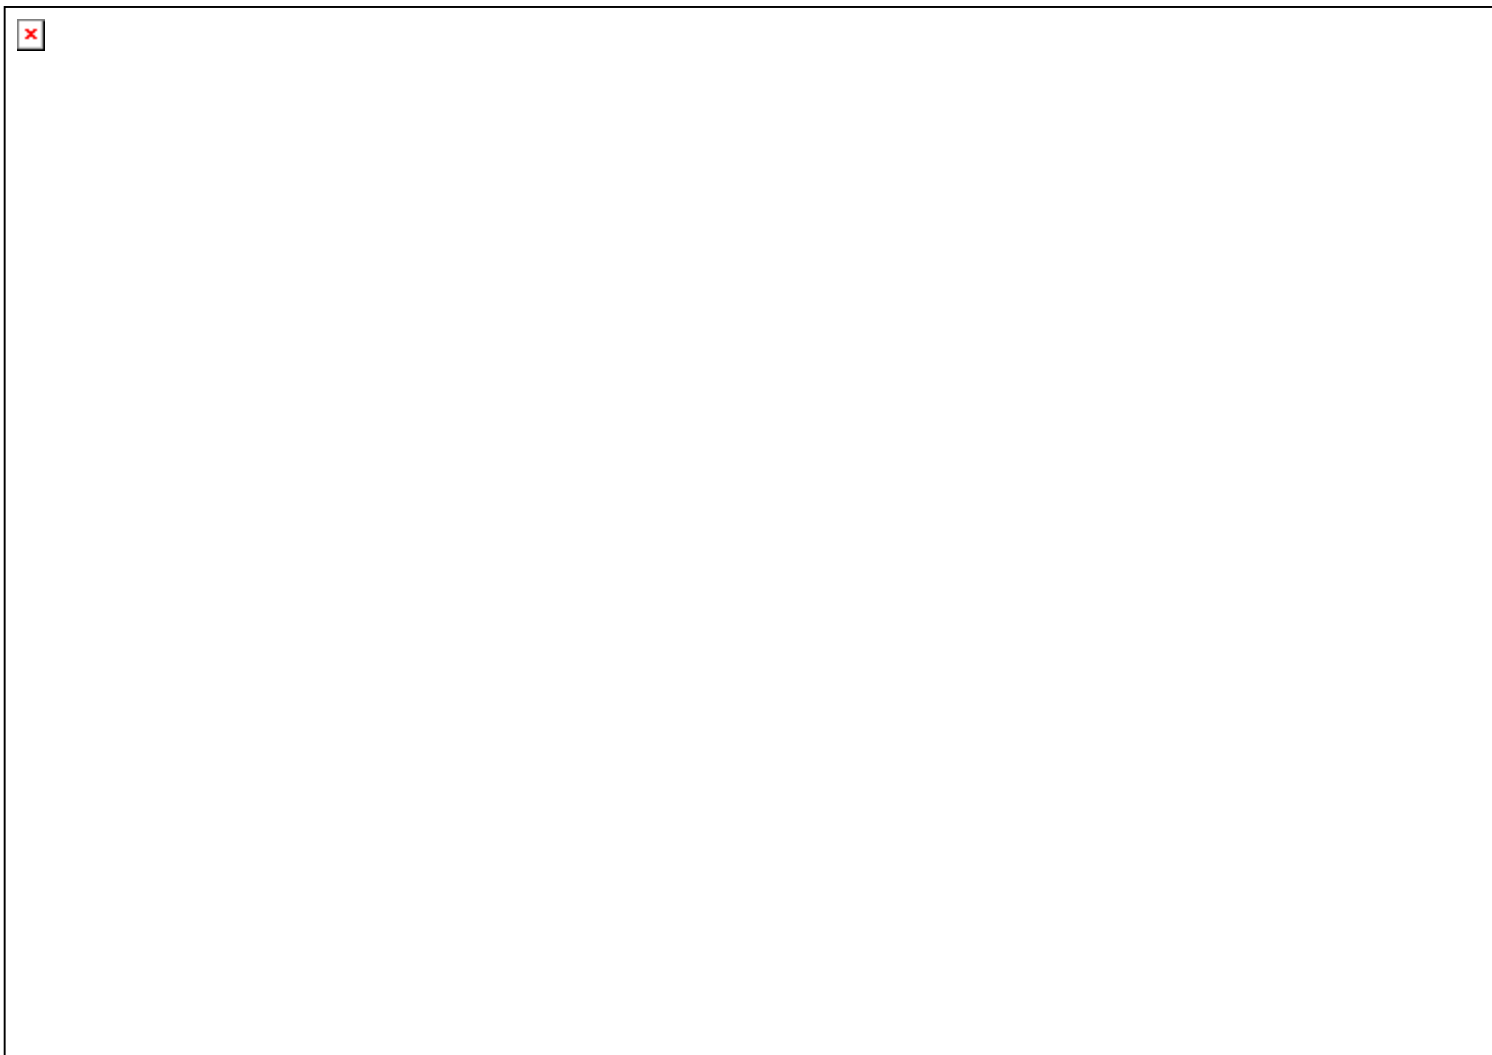

**Figure S33.**  $^1\text{H}$  NMR spectrum of compound **6** (500 MHz,  $\text{CDCl}_3$ ).

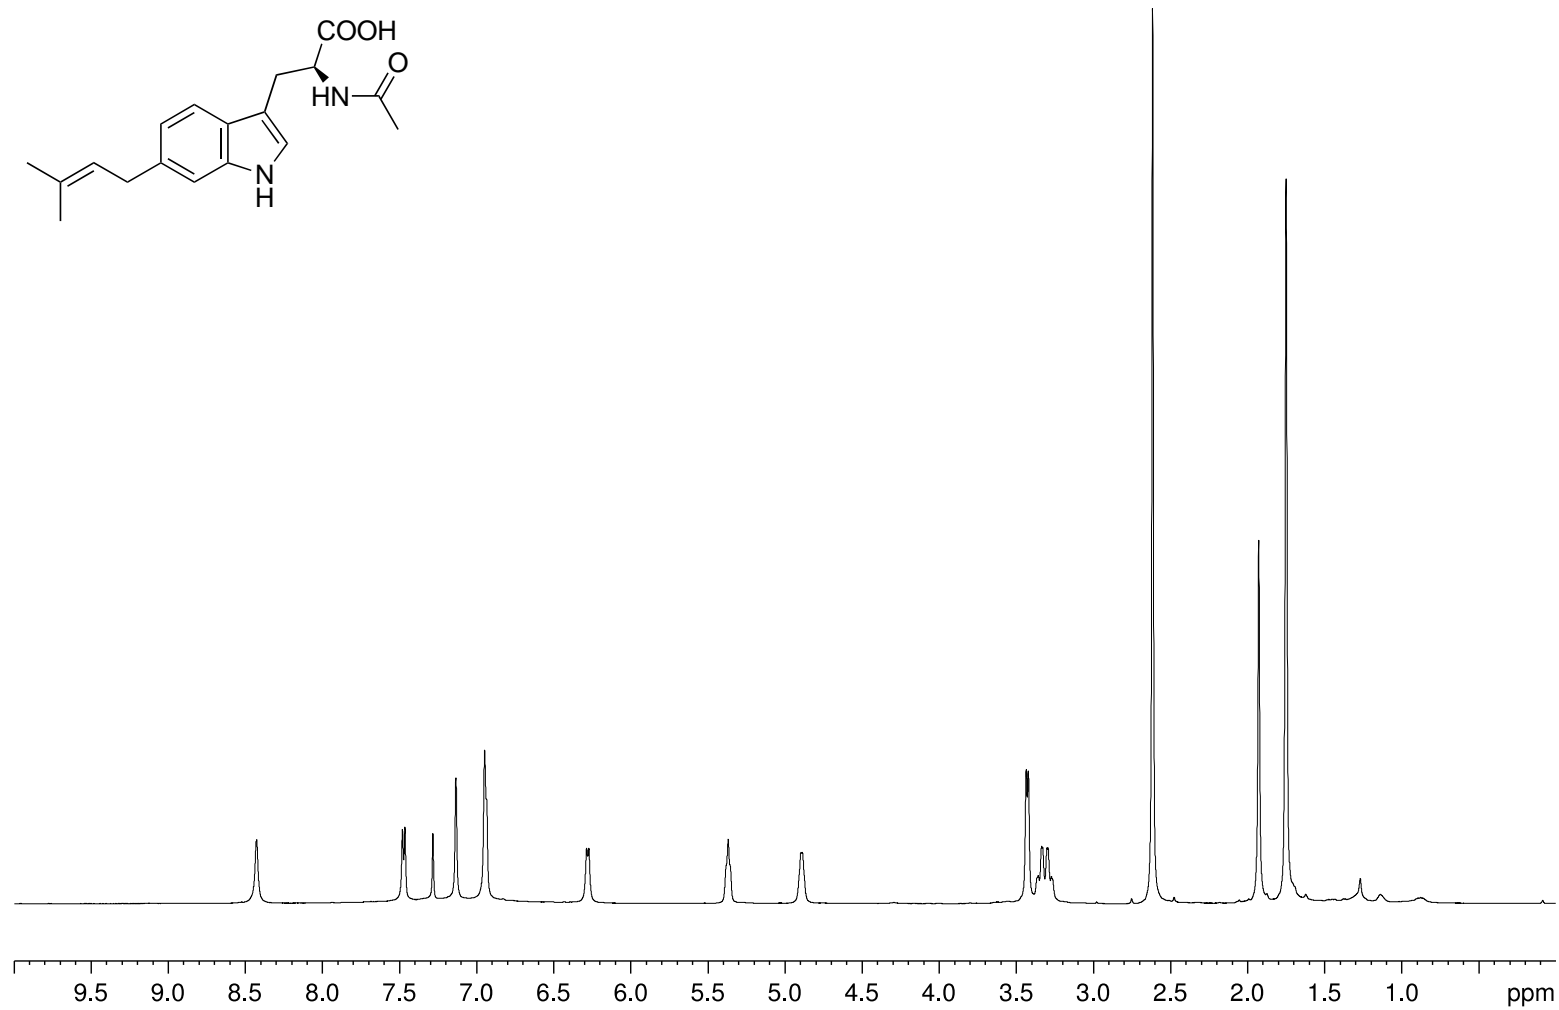

**Figure S34.**  $^{13}\text{C}$  NMR spectrum of **6** (125 MHz,  $\text{CDCl}_3$ ).

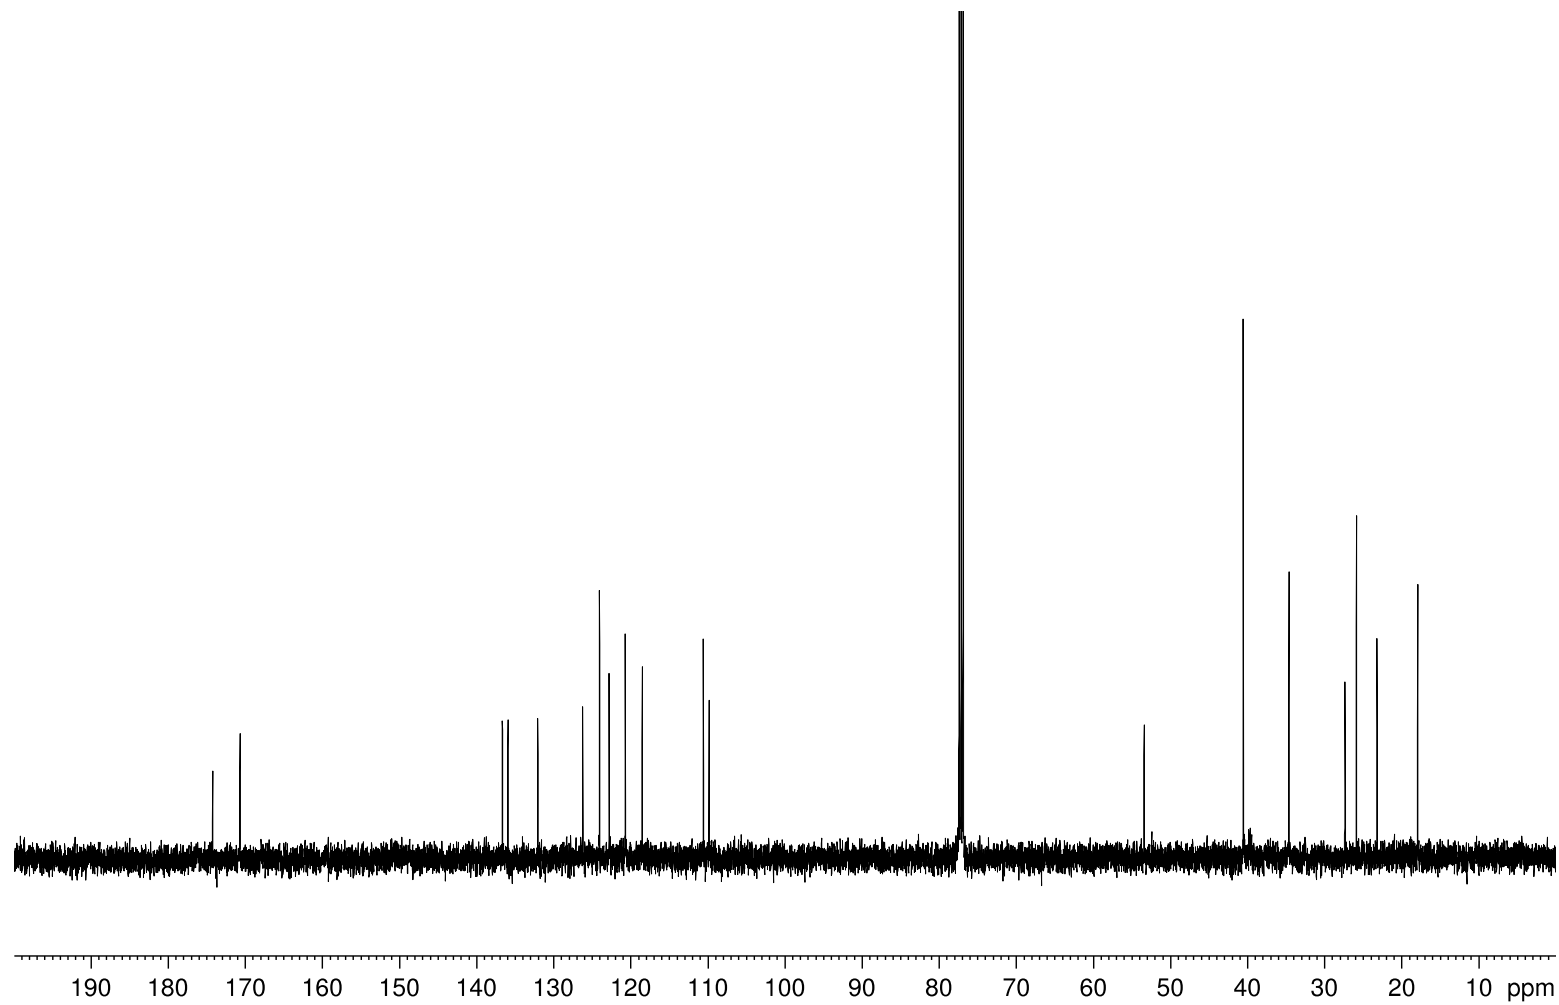

**Figure S35.**  $^1\text{H}$ - $^1\text{H}$  COSY spectrum of **6** (500 MHz,  $\text{CDCl}_3$ ).

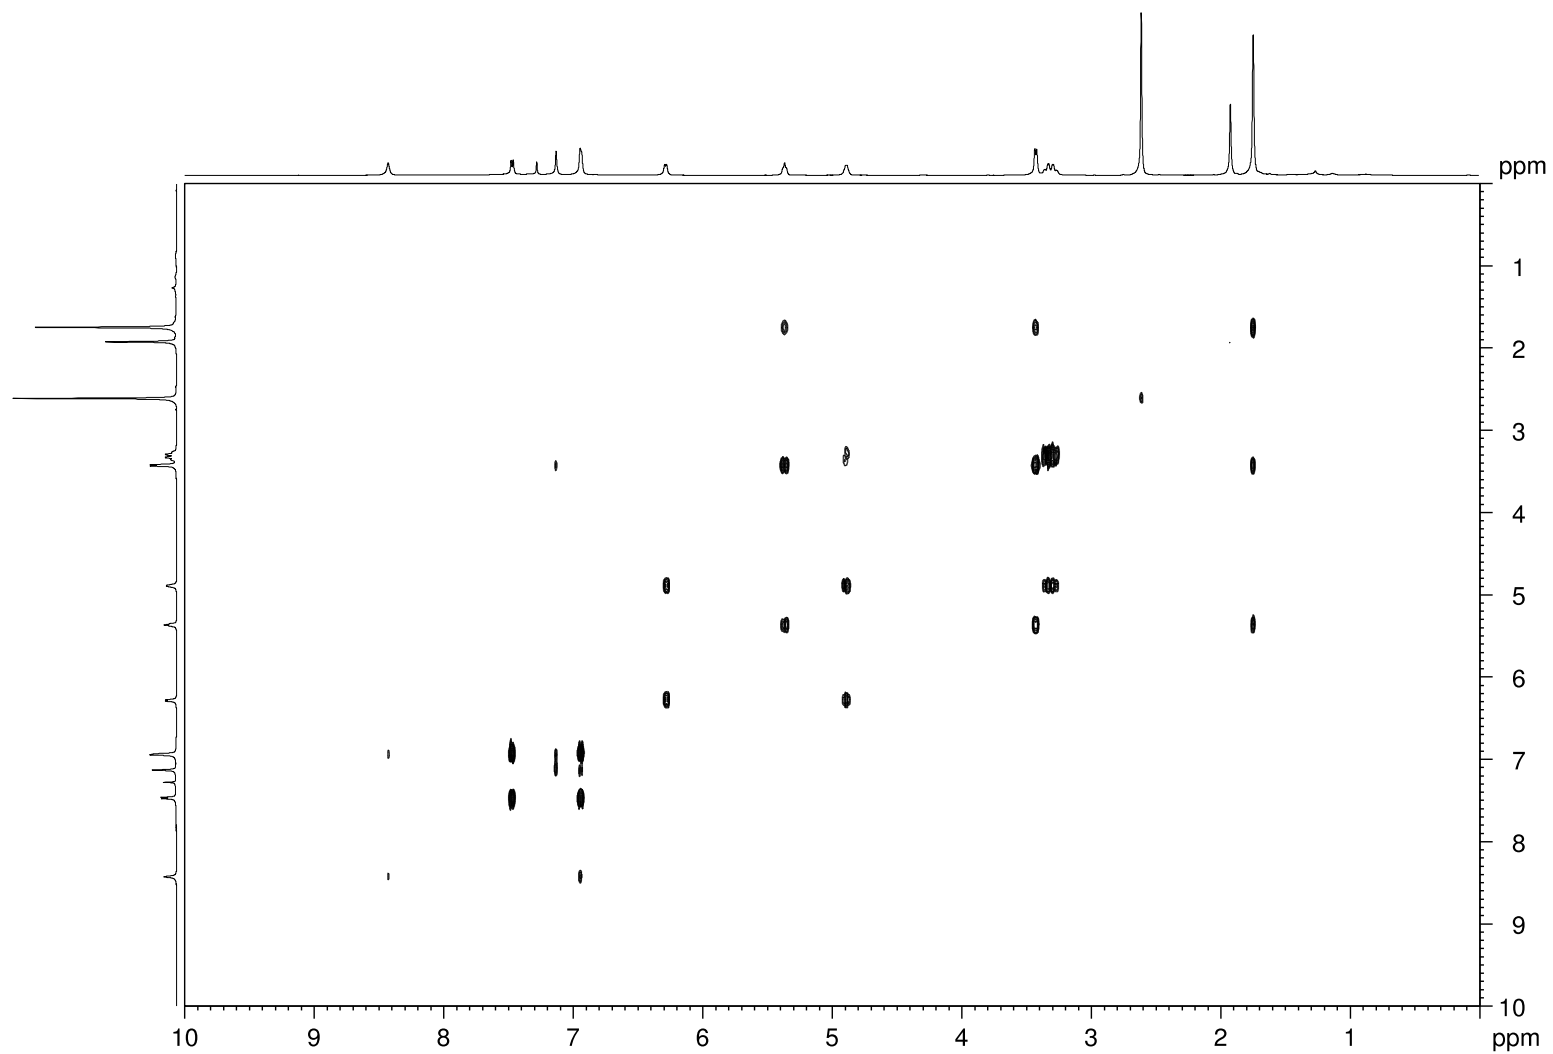



**Figure S36.** HSQC spectrum of **6** (500 MHz, CDCl<sub>3</sub>).

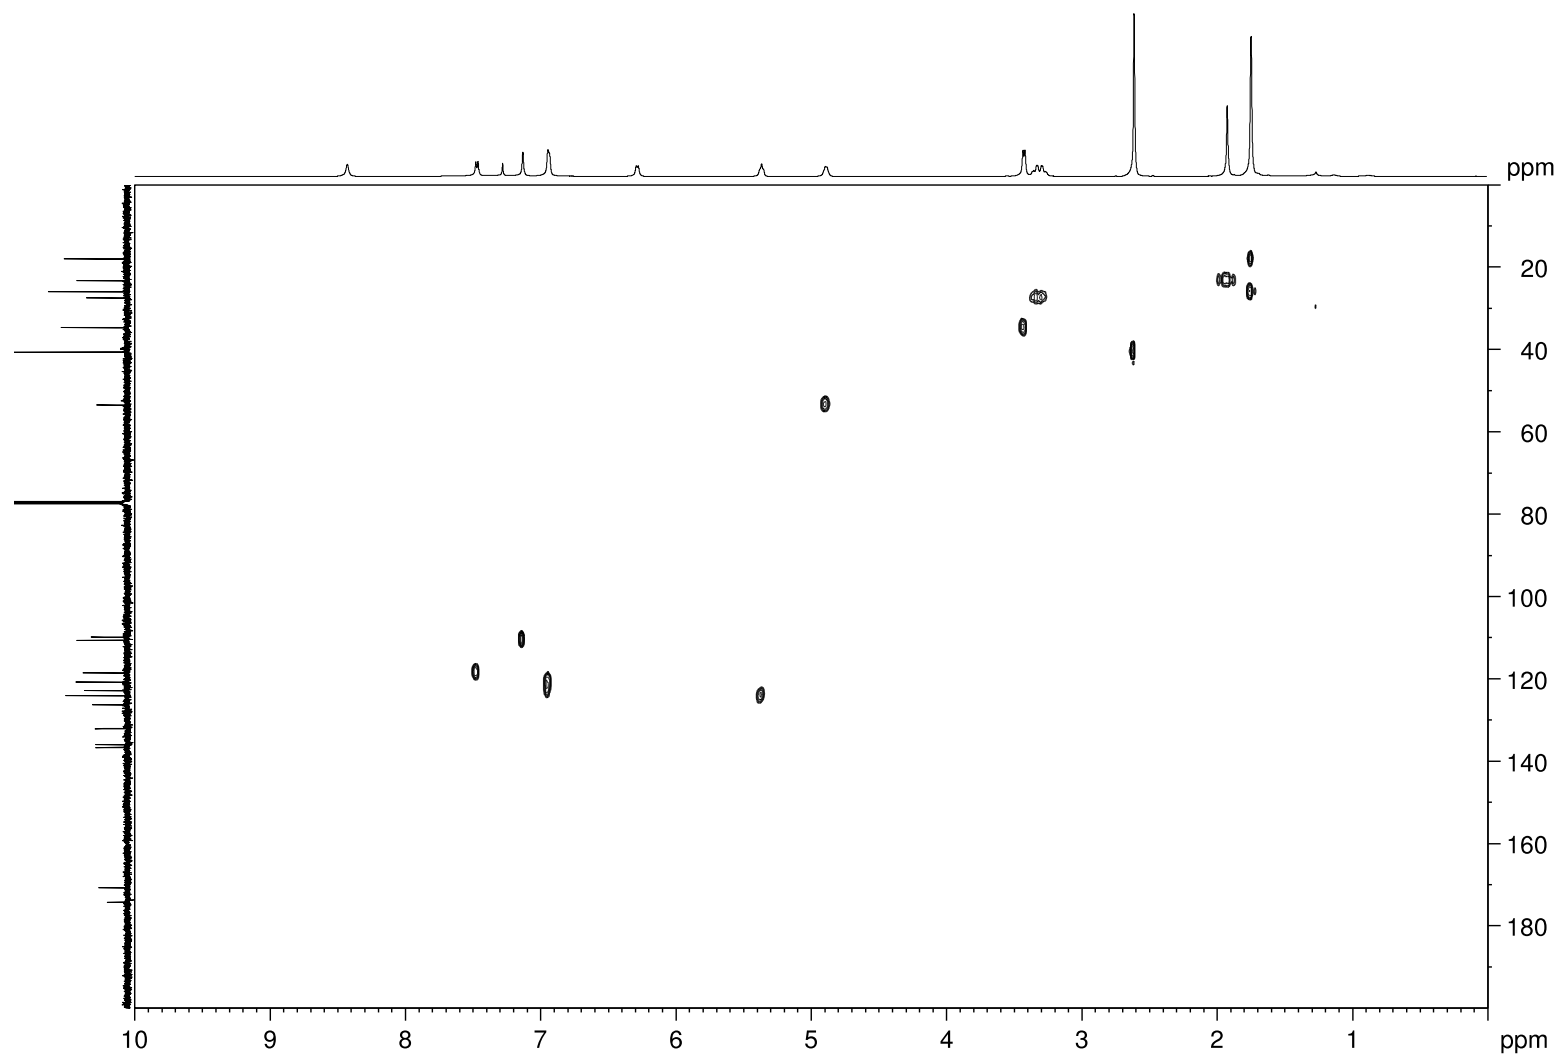

**Figure S37.** HMBC spectrum of **6** (500 MHz, CDCl<sub>3</sub>).

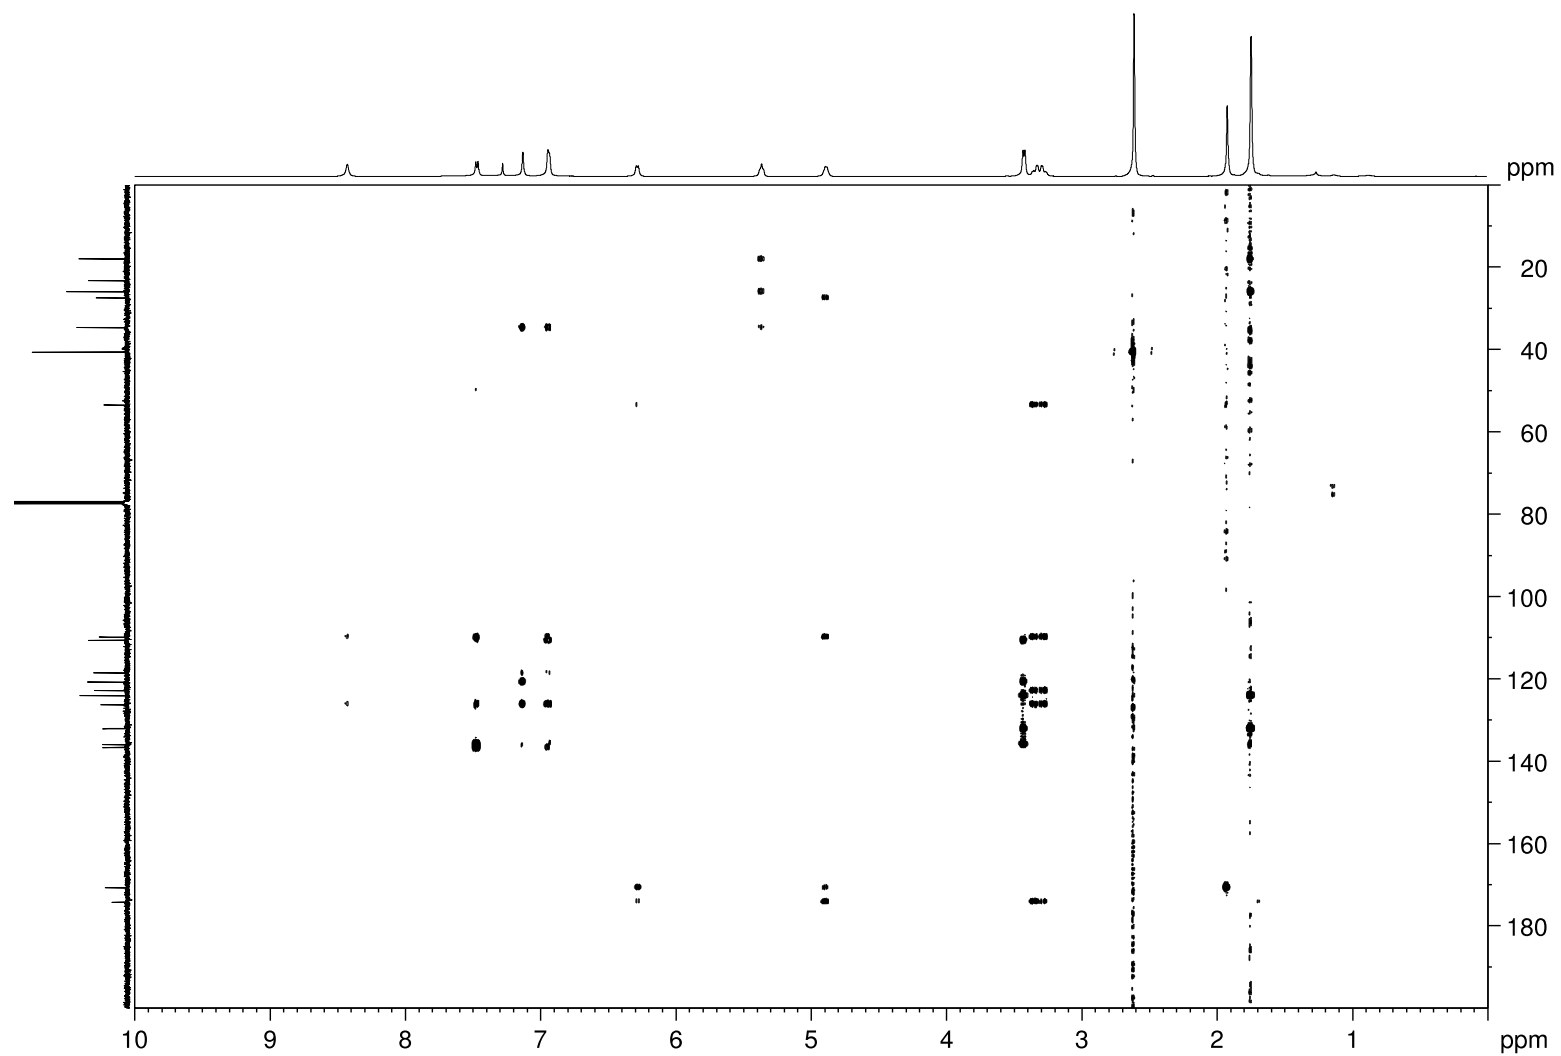

**Figure S38.**  $^1\text{H}$  NMR spectrum of **6a** (500 MHz,  $\text{DMSO-}d_6$ ).

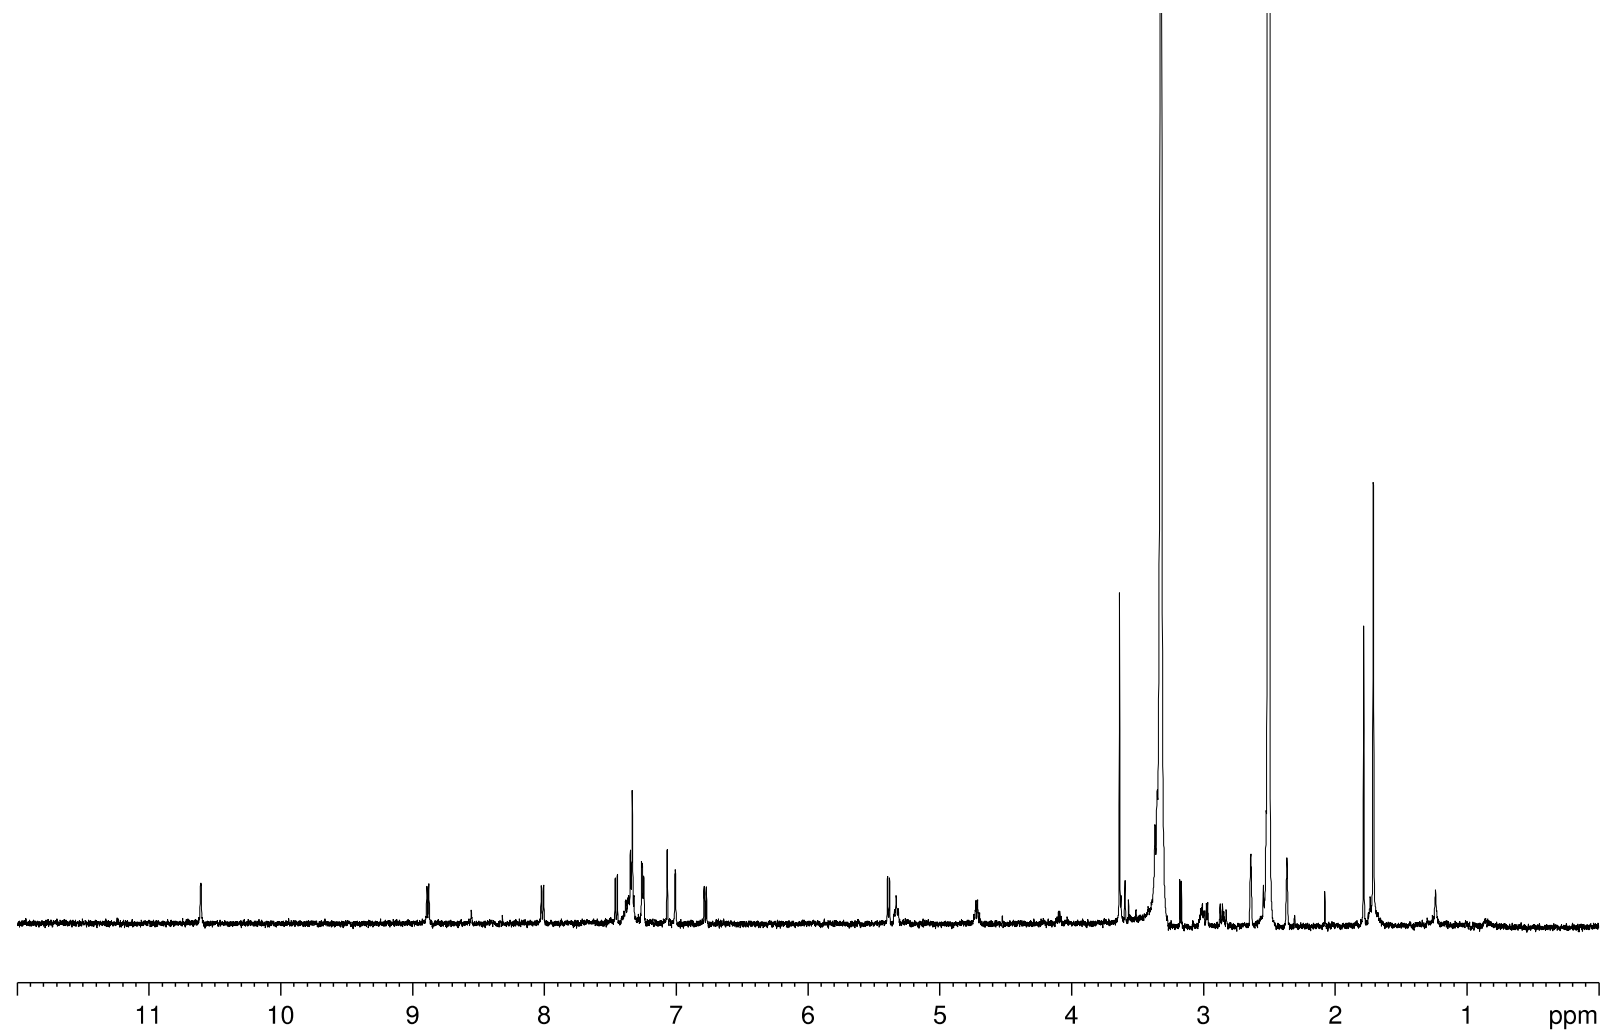

**Figure S39.**  $^1\text{H}$ - $^1\text{H}$  COSY spectrum of **6a** (500 MHz,  $\text{DMSO-}d_6$ ).

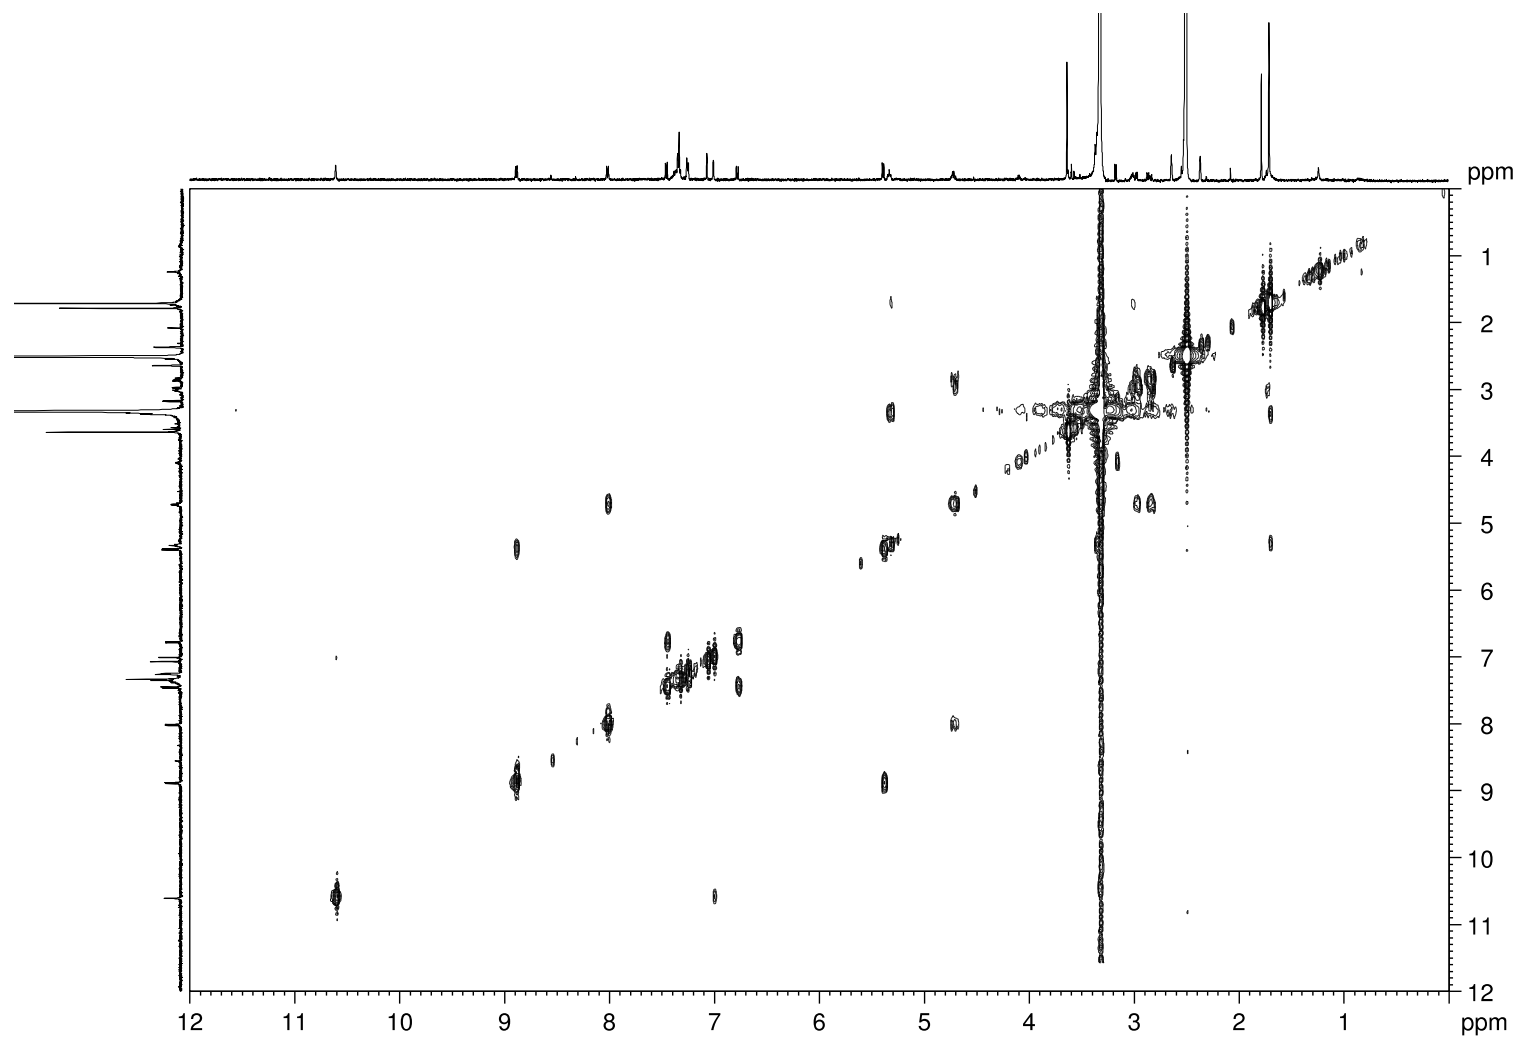

**Figure S40.** HSQC spectrum of **6a** (500 MHz, DMSO- $d_6$ ).

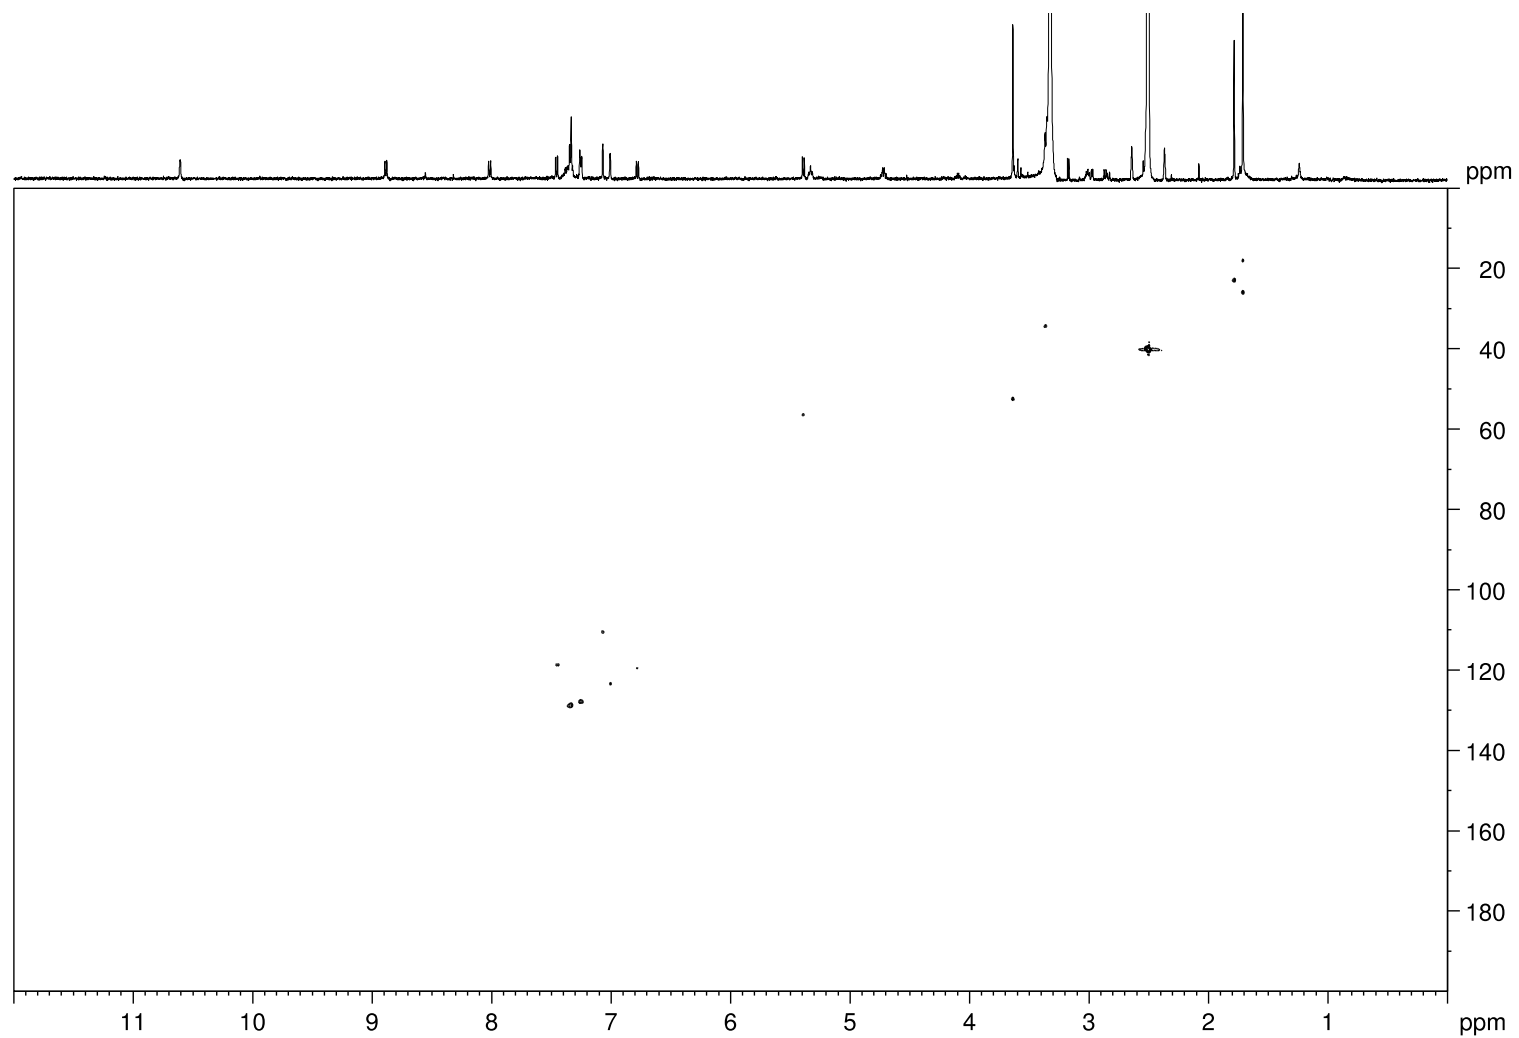

**Figure S41.** HMBC spectrum of **6a** (500 MHz, DMSO- $d_6$ ).

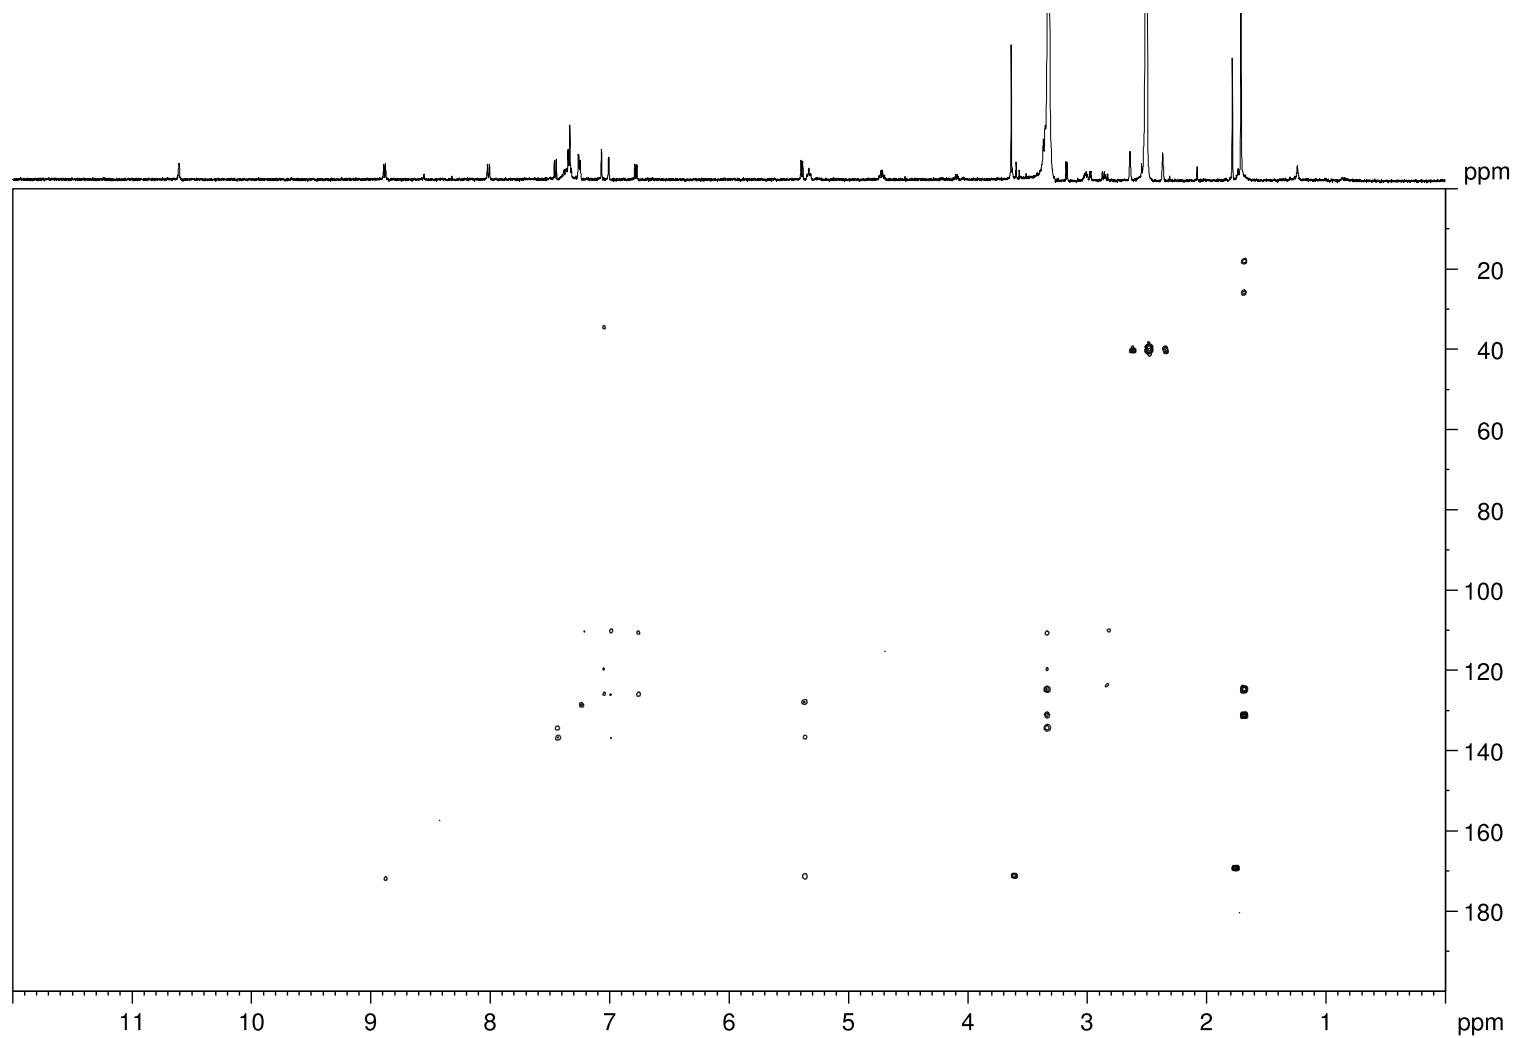

**Figure S42.**  $^1\text{H}$  NMR spectrum of **6b** (500 MHz,  $\text{DMSO}-d_6$ ).

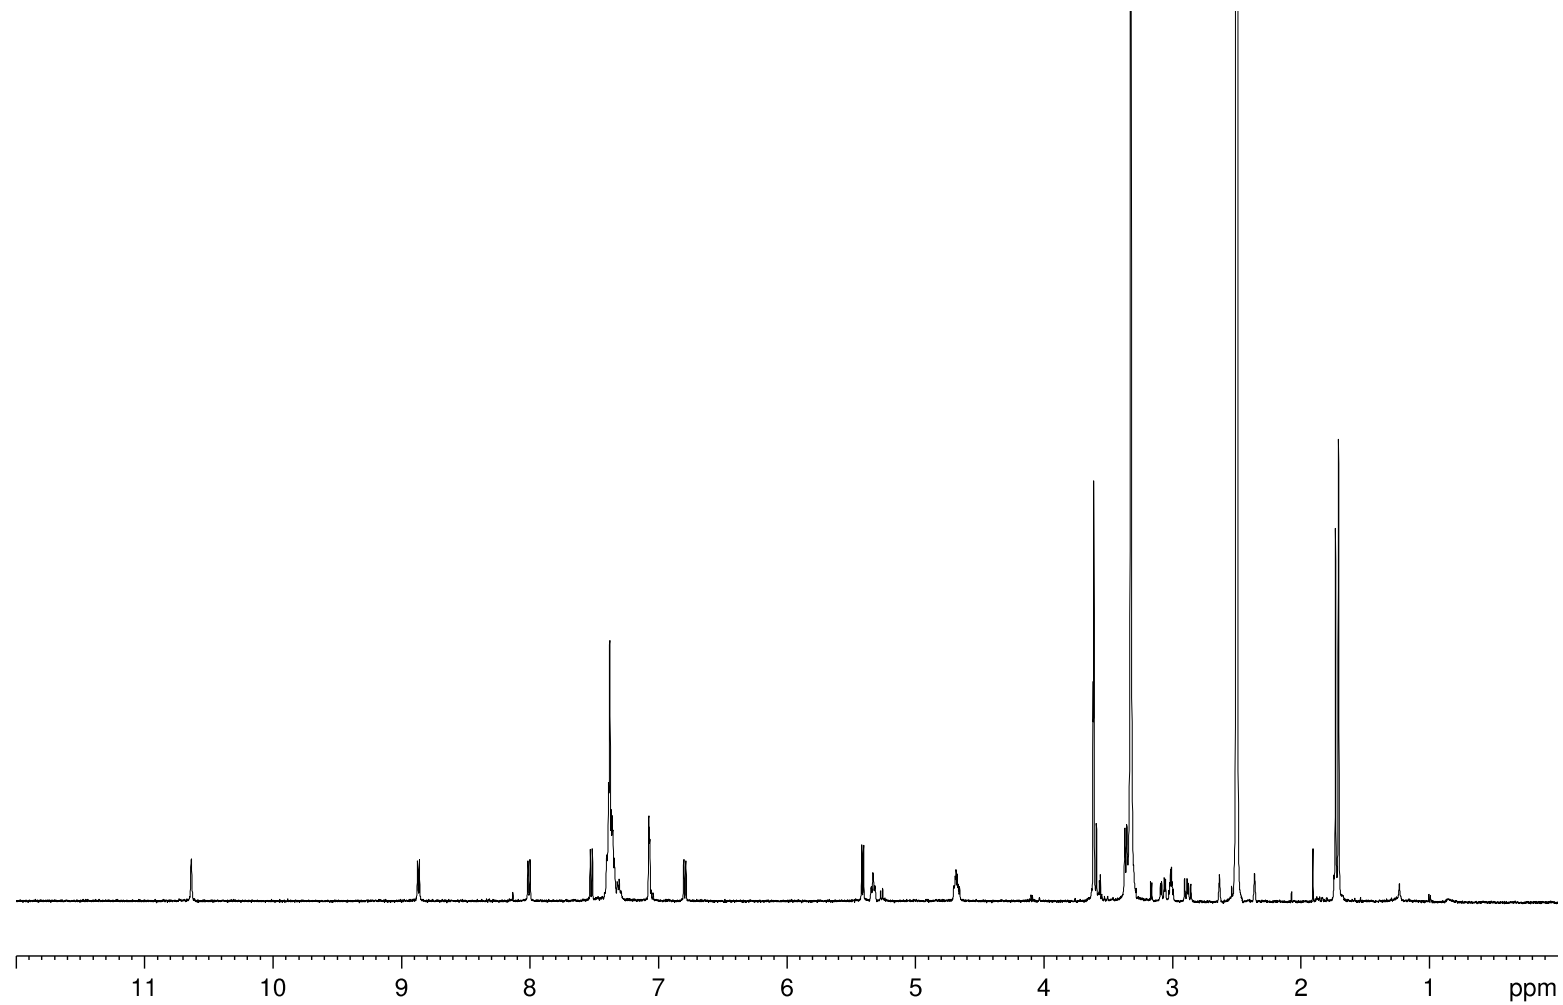

**Figure S43.**  $^1\text{H}$ - $^1\text{H}$  COSY spectrum of **6b** (500 MHz,  $\text{DMSO-}d_6$ ).

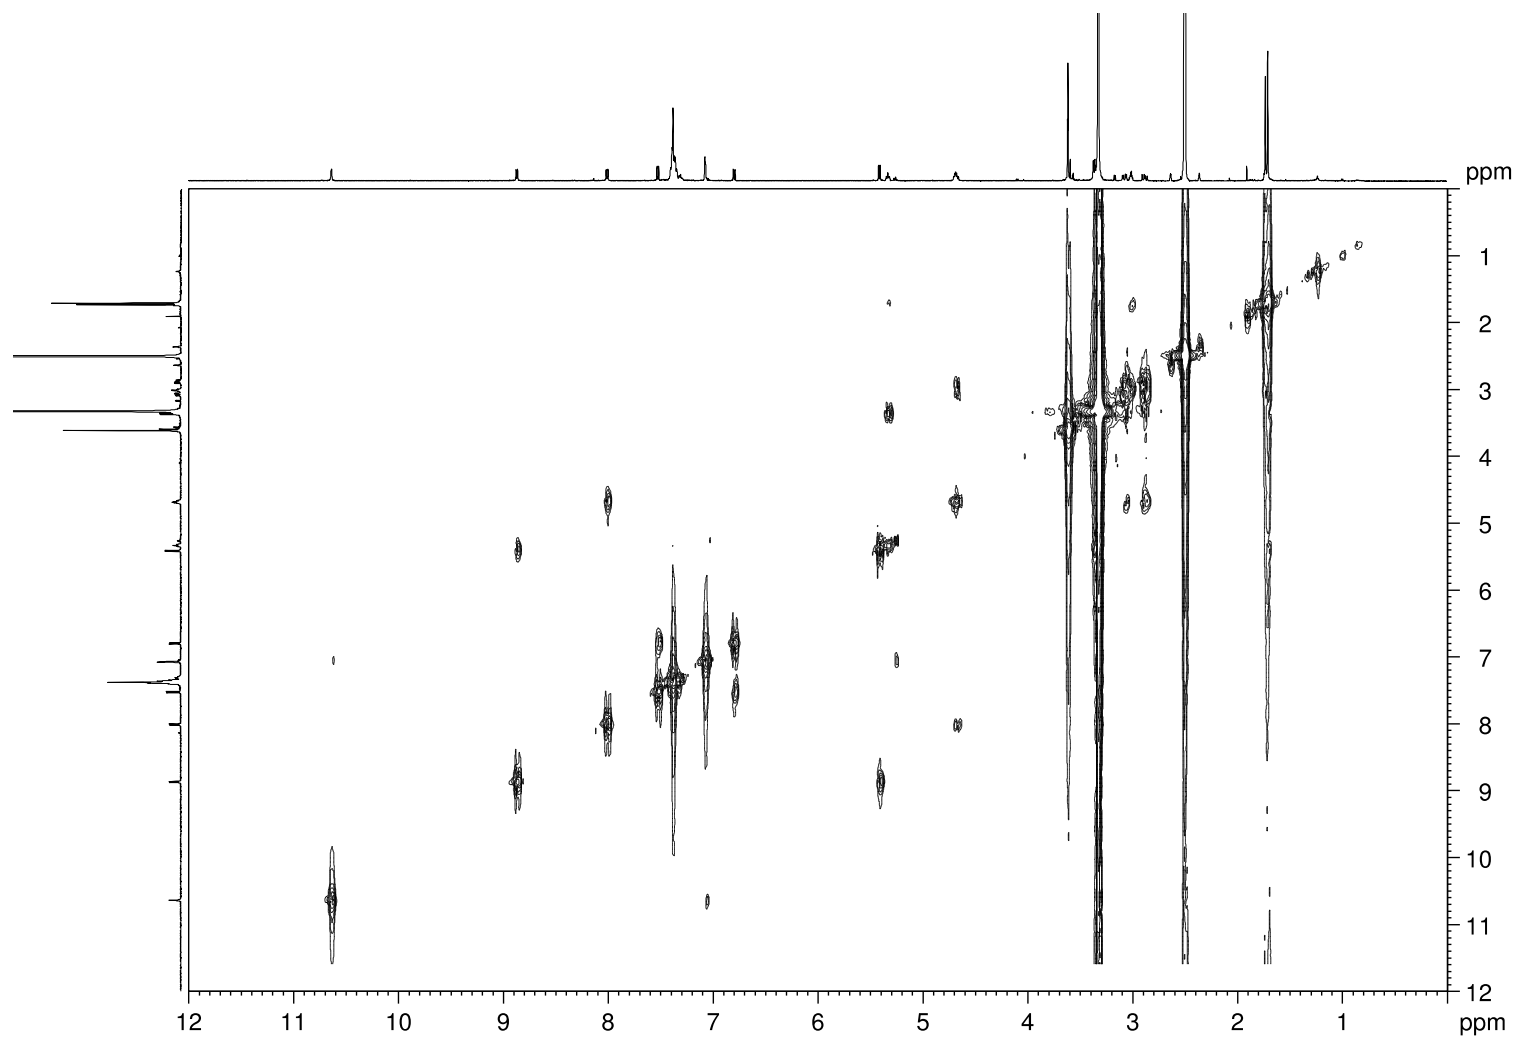



**Figure S44.** HSQC spectrum of **6b** (500 MHz, DMSO- $d_6$ ).

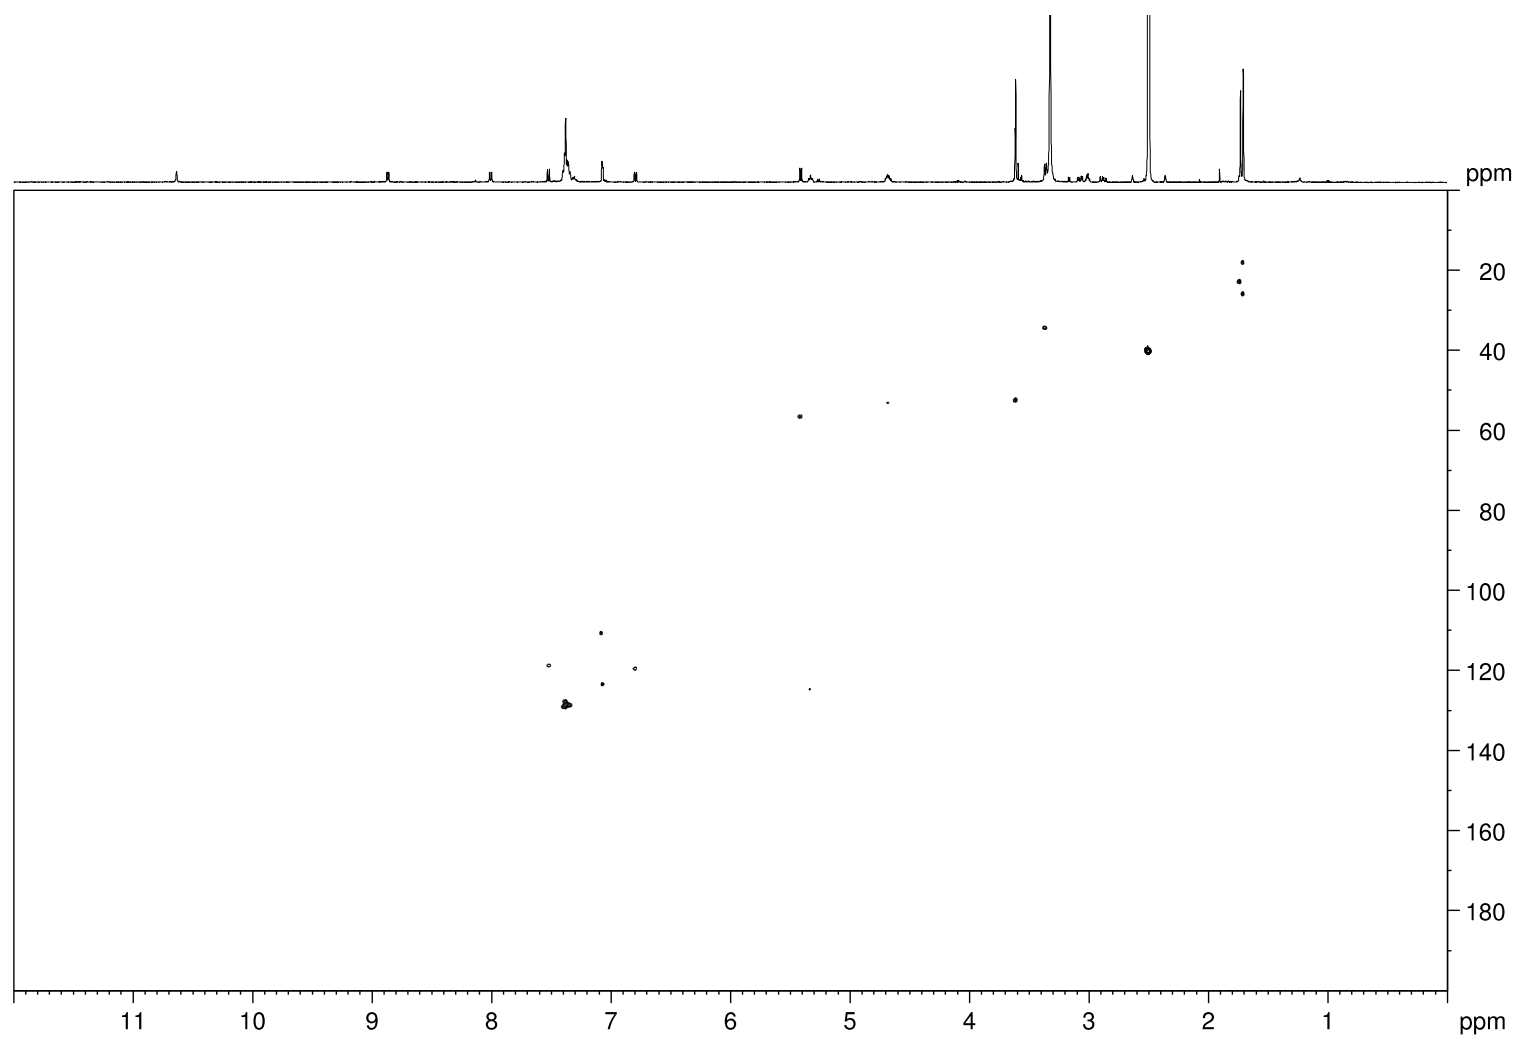

**Figure S45.** HMBC spectrum of **6b** (500 MHz, DMSO-*d*<sub>6</sub>).

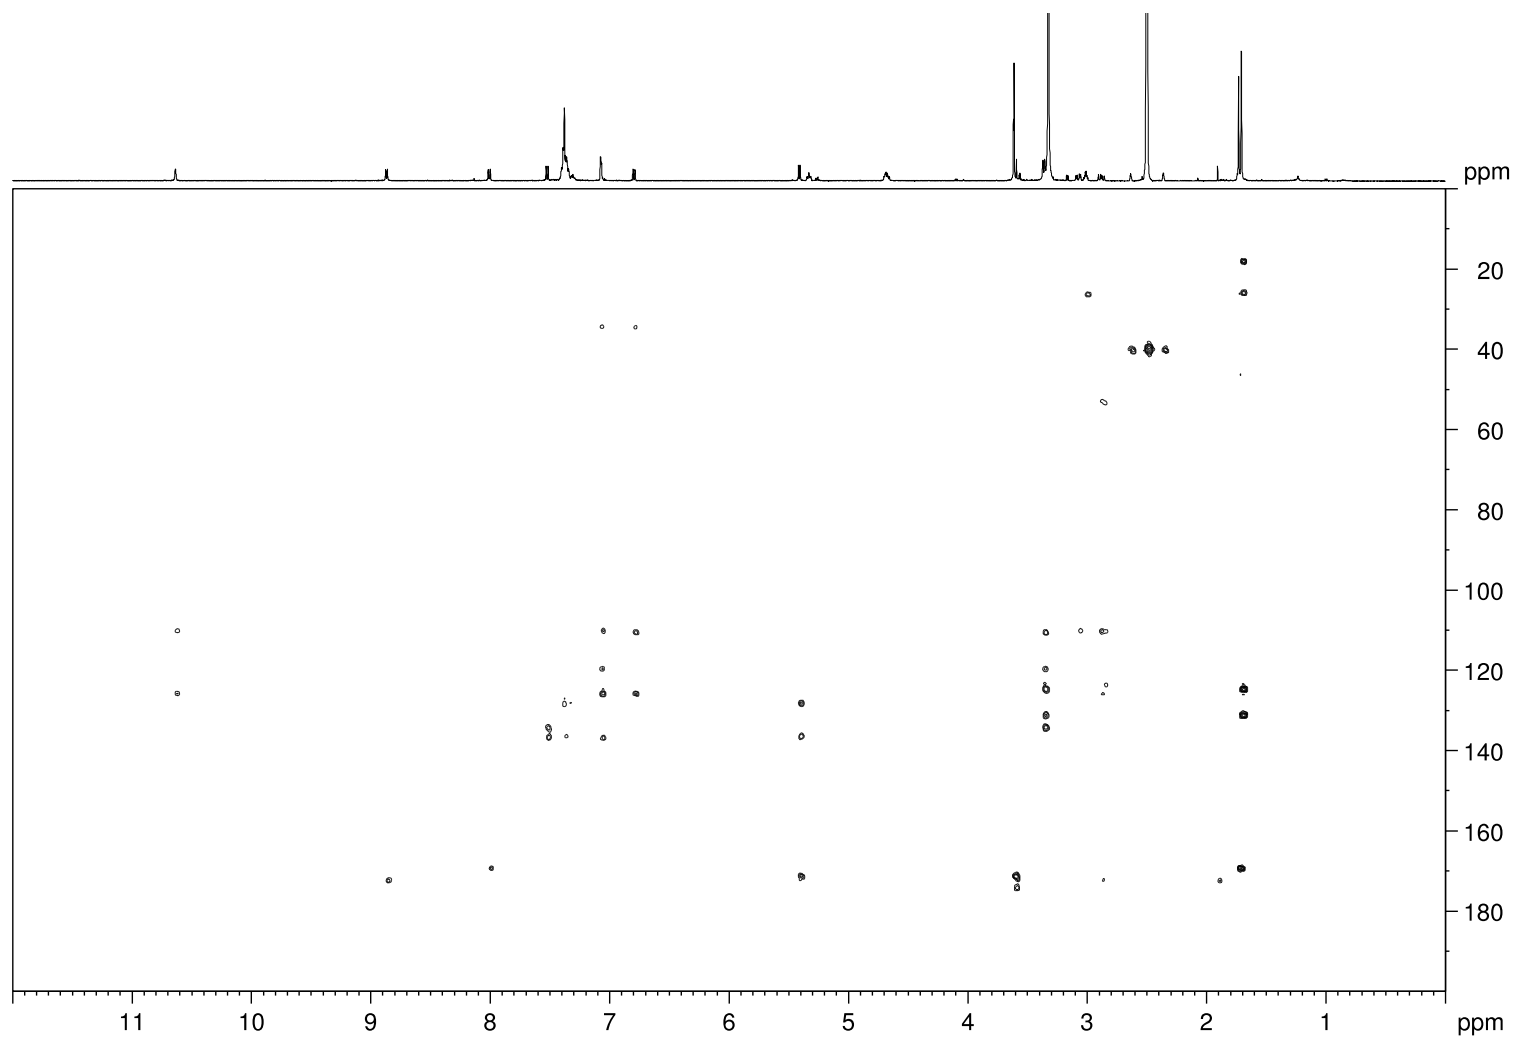

Supplement: Additional file 1 [file 1860-5397-17-203-S1.pdf]
